# Supplementary material for: The chromatin environment shapes DNA replication origin organization and defines origin classes
Source: HighWire-hosted journal article supplement (doi:10.1101/gr.192799.115), 2015-11-11
Supplement: Table_S1.xlsx [file Table_S1.xlsx]

## Sheet: Heatmap
position Heatmap	marks/factors	marks/factors with IS	IS with marks/factors	IS.Sn	IS.PPV	marks/factors with Random IS	Random IS with marks/factors	rand.Sn	rand.PPV	p.value	p.value.log	marks/factors with IZ	IZ with marks/factors	IZ.Sn	IZ.PPV	marks/factors with Random IZ	Random IZ with marks/factors	rand.Sn	rand.PPV	p.value	p.value.log	class1 with marks/factors	class1.pval	class2 with marks/factors	class2.pval	class3a with marks/factors	class3a.pval	class3b with marks/factors	class3b.pval	Authors	year	PMID	GEO_GSE
0	Number of Sites	/	65019	/	/	/	65019X1000	/	/	/	/	/	35512	/	/	/	35512X1000	/	/	/		28443	/	14873	/	10547	/	11156	/
1	H3K56ac	0.105524	0.169274	0.169274	0.105524	0.00837273	0.0117812	0.0117812	0.0083727	0	-19096.6	0.371537	0.37393	0.37393	0.371537	0.0521186	0.0703987	0.0703987	0.0521186	0	-11401	0.0935555	/	0.18268	/	0.29032	/	0.230011	/	Yuliang Tan	2013	23798425	GSE47387_GSM1148636
2	H3K27ac	0.244238	0.242683	0.242683	0.244238	0.0427908	0.0225319	0.0225319	0.0427908	0	-23195.6	0.332172	0.255745	0.255745	0.332172	0.0704842	0.0551081	0.0551081	0.0704842	0	-6820.03	0.147136	/	0.243797	/	0.416991	/	0.320007	/	Pengfei Yu	2013	23033340	GSE38596_GSM881349
3	p300	0.227177	0.179563	0.179563	0.227177	0.0261194	0.0129962	0.0129962	0.0261194	0	-19832.5	0.34857	0.251267	0.251267	0.34857	0.0607276	0.0474206	0.0474206	0.0607276	0	-7645.01	0.116303	/	0.147247	/	0.309187	/	0.261384	/	Keith E Szulwach	2013	23602153	GSE41545_GSM1019072
4	TBP	0.275683	0.0913579	0.0913579	0.275683	0.00793607	0.00221474	0.0022147	0.0079361	0	-16304	0.585354	0.216293	0.216293	0.585354	0.0505172	0.021542	0.021542	0.0505172	0	-10806.5	0.0578701	/	0.0599745	/	0.168768	/	0.145393	/	Richard A Young	2010	20720539	GSE22562
5	RNA PolII S5P	0.393367	0.107984	0.107984	0.393367	0.0122264	0.00256848	0.0025685	0.0122264	0	-19400.5	0.610001	0.192217	0.192217	0.610001	0.0519072	0.0177968	0.0177968	0.0519072	0	-10054.4	0.0731639	/	0.0732872	/	0.185171	/	0.170043	/	Charles Lin	2010	20434984	GSE20530_GSM515662
6	RNA PolII	0.349172	0.173319	0.173319	0.349172	0.0142591	0.00496778	0.0049678	0.0142591	0	-29088.8	0.578027	0.266699	0.266699	0.578027	0.0543796	0.0281595	0.0281595	0.0543796	0	-12827.4	0.105439	/	0.138775	/	0.317815	/	0.255826	/	Charles Lin	2010	20434984	GSE20530_GSM515667
7	H3K4me2	0.344649	0.251957	0.251957	0.344649	0.0235925	0.0116581	0.0116581	0.0235925	0	-34727.8	0.583054	0.320652	0.320652	0.583054	0.0600508	0.0403526	0.0403526	0.0600508	0	-13653.3	0.126006	/	0.273516	/	0.476628	/	0.331929	/	Venugopalan Nair	2013	23028048	GSE18515_GSM461266
8	DHS	0.0699146	0.492425	0.492425	0.0699146	0.0150506	0.0630431	0.0630431	0.0150506	0	-37899.7	0.181687	0.655525	0.655525	0.181687	0.0567643	0.262249	0.262249	0.0567643	0	-7366.27	0.333861	/	0.501042	/	0.789229	/	0.604607	/	ENCODE DCC	2013	encodeproject.org	GSE37074_GSM1014154
9	H3K9ac	0.352008	0.408511	0.408511	0.352008	0.0392218	0.0235316	0.0235316	0.0392218	0	-50784.7	0.476722	0.385025	0.385025	0.476722	0.068092	0.0607682	0.0607682	0.068092	0	-13734.2	0.230496	/	0.420561	/	0.754717	/	0.519003	/	Krishanpal Karmodiya	2012	22920947	GSE31284_GSM775313
10	CpGi	0.598215	0.25917	0.25917	0.598215	0.0199052	0.0049524	0.0049524	0.0199052	0	-50166.5	0.744915	0.28841	0.28841	0.744915	0.0549108	0.0235132	0.0235132	0.0549108	0	-16273.3	0.145589	/	0.201708	/	0.530103	/	0.369218	/	UCSC Table Browser	2015	25428374
11	H3K4me3	0.516975	0.325428	0.325428	0.516975	0.0351351	0.0116274	0.0116274	0.0351351	0	-50100	0.61835	0.316569	0.316569	0.61835	0.0665718	0.03779	0.03779	0.0665718	0	-14000.3	0.190064	/	0.251866	/	0.657723	/	0.454464	/	Vibhor Kumar	2013	23352811	GSE38164_GSM936113
12	ES UMR	0.367632	0.335563	0.335564	0.367632	0.0230141	0.0119504	0.0119504	0.0230141	0	-51729	0.561722	0.349966	0.349966	0.561722	0.0610245	0.0457029	0.0457029	0.0610245	0	-14499.9	0.192209	/	0.285551	/	0.66417	/	0.457063	/	Dirk Schuebeler	2013	22170606	GSE30202
13	H3K36me3	0.0656647	0.131208	0.131208	0.0656647	0.0441114	0.0481552	0.0481552	0.0441114	0	-3156.07	0.135174	0.171182	0.171182	0.135174	0.0723783	0.0823102	0.0823102	0.0723783	0	-1299.84	0.0742889	/	0.268204	/	0.121551	/	0.102815	/	ENCODE DCC	2013	encodeproject.org	GSE31039_GSM1000125
14	5hmC	0.0893269	0.279672	0.279672	0.0893269	0.0321336	0.0705486	0.0705486	0.0321336	0	-11453.6	0.228738	0.478571	0.478571	0.228738	0.0658209	0.17794	0.17794	0.0658209	0	-6143.47	0.200858	/	0.450951	/	0.261496	/	0.269451	/	Keith E Szulwach	2013	23602153	GSE41545_GSM857136
15	5fC	0.0842716	0.0960488	0.0960488	0.0842716	0.0186783	0.0163952	0.0163952	0.0186783	0	-5866.44	0.283033	0.262165	0.262165	0.283033	0.0584903	0.072567	0.072567	0.0584903	0	-5230.52	0.0612101	/	0.178108	/	0.0795487	/	0.0910721	/	Keith E Szulwach	2013	23602153	GSE41545_GSM986287
16	ES LMR	0.0565407	0.0251926	0.0251926	0.0565407	0.0149611	0.0108122	0.0108122	0.0149611	0	-454.602	0.252819	0.134096	0.134096	0.252819	0.0552117	0.0411129	0.0411129	0.0552117	0	-2332.57	0.0219035	/	0.03819	/	0.0183939	/	0.0226784	/	Dirk Schuebeler	2013	22170606	GSE30202
17	H3K4me1	0.148051	0.389132	0.389132	0.148051	0.0443834	0.0677648	0.0677648	0.0443834	0	-23333.8	0.250782	0.457958	0.457958	0.250782	0.0735778	0.146063	0.146063	0.0735778	0	-7513.72	0.244419	/	0.597055	/	0.488196	/	0.387236	/	Richard A Young	2012	22297846	GSE27841_GSM687286
18	H2A.Z	0.0584706	0.0535074	0.0535074	0.0584706	0.0515702	0.0288685	0.0288685	0.0515702	0	-549.008	0.0936488	0.0856893	0.0856893	0.0936488	0.0675961	0.0625704	0.0625704	0.0675961	2.73448e-61	-139.452	0.0472172	/	0.0389968	/	0.0752821	/	0.0683041	/	Gangqing Hu	2013	23260488	GSE34483_GSM849928
19	Ac H2A.Z	0.0649797	0.033098	0.033098	0.0649797	0.0450649	0.0138113	0.0138113	0.0450649	0	-631.028	0.0995227	0.0522922	0.0522922	0.0995227	0.0641585	0.0338196	0.0338196	0.0641585	6.95073e-69	-156.94	0.0296734	/	0.0186916	/	0.0511046	/	0.0440122	/	Gangqing Hu	2013	23260488	GSE34483_GSM849929
20	H3K9me3	0.00871614	0.00805918	0.0080592	0.0087161	0.00811381	0.00653655	0.0065366	0.0081138	1.9e-06	-13.1495	0.0352012	0.0332282	0.0332282	0.0352012	0.0518894	0.0465195	0.0465195	0.0518894	1	-8.01301e-35	0.00959814	/	0.00981645	/	0.00436143	/	0.00528863	/	Hendrik Marks	2012	22541430	GSE23943_GSM850406
21	SOX2	0.0318383	0.00221474	0.0022147	0.0318383	0.00790146	0.000522924	0.0005229	0.0079015	0	-100.995	0.168952	0.0197116	0.0197116	0.168952	0.0511271	0.00627957	0.00627957	0.0511271	5.59383e-143	-327.548	0.00193369	/	0.00174813	/	0.00312885	/	0.00268914	/	Michael Lodato	2013	23437007	GSE35496_GSM1050291
22	Nanog	0.0224254	0.00335287	0.0033529	0.0224254	0.00631396	0.000892047	0.000892	0.006314	0	-131.948	0.12813	0.0314542	0.0314542	0.12813	0.0574788	0.0141361	0.0141361	0.0574788	2.73665e-123	-282.211	0.00319938	/	0.00248773	/	0.00331848	/	0.00493008	/	Chia-Lin Wei	2008	18555785	GSE11431_GSM288345
23	CTCF	0.016778	0.00952029	0.0095203	0.0167793	0.00494149	0.00279918	0.0027992	0.0049415	0	-324.503	0.18832	0.157074	0.157074	0.18832	0.0512612	0.0486314	0.0486314	0.0512612	0	-2693.76	0.00650424	/	0.0106233	/	0.0151702	/	0.010398	/	Chia-Lin Wei	2008	18555785	GSE11431_GSM288351
24	ESET	0.128279	0.0116889	0.0116889	0.128279	0.00861574	0.000692105	0.0006921	0.0086157	0	-1437.43	0.315336	0.04238	0.04238	0.315336	0.0516944	0.00743411	0.00743411	0.0516944	0	-1382.99	0.0078754	/	0.0137834	/	0.0171613	/	0.0134457	/	Mikael Huss	2009	19884257	GSE17642_GSM440256
25	bivalent_domain	0.757891	0.0799151	0.0799151	0.757891	0.0597717	0.00282994	0.0028299	0.0597717	0	-12351.5	0.802888	0.0663438	0.0663438	0.802888	0.0792478	0.0068146	0.0068146	0.0792478	0	-3252.44	0.0365644	/	0.0710684	/	0.189059	/	0.0990498	/	Tarjei S. Mikkelsen	2007	17603471	GSE12241
26	SUZ12	0.615255	0.174226	0.174	0.615	0.0375169	0.00479091	0.005	0.038	0	-28734.5	0.754619	0.156623	0.156623	0.754619	0.0674854	0.0151498	0.0151498	0.0674854	0	-7973.15	0.0776993	/	0.193841	/	0.369773	/	0.209304	/	Jun S Song	2012	22438827	GSE28325_GSM700554
27	H3K27me3	0.501329	0.1319	0.1319	0.501328	0.0719807	0.0096741	0.0096741	0.0719807	0	-14464	0.673188	0.125113	0.125113	0.673188	0.0849034	0.0175997	0.0175997	0.0849034	0	-4901.17	0.0566748	/	0.172258	/	0.268702	/	0.140552	/	Luciano Di Croce	2013	23104054	GSE41589_GSM1019772
28	EZH2	0.491115	0.0681032	0.0681032	0.491115	0.0357619	0.0024762	0.0024762	0.0357619	0	-10413.8	0.905153	0.0442104	0.0442104	0.905153	0.0595291	0.00422392	0.00422392	0.0595291	0	-2271.17	0.0225363	/	0.0865999	/	0.164217	/	0.0687522	/	Anton Valouev	2009	20064375	GSE18776_GSM480161
29	RNF2	0.814231	0.0840524	0.0840524	0.814231	0.0779719	0.00290684	0.0029068	0.0779719	0	-13115.5	0.85343	0.0539536	0.0539536	0.85343	0.0881977	0.00568822	0.00568822	0.0881977	0	-2601.06	0.0260873	/	0.116923	/	0.199678	/	0.078702	/	Stephen Taylor	2012	22325148	GSE23716_GSM585229
30	SMC3	0.048433	0.026423	0.026423	0.048433	0.00945626	0.00482936	0.0048294	0.0094563	0	-1520.22	0.239983	0.168506	0.168506	0.239983	0.0529793	0.0442104	0.0442104	0.0529793	0	-3597.64	0.0171923	/	0.0313319	/	0.0398218	/	0.0307458	/	Richard A Young	2010	20720539	GSE22562_GSM560343
31	SMC1	0.0734728	0.0527538	0.0527538	0.0734728	0.00821962	0.00553684	0.0055368	0.0082196	0	-4666.82	0.300256	0.249155	0.249155	0.300256	0.0517447	0.0546294	0.0546294	0.0517447	0	-6524.09	0.0321344	/	0.0595038	/	0.0851427	/	0.0657046	/	Richard A Young	2010	20720539	GSE22562_GSM560341
32	G4	0.025806	0.164783	0.164783	0.025806	0.00502658	0.035159	0.035159	0.0050266	0	-8127.75	0.162083	0.786776	0.786776	0.162083	0.0518751	0.395669	0.395669	0.0518751	0	-5321.34	0.109166	/	0.183083	/	0.230018	/	0.220509	/	Wong H.	2010	20725630	www.quadruplex.org
33	RNA PolII S2P	0.107983	0.0179486	0.0179486	0.107983	0.0136264	0.00164567	0.0016457	0.0136264	0	-1732.74	0.344389	0.0397612	0.0397612	0.344389	0.0599049	0.00791282	0.00791282	0.0599049	0	-1152.87	0.00910593	/	0.02992	/	0.0240827	/	0.0187343	/	Charles Lin	2010	20434984	GSE20530_GSM515663
34	REST	0.112419	0.0101663	0.0101663	0.112419	0.0105945	0.000830526	0.0008305	0.0105945	0	-1052.73	0.301746	0.0378745	0.0378745	0.301746	0.0568962	0.00765938	0.00765938	0.0568962	0	-1081.07	0.00706677	/	0.00705977	/	0.0171613	/	0.015597	/	Mads Lerdrup	2012	22396653	GSE48122_GSM1169011
35	SMARC4	0.133506	0.0077362	0.0077362	0.133506	0.0109573	0.000599825	0.0005998	0.0109573	0	-826.134	0.309112	0.0266107	0.0266107	0.309112	0.0467128	0.00422392	0.00422392	0.0467128	0	-948.491	0.00548465	/	0.00591676	/	0.0126102	/	0.0112944	/	Raja Jothi	2009	19279218	GSE14344_GSM359413
36	WDR5	0.481711	0.0135191	0.0135191	0.481711	0.0136392	0.000338363	0.0003384	0.0136392	0	-2388.81	0.775573	0.0330874	0.0330874	0.775573	0.0415375	0.00205564	0.00205564	0.0415375	0	-2167.2	0.00808635	/	0.0102199	/	0.0225657	/	0.0232162	/	Jonathan Monk	2011	21477851	GSE22934_GSM566279
37	KLF4	0.197339	0.0325751	0.0325751	0.197358	0.00650738	0.00103047	0.0010305	0.0065074	0	-5268.3	0.498057	0.125197	0.125197	0.498057	0.0479798	0.0131786	0.0131786	0.0479798	0	-6036.25	0.017579	/	0.0292476	/	0.0574571	/	0.051721	/	Chia-Lin Wei	2008	18555785	GSE11431_GSM288354
38	CHD4	0.103611	0.0377274	0.0377274	0.103611	0.00938945	0.0030914	0.0030914	0.0093895	0	-3889.56	0.285327	0.153357	0.153357	0.285327	0.0528799	0.0300462	0.0300462	0.0528799	0	-4503.15	0.0308336	/	0.0303906	/	0.0506305	/	0.0528863	/	Richard A Young	2012	22297846	GSE27841_GSM687284
39	E2F1	0.141577	0.0384042	0.0384042	0.141585	0.0050485	0.00136883	0.0013688	0.0050485	0	-5922.31	0.478303	0.183206	0.183206	0.478303	0.0481026	0.0198524	0.0198524	0.0481026	0	-8662.36	0.0246458	/	0.0258858	/	0.0683607	/	0.0618501	/	Chia-Lin Wei	2008	18555785	GSE11431_GSM288349
40	MED1	0.121763	0.0689645	0.0689645	0.121763	0.0075494	0.00392193	0.0039219	0.0075494	0	-8631.73	0.43238	0.246339	0.246339	0.43238	0.0507225	0.0354246	0.0354246	0.0507225	0	-9480.32	0.0391309	/	0.0714046	/	0.112733	/	0.100394	/	Richard A Young	2010	20720539	GSE22562_GSM560347
41	OCT4	0.0935678	0.0621818	0.0621818	0.0935678	0.0143859	0.0075055	0.0075055	0.0143859	0	-4998.57	0.190244	0.150935	0.150935	0.190244	0.0542285	0.0472798	0.0472798	0.0542285	0	-2545.54	0.0428928	/	0.0485443	/	0.0996492	/	0.0941198	/	Tae-Wook Kang	2012	22608532	GSE36388_GSM892276
42	MOF	0.153304	0.134391	0.134391	0.153304	0.0106695	0.00776696	0.007767	0.0106695	0	-16683.4	0.392213	0.309248	0.309248	0.392213	0.0533059	0.0562627	0.0562627	0.0533059	0	-9735.92	0.08343	/	0.149062	/	0.196454	/	0.186088	/	Yali Dou	2012	22862943	GSE37268_GSM915227/8
43	ES FMR	0.354084	0.6583	0.6583	0.354084	0.364762	0.980037	0.980037	0.364762	1	0	0.602169	0.975023	0.975023	0.602169	0.300011	0.993242	0.993242	0.300011	0.999727	-0.000272742	0.798404	/	0.697909	/	0.338011	/	0.551094	/	Dirk Schuebeler	2013	22170606	GSE30202
44	3UTR	/	0.0127655	/	/	/	0.0069	/	/	/	/	/	0.0117	/	/	/	0.0069	/	/	/	/	0.00805119	1	0.0247428	5.047e-43	0.0143169	0.06799	0.0073503	1	UCSC-RefSeq	2015	25428374	19689956
45	5UTR	/	0.0188253	/	/	/	0.0007	/	/	/	/	/	0.0151	/	/	/	0.0008	/	/	/	/	0.0112154	1	0.0120352	1	0.0393477	6.81e-53	0.0278774	1.382e-13	UCSC-RefSeq	2015	25428374	19689956
46	exons	/	0.086467	/	/	/	0.0114	/	/	/	/	/	0.049	/	/	/	0.0111	/	/	/	/	0.0429983	1	0.140254	7.857e-141	0.128378	2.763e-57	0.0859627	0.5884	UCSC-RefSeq	2015	25428374	19689956
47	Intergenic	/	0.313401	/	/	/	0.6221	/	/	/	/	/	0.3991	/	/	/	0.6225	/	/	/	/	0.450585	0	0.217441	1	0.130084	1	0.26488	1	UCSC-RefSeq	2015	25428374	19689956
48	Introns	/	0.400514	/	/	/	0.3384	/	/	/	/	/	0.4079	/	/	/	0.3391	/	/	/	/	0.386246	1	0.454582	8.615e-53	0.355362	1	0.407494	0.05033	UCSC-RefSeq	2015	25428374	19689956
49	Promoters-TSS	/	0.14608	/	/	/	0.0094	/	/	/	/	/	0.0978	/	/	/	0.0096	/	/	/	/	0.087649	1	0.106838	1	0.311368	0	0.191108	5.47e-47	UCSC-RefSeq	2015	25428374	19689956
50	TTS	/	0.0181793	/	/	/	0.0097	/	/	/	/	/	0.0164	/	/	/	0.0086	/	/	/	/	0.0102661	1	0.0390641	2.469e-88	0.016308	0.948	0.0122804	1	UCSC-RefSeq	2015	25428374	19689956
51	Replication Timing Early	/	0.822267	/	/	/	0.41	/	/	/	/	/	/	/	/	/	/	/	/	/	/	0.703	/	0.967	/	0.903	/	0.857	/	David M. Gilbert	2010	19952138	GSE18019_GSM450274
52	Replication Timing Late	/	0.167413	/	/	/	0.543	/	/	/	/	/	/	/	/	/	/	/	/	/	/	0.286	/	0.022	/	0.088	/	0.134	/	David M. Gilbert	2010	19952138	GSE18019_GSM450274

## Sheet: description
Sn	Recall (also called Sensitivity (Sn), True positive rate (TPR), coverage). Proportion of IS or IZ overlapped by the considered genomic feature.
PPV	Precision (also called Positive Predictive Value (PPV)). Proportion of marks/factors that overlap at least one initiation site. This number tells us how reliable it would be to predict that there is an IS or IZ just because we see the considered epigenetic mark.

## Sheet: Fig6
Figure 6	marks/factors	PMID	GEO_GSE
	H3	23101626	GSE39513
	H3.1	20211137	GSE16893
	H3.2	20211137	GSE16893
	H3.3	20211137	GSE16893
	H2AZ	23260488	GSE34483
	MNase1	23100115	GSE38564
	MNase2	23085715	GSE40910
	H3K64ac	24668167	GSE35355
