# Supplementary material for: The chromatin environment shapes DNA replication origin organization and defines origin classes
Source: HighWire-hosted journal article supplement (doi:10.1101/gr.192799.115), 2015-11-11
Supplement: Table_S2.xlsx [file Table_S2.xlsx]

## Sheet: all 8nt
Column headers
seq	pattern sequence
id	pattern identifier
occ	pattern occurrences
over	overlapping occurrences (discarded)
chi2	observed chi-square
df	degrees of freedom
Pval	P-value (probability for one word to be a false positive)
Eval	E-value; expected number of false positives (Eval = Pval * nb_tests)
sig	Significance (sig = -log10(Eval))
rank	rank of the pattern according to sorting criterion
#seq	id	occ	over	chi2	df	Pval	Eval	sig	rank
acacacac	acacacac	58130	119763	70917.1	40	0.0e+00	0	300	1
gtgtgtgt	gtgtgtgt	57925	119220	67958.6	40	0.0e+00	0	300	2
cacacaca	cacacaca	61040	120155	67142.9	40	0.0e+00	0	300	3
tgtgtgtg	tgtgtgtg	60588	119391	64651.2	40	0.0e+00	0	300	4
tgtgtgta	tgtgtgta	12099	0	5187.1	40	0.0e+00	0	300	5
tacacaca	tacacaca	12279	0	4862.2	40	0.0e+00	0	300	6
atgtgtgt	atgtgtgt	13002	0	3312.9	40	0.0e+00	0	300	7
acacacat	acacacat	13012	0	3149.6	40	0.0e+00	0	300	8
atacacac	atacacac	8567	0	3021.5	40	0.0e+00	0	300	9
gtgtgtat	gtgtgtat	9049	0	3002.7	40	0.0e+00	0	300	10
gggggggg	gggggggg	13187	35305	2869.6	40	0.0e+00	0	300	11
gggaggga	gggaggga	22079	6821	2825.2	40	0.0e+00	0	300	12
agggaggg	agggaggg	22024	6793	2709.1	40	0.0e+00	0	300	13
cgtgtgtg	cgtgtgtg	5734	0	2699.6	40	0.0e+00	0	300	14
cccccccc	cccccccc	13279	35032	2696.2	40	0.0e+00	0	300	15
cacacacg	cacacacg	5552	0	2687.3	40	0.0e+00	0	300	16
gagggagg	gagggagg	22778	7005	2601.9	40	0.0e+00	0	300	17
ggagggag	ggagggag	23158	7052	2452.8	40	0.0e+00	0	300	18
tgtgtatg	tgtgtatg	8692	182	2433.7	40	0.0e+00	0	300	19
acatacac	acatacac	7006	133	2397.9	40	0.0e+00	0	300	20
catacaca	catacaca	8720	141	2372.3	40	0.0e+00	0	300	21
tgtgtgtt	tgtgtgtt	9110	16	2310.1	40	0.0e+00	0	300	22
gtgtatgt	gtgtatgt	7049	161	2310.1	40	0.0e+00	0	300	23
tccctccc	tccctccc	21581	6396	2269.8	40	0.0e+00	0	300	24
acacatac	acacatac	7335	146	2225.6	40	0.0e+00	0	300	25
aacacaca	aacacaca	8825	10	2198.9	40	0.0e+00	0	300	26
gtatgtgt	gtatgtgt	7179	142	2171.6	40	0.0e+00	0	300	27
cacacata	cacacata	9114	0	2159.7	40	0.0e+00	0	300	28
ccctccct	ccctccct	21556	6296	2145.9	40	0.0e+00	0	300	29
cctccctc	cctccctc	22432	6535	2077.1	40	0.0e+00	0	300	30
ctccctcc	ctccctcc	23091	6669	2058.3	40	0.0e+00	0	300	31
tatgtgtg	tatgtgtg	9282	0	2025.8	40	0.0e+00	0	300	32
cacataca	cacataca	8662	154	1987.0	40	0.0e+00	0	300	33
gcacacac	gcacacac	12086	0	1953.2	40	0.0e+00	0	300	34
tgtatgtg	tgtatgtg	8536	142	1923.4	40	0.0e+00	0	300	35
cccacccc	cccacccc	28706	4804	1911.5	40	0.0e+00	0	300	36
cacacact	cacacact	8669	0	1902.0	40	0.0e+00	0	300	37
ggggtggg	ggggtggg	28257	4894	1887.9	40	0.0e+00	0	300	38
tttacatt	tttacatt	5034	5	1851.1	40	0.0e+00	0	300	39
gggtgggg	gggtgggg	29196	4831	1835.5	40	0.0e+00	0	300	40
ctgtgtgt	ctgtgtgt	11247	0	1823.4	40	0.0e+00	0	300	41
ttacattt	ttacattt	5380	9	1771.1	40	0.0e+00	0	300	42
ccctcccc	ccctcccc	27944	3220	1759.3	40	0.0e+00	0	300	43
acacacag	acacacag	11441	0	1758.6	40	0.0e+00	0	300	44
gggggtgg	gggggtgg	21298	2321	1748.3	40	0.0e+00	0	300	45
atttacat	atttacat	4390	4	1747.3	40	0.0e+00	0	300	46
attaggta	attaggta	1923	0	1650.9	39	0.0e+00	0	300	47
gtgtgtgc	gtgtgtgc	11934	0	1639.6	40	0.0e+00	0	300	48
acccaccc	acccaccc	9953	1641	1632.0	40	0.0e+00	0	300	49
cacgcaca	cacgcaca	4143	282	1614.4	40	0.0e+00	0	300	50
cacacgca	cacacgca	3984	278	1613.5	39	0.0e+00	0	300	51
agtgtgtg	agtgtgtg	8880	0	1607.7	40	0.0e+00	0	300	52
aaatgtaa	aaatgtaa	5352	6	1603.8	40	0.0e+00	0	300	53
cccctccc	cccctccc	28543	3059	1591.0	40	0.0e+00	0	300	54
aatgctat	aatgctat	2779	0	1589.5	40	0.0e+00	0	300	55
ccaccccc	ccaccccc	21691	2341	1586.8	40	0.0e+00	0	300	56
gcgtgtgt	gcgtgtgt	3760	0	1581.8	40	0.0e+00	0	300	57
acacacgc	acacacgc	3744	0	1571.7	39	0.0e+00	0	300	58
tttttttt	tttttttt	25272	72112	1571.4	40	0.0e+00	0	300	59
ccccaccc	ccccaccc	29352	4752	1569.3	40	0.0e+00	0	300	60
taggtatt	taggtatt	2103	0	1546.0	39	0.0e+00	0	300	61
ggtggggg	ggtggggg	21953	2316	1540.4	40	0.0e+00	0	300	62
acacacaa	acacacaa	8071	6	1531.9	40	0.0e+00	0	300	63
ggggaggg	ggggaggg	27814	2921	1526.9	40	0.0e+00	0	300	64
acgcacac	acgcacac	3343	258	1526.8	39	0.0e+00	0	300	65
gacacaca	gacacaca	8126	0	1519.0	40	0.0e+00	0	300	66
gggtgggt	gggtgggt	10242	1580	1515.2	40	0.0e+00	0	300	67
aaaaaaaa	aaaaaaaa	25075	72522	1510.9	40	0.0e+00	0	300	68
atgtaaat	atgtaaat	4416	5	1509.0	40	0.0e+00	0	300	69
acacgcac	acacgcac	3292	284	1493.9	39	0.0e+00	0	300	70
ttaggtat	ttaggtat	2137	0	1491.8	39	0.0e+00	0	300	71
ggtgtgtg	ggtgtgtg	9874	27	1460.4	40	0.0e+00	0	300	72
aatgtaaa	aatgtaaa	4853	6	1451.3	40	0.0e+00	0	300	73
gaaatgta	gaaatgta	3975	0	1441.7	40	0.0e+00	0	300	74
gggagggg	gggagggg	28213	2847	1436.4	40	0.0e+00	0	300	75
cccccacc	cccccacc	21813	2241	1432.1	40	0.0e+00	0	300	76
tcacacac	tcacacac	7108	0	1425.1	40	0.0e+00	0	300	77
tacctaat	tacctaat	1831	0	1414.3	39	0.0e+00	0	300	78
tggggggg	tggggggg	11361	0	1413.1	40	0.0e+00	0	300	79
tacatttc	tacatttc	4332	0	1410.3	40	0.0e+00	0	300	80
gtgcgtgt	gtgcgtgt	3344	229	1407.3	39	0.0e+00	0	300	81
tgcgtgtg	tgcgtgtg	3951	236	1405.6	40	0.0e+00	0	300	82
cacacacc	cacacacc	9979	22	1393.9	40	0.0e+00	0	300	83
ggccagcc	ggccagcc	11332	0	1387.0	40	0.0e+00	0	300	84
ggctggcc	ggctggcc	11294	0	1384.2	40	0.0e+00	0	300	85
tgtgcgtg	tgtgcgtg	4000	229	1369.2	40	0.0e+00	0	300	86
tgtgtgtc	tgtgtgtc	8098	0	1359.9	40	0.0e+00	0	300	87
gtgtgtga	gtgtgtga	7090	0	1352.5	40	0.0e+00	0	300	88
gcatataa	gcatataa	2141	0	1340.6	39	0.0e+00	0	300	89
cgcacaca	cgcacaca	4575	0	1333.6	40	0.0e+00	0	300	90
tgggtggg	tgggtggg	13382	1592	1333.5	40	0.0e+00	0	300	91
ttgtgtgt	ttgtgtgt	7918	4	1331.5	40	0.0e+00	0	300	92
tagctcct	tagctcct	4535	3	1314.4	40	0.0e+00	0	300	93
cgactagg	cgactagg	1256	0	1307.4	39	0.0e+00	0	300	94
gtgtgcgt	gtgtgcgt	3260	213	1302.2	39	0.0e+00	0	300	95
ccccccca	ccccccca	11260	0	1299.9	40	0.0e+00	0	300	96
gggggagg	gggggagg	21128	982	1298.3	40	0.0e+00	0	300	97
aataccta	aataccta	2059	0	1291.0	39	0.0e+00	0	300	98
cctccccc	cctccccc	21023	999	1284.1	40	0.0e+00	0	300	99
gtgggtgg	gtgggtgg	12258	1620	1283.0	40	0.0e+00	0	300	100
ggcatata	ggcatata	2104	0	1274.9	39	0.0e+00	0	300	101
atacctaa	atacctaa	1979	0	1273.0	39	0.0e+00	0	300	102
tgtgtgcg	tgtgtgcg	4562	0	1262.1	40	0.0e+00	0	300	103
tctgtgtg	tctgtgtg	9692	0	1247.3	40	0.0e+00	0	300	104
atagcatt	atagcatt	2745	0	1241.1	40	0.0e+00	0	300	105
tatgcagc	tatgcagc	2859	0	1221.1	39	0.0e+00	0	300	106
atatgcag	atatgcag	3329	0	1216.2	40	0.0e+00	0	300	107
cacacaga	cacacaga	9736	0	1212.5	40	0.0e+00	0	300	108
gtgggggg	gtgggggg	12926	334	1205.7	40	0.0e+00	0	300	109
ttatatgc	ttatatgc	2130	0	1200.5	39	0.0e+00	0	300	110
ccacccac	ccacccac	12262	1580	1190.4	40	0.0e+00	0	300	111
taggccat	taggccat	2489	0	1180.8	39	0.0e+00	0	300	112
aggtattt	aggtattt	3074	0	1172.1	40	0.0e+00	0	300	113
tataaagt	tataaagt	2840	0	1162.1	40	0.0e+00	0	300	114
cccaccca	cccaccca	13169	1533	1157.6	40	0.0e+00	0	300	115
ccgactag	ccgactag	1228	0	1128.2	39	0.0e+00	0	300	116
ggggggag	ggggggag	11211	118	1126.4	40	0.0e+00	0	300	117
ggggggga	ggggggga	8117	0	1124.6	40	0.0e+00	0	300	118
aggagcta	aggagcta	4521	0	1124.2	40	0.0e+00	0	300	119
tatagggt	tatagggt	1827	0	1118.8	39	0.0e+00	0	300	120
ataaagtt	ataaagtt	3060	0	1116.7	40	0.0e+00	0	300	121
gtactggt	gtactggt	2140	0	1106.4	39	0.0e+00	0	300	122
tccccccc	tccccccc	8166	0	1102.4	40	0.0e+00	0	300	123
gctgcata	gctgcata	2730	0	1086.3	39	0.0e+00	0	300	124
ggttagtt	ggttagtt	2532	0	1085.7	39	0.0e+00	0	300	125
gccgacta	gccgacta	1174	0	1084.3	39	0.0e+00	0	300	126
agacacac	agacacac	7489	0	1082.2	40	0.0e+00	0	300	127
tagttcat	tagttcat	2508	0	1079.9	40	0.0e+00	0	300	128
agttcata	agttcata	2628	1	1076.3	40	0.0e+00	0	300	129
tatatgcc	tatatgcc	2192	0	1074.4	39	0.0e+00	0	300	130
aactttat	aactttat	3083	0	1073.8	40	0.0e+00	0	300	131
ctttatat	ctttatat	3031	0	1067.2	40	0.0e+00	0	300	132
ccccccac	ccccccac	12460	330	1063.9	40	0.0e+00	0	300	133
gtgtgtct	gtgtgtct	7623	0	1058.1	40	0.0e+00	0	300	134
gttagttc	gttagttc	2247	0	1056.2	39	0.0e+00	0	300	135
caatgcta	caatgcta	2341	0	1052.4	39	0.0e+00	0	300	136
atataaag	atataaag	3082	0	1050.7	40	0.0e+00	0	300	137
ctcccccc	ctcccccc	11020	159	1044.0	40	0.0e+00	0	300	138
ggggggtg	ggggggtg	9924	314	1043.6	40	0.0e+00	0	300	139
ggggcata	ggggcata	2573	0	1041.4	39	0.0e+00	0	300	140
tacatatg	tacatatg	3634	0	1034.6	40	0.0e+00	0	300	141
tggttagt	tggttagt	2609	0	1033.5	39	0.0e+00	0	300	142
actttata	actttata	2839	0	1031.2	40	0.0e+00	0	300	143
gtgtgttt	gtgtgttt	6199	0	1030.2	40	0.0e+00	0	300	144
gaggcagg	gaggcagg	16552	68	1023.8	40	0.0e+00	0	300	145
acagacac	acagacac	7100	218	1021.2	40	0.0e+00	0	300	146
acacactc	acacactc	5617	0	1018.7	40	0.0e+00	0	300	147
aataaaaa	aataaaaa	9573	260	1012.0	40	0.0e+00	0	300	148
ctgcatat	ctgcatat	3193	0	1010.1	40	0.0e+00	0	300	149
actaggcc	actaggcc	2463	0	1007.8	39	0.0e+00	0	300	150
ttttttta	ttttttta	12620	0	1006.4	40	0.0e+00	0	300	151
ttagttca	ttagttca	2565	0	1006.4	40	0.0e+00	0	300	152
tttttatt	tttttatt	9587	193	1003.5	40	0.0e+00	0	300	153
gggggggt	gggggggt	7019	0	993.7	40	0.0e+00	0	300	154
aaatacct	aaatacct	3077	0	990.7	40	0.0e+00	0	300	155
gtgtctgt	gtgtctgt	7174	139	983.9	40	0.0e+00	0	300	156
ttttatta	ttttatta	5277	0	977.0	40	0.0e+00	0	300	157
caaaagtc	caaaagtc	3040	0	975.8	39	0.0e+00	0	300	158
actggtta	actggtta	2368	0	974.5	39	0.0e+00	0	300	159
tatgaact	tatgaact	2455	0	966.3	39	0.0e+00	0	300	160
cctagtcg	cctagtcg	1173	0	966.0	39	0.0e+00	0	300	161
tagcattg	tagcattg	2225	0	965.1	39	0.0e+00	0	300	162
tggggcat	tggggcat	4120	1	963.0	40	0.0e+00	0	300	163
gccctggc	gccctggc	11369	43	961.4	40	0.0e+00	0	300	164
aaacttta	aaacttta	3524	1	960.6	40	0.0e+00	0	300	165
ctataggg	ctataggg	1975	0	959.4	39	0.0e+00	0	300	166
acacagac	acacagac	6629	202	957.8	40	0.0e+00	0	300	167
gccagggc	gccagggc	11405	47	951.1	40	0.0e+00	0	300	168
gactaggc	gactaggc	2524	0	950.3	39	0.0e+00	0	300	169
tttattag	tttattag	2835	0	946.5	40	0.0e+00	0	300	170
atagggtt	atagggtt	2263	0	944.4	39	0.0e+00	0	300	171
acctatag	acctatag	1828	0	944.2	39	0.0e+00	0	300	172
cacccccc	cacccccc	9830	322	944.0	40	0.0e+00	0	300	173
aactaacc	aactaacc	2444	0	943.4	39	0.0e+00	0	300	174
taaaaaaa	taaaaaaa	12577	0	942.3	40	0.0e+00	0	300	175
tagtcggc	tagtcggc	1032	0	941.4	39	0.0e+00	0	300	176
catataaa	catataaa	3306	0	934.6	40	0.0e+00	0	300	177
ccccctcc	ccccctcc	18822	828	932.0	40	0.0e+00	0	300	178
tactggtt	tactggtt	2480	0	929.3	39	0.0e+00	0	300	179
cctgcctc	cctgcctc	18421	32	925.1	40	0.0e+00	0	300	180
accctata	accctata	1727	0	924.7	39	0.0e+00	0	300	181
atggccga	atggccga	1587	0	924.5	39	0.0e+00	0	300	182
atggccta	atggccta	2439	2	920.4	39	0.0e+00	0	300	183
gccagcct	gccagcct	11651	0	919.6	40	0.0e+00	0	300	184
ggaggggg	ggaggggg	18549	824	917.3	40	0.0e+00	0	300	185
ggcctagt	ggcctagt	2516	0	916.1	39	0.0e+00	0	300	186
aaacacac	aaacacac	6162	0	916.0	40	0.0e+00	0	300	187
atgaacta	atgaacta	2548	0	915.7	39	0.0e+00	0	300	188
tttatatg	tttatatg	3264	0	914.8	40	0.0e+00	0	300	189
tgcagcta	tgcagcta	3303	0	914.6	40	0.0e+00	0	300	190
taaccagt	taaccagt	2295	0	910.9	39	0.0e+00	0	300	191
tgcacaca	tgcacaca	9109	0	908.8	40	0.0e+00	0	300	192
ttttttat	ttttttat	5811	42	908.0	40	0.0e+00	0	300	193
gaactaac	gaactaac	2130	0	904.0	39	0.0e+00	0	300	194
gggttgca	gggttgca	3173	0	903.9	39	0.0e+00	0	300	195
acatatgc	acatatgc	3190	0	902.9	40	0.0e+00	0	300	196
gctggcct	gctggcct	11305	0	901.0	40	0.0e+00	0	300	197
gcatatgt	gcatatgt	3085	0	899.6	40	0.0e+00	0	300	198
cccccccg	cccccccg	4528	0	898.1	39	0.0e+00	0	300	199
accccccc	accccccc	6952	0	897.9	40	0.0e+00	0	300	200
gggcatat	gggcatat	1991	0	894.0	39	0.0e+00	0	300	201
tattaggt	tattaggt	1452	0	888.9	39	0.0e+00	0	300	202
gcaaactt	gcaaactt	2749	0	887.8	39	0.0e+00	0	300	203
cggggggg	cggggggg	4662	0	883.8	39	0.0e+00	0	300	204
gagtgtgt	gagtgtgt	5732	0	880.3	40	0.0e+00	0	300	205
ccctatag	ccctatag	1904	0	878.0	39	0.0e+00	0	300	206
atgcagct	atgcagct	3952	0	877.5	40	0.0e+00	0	300	207
gggtactg	gggtactg	3060	0	875.9	39	0.0e+00	0	300	208
aggccatc	aggccatc	4683	0	874.8	40	0.0e+00	0	300	209
ctccccct	ctccccct	11265	656	873.2	40	0.0e+00	0	300	210
ccggcata	ccggcata	815	0	871.8	39	0.0e+00	0	300	211
ctagtcgg	ctagtcgg	1181	0	871.8	39	0.0e+00	0	300	212
tgaactaa	tgaactaa	2525	0	868.3	39	0.0e+00	0	300	213
gtctgtgt	gtctgtgt	6729	138	867.0	40	0.0e+00	0	300	214
ctcccctc	ctcccctc	13742	2024	862.7	40	0.0e+00	0	300	215
ggaggcag	ggaggcag	15581	60	860.8	40	0.0e+00	0	300	216
taaagttt	taaagttt	3408	2	860.4	40	0.0e+00	0	300	217
ggggtact	ggggtact	2189	0	857.5	39	0.0e+00	0	300	218
tatgcccc	tatgcccc	2458	0	856.4	39	0.0e+00	0	300	219
cggcatag	cggcatag	839	0	852.6	39	0.0e+00	0	300	220
accagtac	accagtac	2104	2	849.8	39	0.0e+00	0	300	221
aagtttgc	aagtttgc	2803	0	849.0	39	0.0e+00	0	300	222
ataaaaaa	ataaaaaa	5887	61	847.8	40	0.0e+00	0	300	223
ctggttag	ctggttag	2931	0	847.4	39	0.0e+00	0	300	224
gtgggggt	gtgggggt	10701	964	846.7	40	0.0e+00	0	300	225
aaccagta	aaccagta	2361	1	845.6	39	0.0e+00	0	300	226
tacccacc	tacccacc	4124	0	845.0	40	0.0e+00	0	300	227
ccagcctg	ccagcctg	14466	0	841.5	40	0.0e+00	0	300	228
aaccctat	aaccctat	2094	0	840.5	39	0.0e+00	0	300	229
cagctaga	cagctaga	3570	0	839.9	40	0.0e+00	0	300	230
aaaagtcc	aaaagtcc	3327	0	839.9	40	0.0e+00	0	300	231
ccattggg	ccattggg	2694	0	838.4	39	0.0e+00	0	300	232
cacagaca	cacagaca	8496	198	836.7	40	0.0e+00	0	300	233
actaacca	actaacca	2536	0	836.4	39	0.0e+00	0	300	234
ccaaaagt	ccaaaagt	3067	0	827.6	40	0.0e+00	0	300	235
cagcctgg	cagcctgg	15032	0	826.1	40	0.0e+00	0	300	236
ctaggcca	ctaggcca	3766	0	823.4	39	0.0e+00	0	300	237
aggccagc	aggccagc	11212	0	818.2	40	0.0e+00	0	300	238
aggctggc	aggctggc	11524	0	817.4	40	0.0e+00	0	300	239
atgcacac	atgcacac	5580	0	817.3	40	0.0e+00	0	300	240
tatgtatc	tatgtatc	2053	0	817.0	39	0.0e+00	0	300	241
gtaaatga	gtaaatga	2766	0	815.7	40	0.0e+00	0	300	242
tgggggtg	tgggggtg	14086	1132	807.6	40	0.0e+00	0	300	243
catatgta	catatgta	3556	0	804.3	40	0.0e+00	0	300	244
tgtctgtg	tgtctgtg	8418	156	804.2	40	0.0e+00	0	300	245
tcccctcc	tcccctcc	15571	1842	803.6	40	0.0e+00	0	300	246
agggggag	agggggag	11141	681	803.0	40	0.0e+00	0	300	247
cctatagg	cctatagg	3070	0	802.8	39	0.0e+00	0	300	248
cccctgta	cccctgta	3121	0	801.0	39	0.0e+00	0	300	249
aaagtttg	aaagtttg	3942	0	798.4	40	0.0e+00	0	300	250
tcggccat	tcggccat	1529	0	797.6	39	0.0e+00	0	300	251
acccccac	acccccac	10538	982	794.1	40	0.0e+00	0	300	252
ggtactgg	ggtactgg	3283	1	793.2	39	0.0e+00	0	300	253
tgatacat	tgatacat	2094	0	793.1	39	0.0e+00	0	300	254
caggctgg	caggctgg	14369	0	790.9	40	0.0e+00	0	300	255
ccaggctg	ccaggctg	15174	0	790.8	40	0.0e+00	0	300	256
ctggggca	ctggggca	7553	0	789.7	40	0.0e+00	0	300	257
tagggttg	tagggttg	2607	0	784.8	39	0.0e+00	0	300	258
ttattagg	ttattagg	1764	0	780.6	39	0.0e+00	0	300	259
tttgtgtg	tttgtgtg	6855	0	776.0	40	0.0e+00	0	300	260
cagacaca	cagacaca	9093	226	773.5	40	0.0e+00	0	300	261
cccactcc	cccactcc	10123	37	772.9	40	0.0e+00	0	300	262
atgtatca	atgtatca	2056	0	768.5	39	0.0e+00	0	300	263
gatggccg	gatggccg	2045	0	768.5	39	0.0e+00	0	300	264
gcagctag	gcagctag	3658	0	768.2	39	0.0e+00	0	300	265
tcatttac	tcatttac	2897	0	767.5	40	0.0e+00	0	300	266
ggctgtcc	ggctgtcc	8007	0	765.9	40	0.0e+00	0	300	267
agtacccc	agtacccc	2178	0	763.4	39	0.0e+00	0	300	268
aatgggcc	aatgggcc	2475	0	761.0	39	0.0e+00	0	300	269
gatggcct	gatggcct	4428	0	759.6	40	0.0e+00	0	300	270
ctataggt	ctataggt	1693	0	759.4	39	0.0e+00	0	300	271
taataaaa	taataaaa	5230	0	758.9	40	0.0e+00	0	300	272
catgcaca	catgcaca	6308	56	758.0	40	0.0e+00	0	300	273
agctgcat	agctgcat	3802	0	756.6	40	0.0e+00	0	300	274
ctaaccag	ctaaccag	2792	0	755.3	39	0.0e+00	0	300	275
gcctggtc	gcctggtc	7457	0	755.1	40	0.0e+00	0	300	276
cccagcac	cccagcac	12661	12	754.9	40	0.0e+00	0	300	277
agggttgc	agggttgc	2949	0	753.8	39	0.0e+00	0	300	278
ttttttaa	ttttttaa	13062	0	752.0	40	0.0e+00	0	300	279
acatgcac	acatgcac	4457	34	750.1	40	0.0e+00	0	300	280
caaacttt	caaacttt	4054	0	749.4	40	0.0e+00	0	300	281
ggcatagt	ggcatagt	1916	0	745.6	39	0.0e+00	0	300	282
gatacata	gatacata	2150	0	743.5	39	0.0e+00	0	300	283
cctcccct	cctcccct	14611	1903	741.8	40	0.0e+00	0	300	284
catatgca	catatgca	3953	4	739.1	40	0.0e+00	0	300	285
ggccgact	ggccgact	1650	0	738.0	39	0.0e+00	0	300	286
cacctata	cacctata	2166	0	736.4	39	0.0e+00	0	300	287
cccaatgg	cccaatgg	2609	0	734.8	39	0.0e+00	0	300	288
tgtgtctg	tgtgtctg	9124	147	732.2	40	0.0e+00	0	300	289
gcagaggc	gcagaggc	12682	577	732.0	40	0.0e+00	0	300	290
ggcccatt	ggcccatt	2592	0	731.6	39	0.0e+00	0	300	291
cagtaccc	cagtaccc	3014	0	730.7	39	0.0e+00	0	300	292
tgttgttc	tgttgttc	3285	0	730.5	40	0.0e+00	0	300	293
gatagcat	gatagcat	2095	0	729.9	39	0.0e+00	0	300	294
cacactca	cacactca	6370	51	729.5	40	0.0e+00	0	300	295
gtccaatg	gtccaatg	1981	1	727.2	39	0.0e+00	0	300	296
ccactccc	ccactccc	9278	28	726.6	40	0.0e+00	0	300	297
ggtccatc	ggtccatc	2297	0	724.1	39	0.0e+00	0	300	298
tagctgca	tagctgca	3149	0	723.2	39	0.0e+00	0	300	299
gtgctggg	gtgctggg	12449	6	722.2	40	0.0e+00	0	300	300
acactcac	acactcac	4889	48	720.3	40	0.0e+00	0	300	301
atccactt	atccactt	3574	0	719.2	40	0.0e+00	0	300	302
ctaataaa	ctaataaa	2697	0	718.2	40	0.0e+00	0	300	303
tgccccag	tgccccag	7681	0	717.0	40	0.0e+00	0	300	304
tctagctg	tctagctg	3521	0	716.7	40	0.0e+00	0	300	305
cttttttt	cttttttt	13668	0	715.7	40	0.0e+00	0	300	306
gtcggcca	gtcggcca	1587	0	713.3	39	0.0e+00	0	300	307
ggactttt	ggactttt	3139	0	713.3	40	0.0e+00	0	300	308
atgcccca	atgcccca	3962	1	713.0	40	0.0e+00	0	300	309
tcccagca	tcccagca	13569	0	711.2	40	0.0e+00	0	300	310
tccattgg	tccattgg	3002	0	709.3	39	0.0e+00	0	300	311
agtcggcc	agtcggcc	1571	0	708.4	39	0.0e+00	0	300	312
tggccgac	tggccgac	1744	0	705.9	39	0.0e+00	0	300	313
tttattta	tttattta	10705	2727	703.6	40	0.0e+00	0	300	314
caacccta	caacccta	2501	0	703.3	39	0.0e+00	0	300	315
tatgcaat	tatgcaat	1676	0	702.7	39	0.0e+00	0	300	316
ttaaaaaa	ttaaaaaa	12881	0	702.4	40	0.0e+00	0	300	317
ccctggct	ccctggct	11213	0	700.9	40	0.0e+00	0	300	318
ctagctgc	ctagctgc	3630	2	697.7	39	0.0e+00	0	300	319
gagtgggt	gagtgggt	5376	0	696.8	40	0.0e+00	0	300	320
gaccaggc	gaccaggc	7331	0	696.8	40	0.0e+00	0	300	321
gttgttcc	gttgttcc	2696	0	695.6	39	0.0e+00	0	300	322
tatgccgg	tatgccgg	740	0	694.3	39	0.0e+00	0	300	323
gcctagtc	gcctagtc	2492	0	691.5	39	0.0e+00	0	300	324
gcaatggt	gcaatggt	2052	0	687.5	39	0.0e+00	0	300	325
cacacaaa	cacacaaa	6793	0	686.9	40	0.0e+00	0	300	326
cctctgcc	cctctgcc	14976	635	686.5	40	0.0e+00	0	300	327
acctaata	acctaata	1441	1	685.8	39	0.0e+00	0	300	328
ccagggct	ccagggct	11265	0	684.6	40	0.0e+00	0	300	329
gacagcta	gacagcta	3814	0	679.5	40	0.0e+00	0	300	330
ggggcggg	ggggcggg	19511	1309	674.1	40	0.0e+00	0	300	331
tttatttt	tttatttt	13034	940	672.6	40	0.0e+00	0	300	332
gacttttg	gacttttg	2985	0	671.7	40	0.0e+00	0	300	333
atgctatc	atgctatc	2025	0	669.4	39	0.0e+00	0	300	334
ctgtactg	ctgtactg	3503	9	668.3	40	0.0e+00	0	300	335
tagctgac	tagctgac	2224	0	667.8	39	0.0e+00	0	300	336
gggggggc	gggggggc	5763	0	666.9	39	0.0e+00	0	300	337
ggacagcc	ggacagcc	7872	0	666.7	40	0.0e+00	0	300	338
ggcagagg	ggcagagg	14708	611	666.1	40	0.0e+00	0	300	339
tgcatatg	tgcatatg	3965	4	665.4	40	0.0e+00	0	300	340
gtgcatgt	gtgcatgt	4602	30	664.9	40	0.0e+00	0	300	341
acttttgg	acttttgg	3072	0	664.3	40	0.0e+00	0	300	342
tgtgtgca	tgtgtgca	8833	0	664.3	40	0.0e+00	0	300	343
tgcaaccc	tgcaaccc	3034	0	662.9	39	0.0e+00	0	300	344
gaggccag	gaggccag	11709	5	662.5	40	0.0e+00	0	300	345
actcacac	actcacac	4247	35	662.2	40	0.0e+00	0	300	346
caccccca	caccccca	14544	1116	662.1	40	0.0e+00	0	300	347
ggagggga	ggagggga	14996	1657	661.5	40	0.0e+00	0	300	348
ccacacac	ccacacac	8298	15	660.0	40	0.0e+00	0	300	349
attttttt	attttttt	12547	0	658.4	40	0.0e+00	0	300	350
ctggcctc	ctggcctc	12111	16	658.3	40	0.0e+00	0	300	351
agccaggg	agccaggg	10961	0	658.0	40	0.0e+00	0	300	352
gtgagtgt	gtgagtgt	4885	40	657.0	40	0.0e+00	0	300	353
atatgccc	atatgccc	2038	0	655.3	39	0.0e+00	0	300	354
ccacctat	ccacctat	2475	0	654.7	39	0.0e+00	0	300	355
acacacca	acacacca	5794	16	652.8	40	0.0e+00	0	300	356
gcctctgc	gcctctgc	12486	562	651.2	40	0.0e+00	0	300	357
gggcctct	gggcctct	6119	0	651.1	40	0.0e+00	0	300	358
tgcatgtg	tgcatgtg	6317	34	650.9	40	0.0e+00	0	300	359
aaaaaaag	aaaaaaag	13527	0	650.0	40	0.0e+00	0	300	360
ctgcctcc	ctgcctcc	15419	37	649.4	40	0.0e+00	0	300	361
agctagag	agctagag	5327	1	649.4	40	0.0e+00	0	300	362
aaagtccc	aaagtccc	3838	0	645.9	40	0.0e+00	0	300	363
gtgtgcat	gtgtgcat	6073	0	645.2	40	0.0e+00	0	300	364
gccccccc	gccccccc	5861	0	645.1	39	0.0e+00	0	300	365
ctcacaca	ctcacaca	7484	0	645.1	40	0.0e+00	0	300	366
ccagtacc	ccagtacc	3291	0	644.8	39	0.0e+00	0	300	367
ttccaatg	ttccaatg	2772	0	644.7	39	0.0e+00	0	300	368
tgatggcc	tgatggcc	3533	0	644.6	39	0.0e+00	0	300	369
gggcgggg	gggcgggg	20880	1327	643.2	40	0.0e+00	0	300	370
gaggggag	gaggggag	13337	1798	642.4	40	0.0e+00	0	300	371
cggccatc	cggccatc	1968	0	642.2	39	0.0e+00	0	300	372
ggagtggg	ggagtggg	9925	39	639.1	40	0.0e+00	0	300	373
cctaataa	cctaataa	1621	0	638.2	39	0.0e+00	0	300	374
ccgccgcc	ccgccgcc	14695	5831	637.7	40	0.0e+00	0	300	375
cttgggta	cttgggta	3096	0	637.1	39	0.0e+00	0	300	376
acccactc	acccactc	5302	0	634.7	40	0.0e+00	0	300	377
tggcctag	tggcctag	3900	0	633.0	40	0.0e+00	0	300	378
gatggacc	gatggacc	2208	0	632.6	39	0.0e+00	0	300	379
ccctgtac	ccctgtac	3347	0	631.4	39	0.0e+00	0	300	380
gcatagtc	gcatagtc	1417	0	630.7	39	0.0e+00	0	300	381
atcccagc	atcccagc	9548	0	628.3	40	0.0e+00	0	300	382
ctatgccg	ctatgccg	787	0	627.1	39	0.0e+00	0	300	383
ggtgggtg	ggtgggtg	10094	1342	626.7	40	0.0e+00	0	300	384
gctgatta	gctgatta	1527	0	626.5	39	0.0e+00	0	300	385
caatgggc	caatgggc	2788	0	626.4	39	0.0e+00	0	300	386
cattggaa	cattggaa	2707	0	625.8	39	0.0e+00	0	300	387
gcatccac	gcatccac	3466	0	621.3	39	0.0e+00	0	300	388
tggtgtgt	tggtgtgt	5939	22	618.8	40	0.0e+00	0	300	389
gggaggca	gggaggca	10229	0	617.4	40	0.0e+00	0	300	390
atttattt	atttattt	11487	2865	617.3	40	0.0e+00	0	300	391
gtggatgc	gtggatgc	3506	0	616.5	39	0.0e+00	0	300	392
tacagggg	tacagggg	3044	0	616.5	39	0.0e+00	0	300	393
gtcagcta	gtcagcta	2193	0	615.2	39	0.0e+00	0	300	394
gagaggga	gagaggga	11767	1410	614.4	40	0.0e+00	0	300	395
ttttattt	ttttattt	11997	797	614.2	40	0.0e+00	0	300	396
tcccctac	tcccctac	3683	0	613.0	39	0.0e+00	0	300	397
tgcaatgg	tgcaatgg	2223	0	610.9	39	0.0e+00	0	300	398
aatcttgc	aatcttgc	1949	0	610.7	39	0.0e+00	0	300	399
aaataaaa	aaataaaa	11723	910	607.8	40	0.0e+00	0	300	400
gcccattg	gcccattg	2902	0	606.8	39	0.0e+00	0	300	401
agccctgg	agccctgg	11815	0	604.9	40	0.0e+00	0	300	402
ggccatca	ggccatca	3482	0	604.8	39	0.0e+00	0	300	403
tttagctc	tttagctc	3054	0	603.6	40	0.0e+00	0	300	404
gtacaggg	gtacaggg	3161	0	603.1	39	0.0e+00	0	300	405
actggggc	actggggc	4879	0	603.0	40	0.0e+00	0	300	406
ccaatgga	ccaatgga	2895	0	602.1	39	0.0e+00	0	300	407
gaacaaca	gaacaaca	3367	0	600.1	40	0.0e+00	0	300	408
tgagtgtg	tgagtgtg	6181	50	600.0	40	0.0e+00	0	300	409
cagtacag	cagtacag	3445	8	598.0	40	0.0e+00	0	300	410
ggcggcgg	ggcggcgg	14672	5612	597.2	40	0.0e+00	0	300	411
atgggcct	atgggcct	3167	0	596.5	39	0.0e+00	0	300	412
gccgccgc	gccgccgc	13716	5549	595.1	40	0.0e+00	0	300	413
agacaggg	agacaggg	9876	0	593.9	40	0.0e+00	0	300	414
catttaca	catttaca	3828	3	593.9	40	0.0e+00	0	300	415
gccccagt	gccccagt	4935	0	593.8	40	0.0e+00	0	300	416
ggtgggta	ggtgggta	4155	0	593.7	40	0.0e+00	0	300	417
aaaaaaga	aaaaaaga	10963	168	593.0	40	0.0e+00	0	300	418
cacatgca	cacatgca	6272	41	592.0	40	0.0e+00	0	300	419
gcaaccct	gcaaccct	2901	0	591.9	39	0.0e+00	0	300	420
acacatgc	acacatgc	5527	0	589.9	40	0.0e+00	0	300	421
ggaacaac	ggaacaac	2533	0	589.6	39	0.0e+00	0	300	422
cccattgg	cccattgg	3200	0	588.9	39	0.0e+00	0	300	423
ggcctagc	ggcctagc	2547	0	588.4	39	0.0e+00	0	300	424
gagacagc	gagacagc	5140	0	588.2	40	0.0e+00	0	300	425
aggggagg	aggggagg	14209	1671	586.5	40	0.0e+00	0	300	426
ttttaatt	ttttaatt	6326	52	584.4	40	0.0e+00	0	300	427
cactcaca	cactcaca	6334	46	583.9	40	0.0e+00	0	300	428
ggtattta	ggtattta	1977	0	583.4	39	0.0e+00	0	300	429
aaaaaaat	aaaaaaat	12389	0	583.1	40	0.0e+00	0	300	430
gcgggggg	gcgggggg	6255	85	581.1	40	0.0e+00	0	300	431
tgtgcatg	tgtgcatg	6571	30	580.9	40	0.0e+00	0	300	432
tggcgttc	tggcgttc	1434	0	580.9	39	0.0e+00	0	300	433
taaataaa	taaataaa	10468	2693	580.5	40	0.0e+00	0	300	434
atttttta	atttttta	5019	19	580.2	40	0.0e+00	0	300	435
cccgcccc	cccgcccc	19768	1296	579.4	40	0.0e+00	0	300	436
aagtggat	aagtggat	3714	0	578.7	40	0.0e+00	0	300	437
ggttgcag	ggttgcag	3451	2	578.7	39	0.0e+00	0	300	438
tgctggga	tgctggga	13379	0	577.1	40	0.0e+00	0	300	439
ctctagct	ctctagct	5313	4	576.2	40	0.0e+00	0	300	440
tctttttt	tctttttt	10895	148	576.0	40	0.0e+00	0	300	441
ttggccct	ttggccct	4013	0	573.6	40	0.0e+00	0	300	442
gtttgcta	gtttgcta	2038	0	573.2	39	0.0e+00	0	300	443
ccagggcc	ccagggcc	10289	43	570.0	40	0.0e+00	0	300	444
ttattttt	ttattttt	10047	251	569.7	40	0.0e+00	0	300	445
ccccgccc	ccccgccc	20906	1306	569.7	40	0.0e+00	0	300	446
cctgtact	cctgtact	3326	0	569.4	40	0.0e+00	0	300	447
agtacagg	agtacagg	3203	0	569.2	39	0.0e+00	0	300	448
tggatccc	tggatccc	3900	0	568.8	40	0.0e+00	0	300	449
cagaggca	cagaggca	12520	625	568.1	40	0.0e+00	0	300	450
gtatgcaa	gtatgcaa	1646	0	568.0	39	0.0e+00	0	300	451
gagggaga	gagggaga	12619	1411	567.4	40	0.0e+00	0	300	452
ggccctgg	ggccctgg	10041	26	567.1	40	0.0e+00	0	300	453
cagccagg	cagccagg	12226	0	565.6	40	0.0e+00	0	300	454
tccaccta	tccaccta	2715	0	565.6	39	0.0e+00	0	300	455
cacccacc	cacccacc	9757	1295	564.2	40	0.0e+00	0	300	456
gcatgtgt	gcatgtgt	5469	0	563.1	40	0.0e+00	0	300	457
aaagaaaa	aaagaaaa	15058	1591	563.1	40	0.0e+00	0	300	458
gaaaaaaa	gaaaaaaa	13126	0	562.8	40	0.0e+00	0	300	459
tttttaaa	tttttaaa	14671	0	562.8	40	0.0e+00	0	300	460
gacagggt	gacagggt	7444	0	562.7	40	0.0e+00	0	300	461
cctggctg	cctggctg	12352	0	562.6	40	0.0e+00	0	300	462
tttccaat	tttccaat	3208	0	560.5	40	0.0e+00	0	300	463
tgtgtgag	tgtgtgag	6937	0	560.4	40	0.0e+00	0	300	464
ctggcgtt	ctggcgtt	1552	0	560.2	39	0.0e+00	0	300	465
gctgggat	gctgggat	9396	0	560.1	40	0.0e+00	0	300	466
ctccctct	ctccctct	13603	1562	560.0	40	0.0e+00	0	300	467
atttccaa	atttccaa	3653	0	560.0	40	0.0e+00	0	300	468
aaggaagg	aaggaagg	11960	3578	559.8	40	0.0e+00	0	300	469
agtgggtg	agtgggtg	6531	0	559.6	40	0.0e+00	0	300	470
tttgatac	tttgatac	1780	0	559.4	39	0.0e+00	0	300	471
gtgagcat	gtgagcat	3373	0	559.1	40	0.0e+00	0	300	472
ccccccct	ccccccct	5184	0	559.0	39	0.0e+00	0	300	473
tttaaaaa	tttaaaaa	14806	0	558.1	40	0.0e+00	0	300	474
cacacatg	cacacatg	7514	0	558.1	40	0.0e+00	0	300	475
ttgataca	ttgataca	1821	0	556.5	39	0.0e+00	0	300	476
tccccctc	tccccctc	10126	623	555.6	40	0.0e+00	0	300	477
gtggtgtg	gtggtgtg	4595	79	554.1	40	0.0e+00	0	300	478
tacccaag	tacccaag	3036	0	553.1	39	0.0e+00	0	300	479
tctccctc	tctccctc	12878	1591	552.4	40	0.0e+00	0	300	480
ttttgata	ttttgata	2482	0	552.3	40	0.0e+00	0	300	481
gtgatggc	gtgatggc	3232	0	550.6	39	0.0e+00	0	300	482
tagctgtc	tagctgtc	3854	0	550.6	40	0.0e+00	0	300	483
ccaatggg	ccaatggg	3033	0	550.4	39	0.0e+00	0	300	484
ggatagca	ggatagca	2431	0	550.1	39	0.0e+00	0	300	485
ttgggata	ttgggata	2274	0	550.0	39	0.0e+00	0	300	486
atttcaaa	atttcaaa	4457	11	549.1	40	0.0e+00	0	300	487
cactcccc	cactcccc	6234	7	548.0	40	0.0e+00	0	300	488
atgcaatg	atgcaatg	1931	1	547.7	39	0.0e+00	0	300	489
gaggcaga	gaggcaga	13885	782	547.0	40	0.0e+00	0	300	490
ggcggggg	ggcggggg	11595	317	546.2	40	0.0e+00	0	300	491
agaggccc	agaggccc	6099	0	546.1	40	0.0e+00	0	300	492
agagagag	agagagag	22142	31347	546.0	40	0.0e+00	0	300	493
tccaatgg	tccaatgg	2419	0	545.9	39	0.0e+00	0	300	494
caatatga	caatatga	1675	0	545.7	39	0.0e+00	0	300	495
gtccatcc	gtccatcc	3221	0	545.7	39	0.0e+00	0	300	496
cattggac	cattggac	1920	0	544.8	39	0.0e+00	0	300	497
agtgatgg	agtgatgg	3999	0	543.9	40	0.0e+00	0	300	498
tataggtg	tataggtg	2054	0	543.9	39	0.0e+00	0	300	499
gttccagg	gttccagg	8789	2	543.3	40	0.0e+00	0	300	500
gcggcggc	gcggcggc	13772	5435	543.0	40	0.0e+00	0	300	501
gaggggga	gaggggga	10301	669	542.8	40	0.0e+00	0	300	502
acacaaac	acacaaac	4611	19	541.6	40	0.0e+00	0	300	503
agagggag	agagggag	13515	1402	541.0	40	0.0e+00	0	300	504
gctaggcc	gctaggcc	2669	0	539.8	39	0.0e+00	0	300	505
caatggtg	caatggtg	2367	0	538.7	39	0.0e+00	0	300	506
gattatgg	gattatgg	1583	0	538.4	39	0.0e+00	0	300	507
gagggggg	gagggggg	8763	57	538.0	40	0.0e+00	0	300	508
ccagtaca	ccagtaca	2656	0	536.2	39	0.0e+00	0	300	509
ttttaaaa	ttttaaaa	14742	0	536.0	40	0.0e+00	0	300	510
tctgcctc	tctgcctc	13862	742	535.9	40	0.0e+00	0	300	511
ctaggccc	ctaggccc	3012	0	534.8	39	0.0e+00	0	300	512
attggaaa	attggaaa	3116	0	534.2	40	0.0e+00	0	300	513
gggatcca	gggatcca	3827	0	533.3	39	0.0e+00	0	300	514
tttttttc	tttttttc	13460	0	533.2	40	0.0e+00	0	300	515
gggggcgg	gggggcgg	14062	377	531.8	40	0.0e+00	0	300	516
atattgtt	atattgtt	2260	0	530.9	40	0.0e+00	0	300	517
aaaataaa	aaaataaa	12911	971	530.3	40	0.0e+00	0	300	518
attatggg	attatggg	2005	0	530.2	39	0.0e+00	0	300	519
agaccagg	agaccagg	8387	0	528.9	40	0.0e+00	0	300	520
gggacttt	gggacttt	3857	0	528.7	40	0.0e+00	0	300	521
tgtgagtg	tgtgagtg	5424	41	528.5	40	0.0e+00	0	300	522
catgtgtg	catgtgtg	7569	0	528.3	40	0.0e+00	0	300	523
agaggcag	agaggcag	15281	855	527.7	40	0.0e+00	0	300	524
gtaactcc	gtaactcc	2311	0	527.3	39	0.0e+00	0	300	525
tgtactgg	tgtactgg	2863	0	526.7	39	0.0e+00	0	300	526
cctttagc	cctttagc	2512	0	526.7	39	0.0e+00	0	300	527
aggcccat	aggcccat	3157	0	526.7	39	0.0e+00	0	300	528
tactgggg	tactgggg	3477	0	526.3	39	0.0e+00	0	300	529
acaaacac	acaaacac	4887	16	524.5	40	0.0e+00	0	300	530
gagagaga	gagagaga	21170	31667	524.3	40	0.0e+00	0	300	531
cacttatc	cacttatc	1404	0	523.3	39	0.0e+00	0	300	532
ttcaaatg	ttcaaatg	3553	0	522.7	40	0.0e+00	0	300	533
accattgc	accattgc	2016	0	522.4	39	0.0e+00	0	300	534
tccctctc	tccctctc	11629	1544	522.2	40	0.0e+00	0	300	535
gccatcac	gccatcac	3090	0	522.1	39	0.0e+00	0	300	536
tgctaggc	tgctaggc	3078	0	521.2	39	0.0e+00	0	300	537
gatatagc	gatatagc	1278	0	521.2	39	0.0e+00	0	300	538
gggagtgg	gggagtgg	8877	27	520.9	40	0.0e+00	0	300	539
tcatattg	tcatattg	1722	0	520.8	39	0.0e+00	0	300	540
tatttatt	tatttatt	9723	2591	520.8	40	0.0e+00	0	300	541
tgcaaact	tgcaaact	3168	0	519.6	40	0.0e+00	0	300	542
ccataatc	ccataatc	1415	0	519.5	39	0.0e+00	0	300	543
cctggtct	cctggtct	8601	0	519.3	40	0.0e+00	0	300	544
ttgggtac	ttgggtac	1863	0	519.2	39	0.0e+00	0	300	545
ggagaggg	ggagaggg	13963	1453	518.5	40	0.0e+00	0	300	546
aggggggg	aggggggg	4871	0	518.1	39	0.0e+00	0	300	547
cccccctc	cccccctc	9040	81	517.7	40	0.0e+00	0	300	548
ccctttag	ccctttag	2608	0	516.8	39	0.0e+00	0	300	549
gtgtgtgg	gtgtgtgg	8300	26	516.4	40	0.0e+00	0	300	550
gactgtga	gactgtga	3770	2	515.8	40	0.0e+00	0	300	551
ccccagta	ccccagta	3394	0	515.6	39	0.0e+00	0	300	552
aatggtgt	aatggtgt	2368	0	513.9	39	0.0e+00	0	300	553
ttttcttt	ttttcttt	15261	1487	513.5	40	0.0e+00	0	300	554
tatcccaa	tatcccaa	2186	0	511.7	39	0.0e+00	0	300	555
ccctctcc	ccctctcc	13874	1664	510.4	40	0.0e+00	0	300	556
gatccatc	gatccatc	2719	0	509.3	39	0.0e+00	0	300	557
cacccact	cacccact	6411	0	508.9	40	0.0e+00	0	300	558
gagctaaa	gagctaaa	3109	0	508.6	40	0.0e+00	0	300	559
gactatgc	gactatgc	1293	0	508.6	39	0.0e+00	0	300	560
ttgcatac	ttgcatac	1638	0	508.2	39	0.0e+00	0	300	561
tttcaaat	tttcaaat	4258	9	507.2	40	0.0e+00	0	300	562
gttccacc	gttccacc	2963	0	506.7	39	0.0e+00	0	300	563
cccccgcc	cccccgcc	11401	328	506.5	40	0.0e+00	0	300	564
accacaca	accacaca	5198	17	505.9	40	0.0e+00	0	300	565
tgtaaatg	tgtaaatg	3753	8	505.9	40	0.0e+00	0	300	566
tatttttt	tatttttt	7462	72	505.5	40	0.0e+00	0	300	567
attgcata	attgcata	1583	0	505.5	39	0.0e+00	0	300	568
caaacaca	caaacaca	7155	20	505.1	40	0.0e+00	0	300	569
ccccccgc	ccccccgc	6245	80	505.0	39	0.0e+00	0	300	570
aacaatat	aacaatat	2226	0	504.9	39	0.0e+00	0	300	571
tctctctc	tctctctc	22164	33363	504.5	40	0.0e+00	0	300	572
tttgctag	tttgctag	2213	0	503.7	39	0.0e+00	0	300	573
tgtatcaa	tgtatcaa	1841	0	503.7	39	0.0e+00	0	300	574
ctagtgta	ctagtgta	1438	0	502.8	39	0.0e+00	0	300	575
ccccaatg	ccccaatg	2629	0	502.6	39	0.0e+00	0	300	576
cctctccc	cctctccc	14553	1631	501.3	40	0.0e+00	0	300	577
gagacagg	gagacagg	11019	9	500.5	40	0.0e+00	0	300	578
tgtggtgt	tgtggtgt	4126	78	500.1	40	0.0e+00	0	300	579
ctctctct	ctctctct	22955	33077	499.9	40	0.0e+00	0	300	580
agatggcc	agatggcc	4057	0	499.5	40	0.0e+00	0	300	581
ccattgga	ccattgga	2383	0	498.4	39	0.0e+00	0	300	582
ctagctcc	ctagctcc	4062	0	497.3	40	0.0e+00	0	300	583
agggccaa	agggccaa	4038	0	497.1	40	0.0e+00	0	300	584
gctagtgt	gctagtgt	1923	0	496.9	39	0.0e+00	0	300	585
ggccatct	ggccatct	4210	0	496.5	40	0.0e+00	0	300	586
gtatcaaa	gtatcaaa	1714	0	496.4	39	0.0e+00	0	300	587
gtttgtgt	gtttgtgt	4718	18	495.6	40	0.0e+00	0	300	588
ccctgtct	ccctgtct	9924	0	495.4	40	0.0e+00	0	300	589
aagtcccc	aagtcccc	4019	0	495.2	40	0.0e+00	0	300	590
tccaatgc	tccaatgc	2470	0	495.0	39	0.0e+00	0	300	591
agtttgca	agtttgca	3216	0	494.7	40	0.0e+00	0	300	592
ccattgca	ccattgca	2203	0	493.9	39	0.0e+00	0	300	593
gggagagg	gggagagg	14187	1459	493.3	40	0.0e+00	0	300	594
gcattgga	gcattgga	2345	0	491.2	39	0.0e+00	0	300	595
gtgtgagt	gtgtgagt	4330	31	490.6	40	0.0e+00	0	300	596
caccattg	caccattg	2448	0	490.5	39	0.0e+00	0	300	597
accctgtc	accctgtc	7490	0	490.5	40	0.0e+00	0	300	598
ggcgttcc	ggcgttcc	1622	0	490.4	39	0.0e+00	0	300	599
ttggaaat	ttggaaat	3670	0	490.4	40	0.0e+00	0	300	600
aaataaat	aaataaat	11313	2912	489.1	40	0.0e+00	0	300	601
cctggaac	cctggaac	9013	1	489.1	40	0.0e+00	0	300	602
tctagctc	tctagctc	3489	3	488.3	40	0.0e+00	0	300	603
ggatggac	ggatggac	2958	0	488.2	39	0.0e+00	0	300	604
tcttgtga	tcttgtga	2824	0	487.8	40	0.0e+00	0	300	605
cccctacc	cccctacc	5153	38	486.7	40	0.0e+00	0	300	606
gctatatc	gctatatc	1274	0	485.9	39	0.0e+00	0	300	607
ccacttct	ccacttct	5629	0	485.5	40	0.0e+00	0	300	608
tttgaaat	tttgaaat	4277	14	485.4	40	0.0e+00	0	300	609
tccatcca	tccatcca	6525	1209	485.2	40	0.0e+00	0	300	610
ctccattg	ctccattg	3630	0	485.0	40	0.0e+00	0	300	611
actagcaa	actagcaa	1824	0	484.6	39	0.0e+00	0	300	612
tgggaggc	tgggaggc	7980	0	484.4	40	0.0e+00	0	300	613
aggcaggc	aggcaggc	10692	848	483.0	40	0.0e+00	0	300	614
agggagag	agggagag	13625	1399	482.8	40	0.0e+00	0	300	615
tagtgtat	tagtgtat	1584	0	482.4	39	0.0e+00	0	300	616
tgattatg	tgattatg	1716	0	482.3	39	0.0e+00	0	300	617
aaaaataa	aaaaataa	9927	284	482.0	40	0.0e+00	0	300	618
ttgctagt	ttgctagt	1728	0	481.9	39	0.0e+00	0	300	619
aacgccag	aacgccag	1650	0	481.4	39	0.0e+00	0	300	620
gcctagca	gcctagca	3136	0	481.1	39	0.0e+00	0	300	621
ggtggctc	ggtggctc	6412	0	480.2	40	0.0e+00	0	300	622
taatcagc	taatcagc	1435	0	479.0	39	0.0e+00	0	300	623
ttcttttt	ttcttttt	12394	533	478.9	40	0.0e+00	0	300	624
cctgtctc	cctgtctc	10829	5	478.9	40	0.0e+00	0	300	625
aggcagag	aggcagag	15928	631	478.1	40	0.0e+00	0	300	626
cgccgccg	cgccgccg	10611	4677	478.1	40	0.0e+00	0	300	627
cttgctag	cttgctag	2346	0	477.1	39	0.0e+00	0	300	628
gctgactg	gctgactg	4214	1	476.5	40	0.0e+00	0	300	629
ggagttac	ggagttac	2292	0	476.3	39	0.0e+00	0	300	630
agctgact	agctgact	3882	0	475.5	40	0.0e+00	0	300	631
actatgcc	actatgcc	1762	0	474.7	39	0.0e+00	0	300	632
ccgccccc	ccgccccc	14011	330	474.4	40	0.0e+00	0	300	633
tctcttgt	tctcttgt	3916	0	473.6	40	0.0e+00	0	300	634
tatcaaaa	tatcaaaa	2399	0	473.5	39	0.0e+00	0	300	635
ctgcctct	ctgcctct	15233	824	473.3	40	0.0e+00	0	300	636
gtactggg	gtactggg	3517	0	473.3	39	0.0e+00	0	300	637
ataggtgg	ataggtgg	2428	0	473.1	39	0.0e+00	0	300	638
aaaagaaa	aaaagaaa	14733	1607	472.4	40	0.0e+00	0	300	639
gggcctag	gggcctag	2901	0	472.3	39	0.0e+00	0	300	640
tagcaaac	tagcaaac	2085	0	471.8	39	0.0e+00	0	300	641
catattgt	catattgt	2070	0	471.6	39	0.0e+00	0	300	642
cggggtac	cggggtac	1057	0	471.5	39	0.0e+00	0	300	643
ggatgctc	ggatgctc	3885	0	470.5	40	0.0e+00	0	300	644
cacaaaca	cacaaaca	5470	16	469.9	40	0.0e+00	0	300	645
gaaggaag	gaaggaag	12818	3571	469.7	40	0.0e+00	0	300	646
tgtgtggt	tgtgtggt	5188	23	469.6	40	0.0e+00	0	300	647
ctacacac	ctacacac	3141	0	469.2	39	0.0e+00	0	300	648
gtgtgtag	gtgtgtag	3080	4	469.0	39	0.0e+00	0	300	649
ttgttcca	ttgttcca	3137	0	468.9	40	0.0e+00	0	300	650
taaatacc	taaatacc	1843	0	468.9	39	0.0e+00	0	300	651
catccact	catccact	3641	0	468.9	40	0.0e+00	0	300	652
taggcccc	taggcccc	2300	0	468.5	39	0.0e+00	0	300	653
ttagctcc	ttagctcc	2763	0	468.1	39	0.0e+00	0	300	654
acaatatg	acaatatg	1922	0	467.9	39	0.0e+00	0	300	655
atatgaac	atatgaac	1863	0	467.4	39	0.0e+00	0	300	656
tggctgtc	tggctgtc	7909	0	467.3	40	0.0e+00	0	300	657
aattaaaa	aattaaaa	6268	53	467.1	40	0.0e+00	0	300	658
tttctttt	tttctttt	14512	1581	467.0	40	0.0e+00	0	300	659
ctgattat	ctgattat	1688	0	466.9	39	0.0e+00	0	300	660
tcacaaga	tcacaaga	2876	0	465.8	39	0.0e+00	0	300	661
gaacgcca	gaacgcca	1496	0	465.7	39	0.0e+00	0	300	662
gctaaagg	gctaaagg	2523	0	465.1	39	0.0e+00	0	300	663
ccctaccc	ccctaccc	6147	86	464.5	40	0.0e+00	0	300	664
tgctatcc	tgctatcc	2281	0	463.8	39	0.0e+00	0	300	665
cagtgatg	cagtgatg	4057	0	463.2	40	0.0e+00	0	300	666
atgctcac	atgctcac	3324	0	462.8	40	0.0e+00	0	300	667
ggctaata	ggctaata	1359	0	462.6	39	0.0e+00	0	300	668
atggtgtc	atggtgtc	3219	0	462.4	40	0.0e+00	0	300	669
agcctggt	agcctggt	8500	0	462.3	40	0.0e+00	0	300	670
gatgctca	gatgctca	3664	0	462.3	40	0.0e+00	0	300	671
cggcggcg	cggcggcg	10483	4426	461.4	40	0.0e+00	0	300	672
ttttggcc	ttttggcc	2450	0	460.9	39	0.0e+00	0	300	673
tgcctccc	tgcctccc	10058	0	459.8	40	0.0e+00	0	300	674
ggaaggaa	ggaaggaa	12508	3557	459.7	40	0.0e+00	0	300	675
gtagacca	gtagacca	5371	0	459.1	40	0.0e+00	0	300	676
ctaaaggg	ctaaaggg	2586	0	457.0	39	0.0e+00	0	300	677
cattgggg	cattgggg	2587	0	456.8	39	0.0e+00	0	300	678
ttctctag	ttctctag	4059	0	456.1	40	0.0e+00	0	300	679
aaatcttg	aaatcttg	2504	0	456.0	39	0.0e+00	0	300	680
gggatagc	gggatagc	2367	0	455.9	39	0.0e+00	0	300	681
cacgggac	cacgggac	2015	1	455.5	39	0.0e+00	0	300	682
ttatttat	ttatttat	9177	2528	455.4	40	0.0e+00	0	300	683
tttggccc	tttggccc	2867	0	455.1	39	0.0e+00	0	300	684
ttacacac	ttacacac	2564	0	454.8	39	0.0e+00	0	300	685
ctctgcct	ctctgcct	16079	603	454.7	40	0.0e+00	0	300	686
tgatccat	tgatccat	1997	0	454.1	39	0.0e+00	0	300	687
acacacga	acacacga	1320	0	453.7	39	0.0e+00	0	300	688
acgcacgc	acgcacgc	1798	447	453.6	39	0.0e+00	0	300	689
cccagtac	cccagtac	3390	0	453.5	39	0.0e+00	0	300	690
tttttaat	tttttaat	7089	27	452.6	40	0.0e+00	0	300	691
ctagcaaa	ctagcaaa	2364	0	452.5	39	0.0e+00	0	300	692
gatatttt	gatatttt	3059	0	451.8	40	0.0e+00	0	300	693
tagaccag	tagaccag	6054	0	451.6	40	0.0e+00	0	300	694
acatttca	acatttca	3662	0	451.6	40	0.0e+00	0	300	695
cccataat	cccataat	1908	0	451.5	39	0.0e+00	0	300	696
gtgtcagc	gtgtcagc	2923	0	450.0	39	0.0e+00	0	300	697
ttgctagg	ttgctagg	2759	0	449.6	39	0.0e+00	0	300	698
gtagggga	gtagggga	3445	0	449.6	39	0.0e+00	0	300	699
tttttggc	tttttggc	2554	0	449.3	39	0.0e+00	0	300	700
cccggcat	cccggcat	1552	0	449.2	39	0.0e+00	0	300	701
cccccata	cccccata	2795	0	449.2	39	0.0e+00	0	300	702
gcaagatt	gcaagatt	1815	0	449.1	39	0.0e+00	0	300	703
cttttgat	cttttgat	2828	0	448.9	40	0.0e+00	0	300	704
ggcctctc	ggcctctc	6483	0	448.7	40	0.0e+00	0	300	705
gggccccc	gggccccc	4152	0	447.7	39	0.0e+00	0	300	706
ctattgga	ctattgga	1516	0	446.3	39	0.0e+00	0	300	707
gctgtctc	gctgtctc	4967	0	446.1	40	0.0e+00	0	300	708
tgtgtttg	tgtgtttg	7263	28	445.3	40	0.0e+00	0	300	709
ctgcaacc	ctgcaacc	3365	2	444.7	39	0.0e+00	0	300	710
taaaaaat	taaaaaat	4790	20	444.1	40	0.0e+00	0	300	711
gcacgcac	gcacgcac	2825	467	443.9	39	0.0e+00	0	300	712
tggtgtca	tggtgtca	3298	0	443.8	40	0.0e+00	0	300	713
ctttagct	ctttagct	3024	1	443.8	40	0.0e+00	0	300	714
cgcacgca	cgcacgca	2055	434	442.3	39	0.0e+00	0	300	715
gagctaga	gagctaga	3380	2	442.2	39	0.0e+00	0	300	716
agacagct	agacagct	6103	0	442.1	40	0.0e+00	0	300	717
cataatca	cataatca	1600	0	441.6	39	0.0e+00	0	300	718
cgtttgga	cgtttgga	1126	0	441.3	39	0.0e+00	0	300	719
gttcatat	gttcatat	1939	0	441.2	39	0.0e+00	0	300	720
catttgaa	catttgaa	3372	0	440.8	40	0.0e+00	0	300	721
ccagcact	ccagcact	9437	0	440.7	40	0.0e+00	0	300	722
ccggggta	ccggggta	1180	0	440.6	39	0.0e+00	0	300	723
tgagcatc	tgagcatc	3708	0	439.8	40	0.0e+00	0	300	724
gatggatc	gatggatc	2685	0	439.8	39	0.0e+00	0	300	725
catttcaa	catttcaa	3449	0	439.6	40	0.0e+00	0	300	726
attttatt	attttatt	6624	437	439.3	40	0.0e+00	0	300	727
gtacccaa	gtacccaa	1780	0	438.5	39	0.0e+00	0	300	728
agctcctt	agctcctt	5542	0	438.4	40	0.0e+00	0	300	729
ccatcact	ccatcact	3896	0	438.2	40	0.0e+00	0	300	730
atagctga	atagctga	2476	0	437.4	39	0.0e+00	0	300	731
acaccaca	acaccaca	4179	72	437.0	40	0.0e+00	0	300	732
ctgtgagc	ctgtgagc	6033	4	435.7	40	0.0e+00	0	300	733
gagcatcc	gagcatcc	3792	0	435.4	39	0.0e+00	0	300	734
cctagcaa	cctagcaa	2663	0	435.0	39	0.0e+00	0	300	735
agaaaaaa	agaaaaaa	9530	117	434.8	40	0.0e+00	0	300	736
cacaagag	cacaagag	3532	0	434.5	39	0.0e+00	0	300	737
caacaata	caacaata	2366	0	434.2	39	0.0e+00	0	300	738
aataaata	aataaata	9689	2599	433.8	40	0.0e+00	0	300	739
tcacagtc	tcacagtc	4619	2	433.5	40	0.0e+00	0	300	740
tgtgagca	tgtgagca	4993	0	432.4	40	0.0e+00	0	300	741
ggccccgg	ggccccgg	6283	88	432.3	40	0.0e+00	0	300	742
ctgtcctg	ctgtcctg	10289	56	432.2	40	0.0e+00	0	300	743
agactgcc	agactgcc	3006	0	431.5	39	0.0e+00	0	300	744
atggtcca	atggtcca	2196	0	431.2	39	0.0e+00	0	300	745
aggacagc	aggacagc	8660	0	430.9	40	0.0e+00	0	300	746
ggtggaac	ggtggaac	2724	0	430.8	39	0.0e+00	0	300	747
cataatgt	cataatgt	1679	0	430.0	39	0.0e+00	0	300	748
gggctaat	gggctaat	1383	0	429.5	39	0.0e+00	0	300	749
cacgcacg	cacgcacg	1963	460	428.6	39	0.0e+00	0	300	750
ccctgggg	ccctgggg	8428	0	428.5	40	0.0e+00	0	300	751
gagaggcc	gagaggcc	6560	0	428.2	40	0.0e+00	0	300	752
cagggcta	cagggcta	6070	0	427.6	40	0.0e+00	0	300	753
ccaatgct	ccaatgct	2873	0	427.3	39	0.0e+00	0	300	754
tggtctac	tggtctac	5331	0	426.9	40	0.0e+00	0	300	755
tggccctg	tggccctg	8234	23	426.1	40	0.0e+00	0	300	756
atttgaaa	atttgaaa	4067	14	426.1	40	0.0e+00	0	300	757
ctcacaag	ctcacaag	3289	0	425.2	39	0.0e+00	0	300	758
gcgtttgg	gcgtttgg	1213	0	424.8	39	0.0e+00	0	300	759
gtcccgtg	gtcccgtg	2125	1	423.1	39	0.0e+00	0	300	760
ggagctaa	ggagctaa	2795	0	422.7	39	0.0e+00	0	300	761
ggggagtg	ggggagtg	6011	10	422.4	40	0.0e+00	0	300	762
atcttttg	atcttttg	2937	0	422.0	40	0.0e+00	0	300	763
caggacag	caggacag	10307	53	422.0	40	0.0e+00	0	300	764
attttctt	attttctt	6684	0	421.9	40	0.0e+00	0	300	765
accaggct	accaggct	8362	0	421.9	40	0.0e+00	0	300	766
atacacta	atacacta	1536	0	421.7	39	0.0e+00	0	300	767
ctcttgtg	ctcttgtg	3527	0	421.7	40	0.0e+00	0	300	768
atagtctc	atagtctc	1864	0	421.6	39	0.0e+00	0	300	769
ggggccta	ggggccta	2188	0	421.6	39	0.0e+00	0	300	770
taatatcc	taatatcc	1326	0	421.0	39	0.0e+00	0	300	771
gggccaaa	gggccaaa	2733	0	420.4	39	0.0e+00	0	300	772
tacactag	tacactag	1436	0	420.3	39	0.0e+00	0	300	773
atatggca	atatggca	1609	0	420.2	39	0.0e+00	0	300	774
cttgtgag	cttgtgag	3302	0	420.1	40	0.0e+00	0	300	775
cacaccac	cacaccac	4545	70	419.6	40	0.0e+00	0	300	776
cactagca	cactagca	2064	0	419.5	39	0.0e+00	0	300	777
aggaagga	aggaagga	13735	3610	419.3	40	0.0e+00	0	300	778
gccctgtg	gccctgtg	6310	6	418.9	40	0.0e+00	0	300	779
ccacttat	ccacttat	1662	0	418.3	39	0.0e+00	0	300	780
gggtgtgt	gggtgtgt	5777	0	418.2	40	0.0e+00	0	300	781
agtggatg	agtggatg	4045	0	418.0	40	0.0e+00	0	300	782
gagccacc	gagccacc	6655	0	417.1	40	0.0e+00	0	300	783
ggggactt	ggggactt	3919	0	416.0	40	0.0e+00	0	300	784
aagaaaat	aagaaaat	6510	0	415.0	40	0.0e+00	0	300	785
caatggag	caatggag	3535	0	414.3	40	0.0e+00	0	300	786
ctggtcta	ctggtcta	6111	0	413.5	40	0.0e+00	0	300	787
agcattgg	agcattgg	2745	0	412.6	39	0.0e+00	0	300	788
tgtttgtg	tgtttgtg	5473	23	412.4	40	0.0e+00	0	300	789
ctctccct	ctctccct	13797	1554	412.1	40	0.0e+00	0	300	790
attgttgt	attgttgt	2426	0	411.7	40	0.0e+00	0	300	791
gtcagcgt	gtcagcgt	1214	0	411.0	39	0.0e+00	0	300	792
tcgtgtgt	tcgtgtgt	1328	1	410.7	39	0.0e+00	0	300	793
tcagctat	tcagctat	2417	0	409.9	39	0.0e+00	0	300	794
gtgtgttg	gtgtgttg	3669	8	409.1	40	0.0e+00	0	300	795
aaaaagaa	aaaaagaa	12498	563	409.1	40	0.0e+00	0	300	796
aaaaaata	aaaaaata	7269	70	408.9	40	0.0e+00	0	300	797
aatagctg	aatagctg	2584	0	408.3	39	0.0e+00	0	300	798
ctgagttc	ctgagttc	8767	1	408.2	40	0.0e+00	0	300	799
atgctata	atgctata	1504	0	408.1	39	0.0e+00	0	300	800
tctctagc	tctctagc	4512	0	408.0	40	0.0e+00	0	300	801
acactagc	acactagc	1902	0	407.9	39	0.0e+00	0	300	802
ggaacgcc	ggaacgcc	1590	0	407.4	39	0.0e+00	0	300	803
gggtactt	gggtactt	1854	0	407.4	39	0.0e+00	0	300	804
gagatggc	gagatggc	6115	0	407.3	40	0.0e+00	0	300	805
aaaatatc	aaaatatc	3070	0	407.1	40	0.0e+00	0	300	806
tattagcc	tattagcc	1215	0	406.7	39	0.0e+00	0	300	807
gccatctt	gccatctt	5465	0	406.6	40	0.0e+00	0	300	808
ccttgggt	ccttgggt	4382	0	405.5	40	0.0e+00	0	300	809
gcctccca	gcctccca	7735	0	404.8	40	0.0e+00	0	300	810
tattggat	tattggat	1744	0	404.7	39	0.0e+00	0	300	811
cccttgcg	cccttgcg	1550	0	404.6	39	0.0e+00	0	300	812
ggagctag	ggagctag	3860	0	404.5	40	0.0e+00	0	300	813
acaagaga	acaagaga	3884	2	404.4	40	0.0e+00	0	300	814
ctaatatc	ctaatatc	1309	1	404.3	39	0.0e+00	0	300	815
gtgagttc	gtgagttc	6846	0	404.2	40	0.0e+00	0	300	816
agctaaag	agctaaag	3061	0	404.2	40	0.0e+00	0	300	817
acccatgg	acccatgg	2964	0	403.9	39	0.0e+00	0	300	818
ggtggggt	ggtggggt	9260	785	403.0	40	0.0e+00	0	300	819
tcccctgt	tcccctgt	4830	12	402.5	40	0.0e+00	0	300	820
ggtagggg	ggtagggg	4987	69	402.3	40	0.0e+00	0	300	821
aattaggt	aattaggt	1400	0	402.0	39	0.0e+00	0	300	822
gtattttc	gtattttc	2683	0	401.5	40	0.0e+00	0	300	823
tatttaca	tatttaca	3350	0	401.0	40	0.0e+00	0	300	824
catagtct	catagtct	1993	0	400.4	39	0.0e+00	0	300	825
gccaaaaa	gccaaaaa	2502	0	400.4	39	0.0e+00	0	300	826
aatcccag	aatcccag	9404	0	400.3	40	0.0e+00	0	300	827
aaggagct	aaggagct	5395	0	400.1	40	0.0e+00	0	300	828
gccccggc	gccccggc	6444	87	400.0	40	0.0e+00	0	300	829
agtccccc	agtccccc	3589	0	399.8	39	2.2e-61	1.4e-56	55.84	830
gatatggc	gatatggc	1329	0	399.3	39	2.8e-61	1.9e-56	55.73	831
tgctagtg	tgctagtg	2070	0	397.7	39	5.7e-61	3.7e-56	55.43	832
atacatat	atacatat	4439	125	397.4	40	2.1e-60	1.4e-55	54.86	833
gtaaataa	gtaaataa	3004	0	396.9	40	2.7e-60	1.8e-55	54.75	834
tggatgct	tggatgct	4965	0	396.2	40	3.7e-60	2.4e-55	54.62	835
ggtctaca	ggtctaca	5552	0	396.1	40	3.9e-60	2.6e-55	54.59	836
tcataatg	tcataatg	1739	0	395.5	39	1.6e-60	1e-55	54.99	837
ctgggatt	ctgggatt	9161	0	395.1	40	6.1e-60	4e-55	54.40	838
agctgtct	agctgtct	5896	0	394.3	40	8.7e-60	5.7e-55	54.24	839
taatgttg	taatgttg	1705	0	394.0	39	3.1e-60	2e-55	54.69	840
tgcctctg	tgcctctg	12463	628	393.2	40	1.4e-59	9.2e-55	54.03	841
catcactg	catcactg	4003	0	392.9	40	1.6e-59	1.1e-54	53.97	842
gtgcgtgc	gtgcgtgc	2780	423	392.5	39	6.1e-60	4e-55	54.40	843
gtgtttgt	gtgtttgt	4936	30	392.3	40	2.2e-59	1.4e-54	53.85	844
tcttgcta	tcttgcta	2499	0	391.9	39	8.1e-60	5.3e-55	54.28	845
tgcgtgcg	tgcgtgcg	2061	376	391.3	39	1.1e-59	6.9e-55	54.16	846
gggggact	gggggact	3714	0	390.9	39	1.2e-59	8.2e-55	54.09	847
cacttctg	cacttctg	4990	0	390.6	40	4.6e-59	3e-54	53.52	848
gctgtcct	gctgtcct	8756	0	390.6	40	4.7e-59	3.1e-54	53.51	849
tggatgga	tggatgga	6814	1369	390.6	40	4.7e-59	3.1e-54	53.51	850
agtgtatg	agtgtatg	2501	0	389.9	39	2.0e-59	1.3e-54	53.89	851
ctacccac	ctacccac	4063	2	389.8	40	6.6e-59	4.3e-54	53.36	852
gcctgcct	gcctgcct	11196	1148	389.7	40	6.8e-59	4.5e-54	53.35	853
atatagct	atatagct	1777	0	389.0	39	3.0e-59	2e-54	53.71	854
acaccatt	acaccatt	2455	0	388.6	39	3.6e-59	2.4e-54	53.63	855
cagctatt	cagctatt	2533	0	388.4	39	4.0e-59	2.6e-54	53.58	856
gttgcaga	gttgcaga	2820	0	388.3	39	4.2e-59	2.7e-54	53.56	857
ttgaaatg	ttgaaatg	3230	0	387.9	40	1.5e-58	1e-53	53.00	858
tattttct	tattttct	5606	0	387.9	40	1.6e-58	1e-53	52.99	859
ggggctgg	ggggctgg	13936	532	387.7	40	1.7e-58	1.1e-53	52.95	860
tttgggat	tttgggat	3296	1	386.7	40	2.7e-58	1.8e-53	52.75	861
tgtagacc	tgtagacc	5630	0	386.3	40	3.3e-58	2.1e-53	52.67	862
tattgttg	tattgttg	2312	0	385.7	39	1.3e-58	8.6e-54	53.06	863
atatgtat	atatgtat	4348	115	384.8	40	6.4e-58	4.2e-53	52.38	864
gcgtgcgt	gcgtgcgt	1683	429	384.8	39	2.0e-58	1.3e-53	52.87	865
tccaggac	tccaggac	7698	0	384.6	40	6.9e-58	4.5e-53	52.35	866
ataatgtt	ataatgtt	1948	0	384.6	39	2.2e-58	1.4e-53	52.85	867
tcagcgtt	tcagcgtt	1102	0	384.5	39	2.3e-58	1.5e-53	52.82	868
tgaaatgt	tgaaatgt	3603	0	384.0	40	9.3e-58	6.1e-53	52.22	869
tataccaa	tataccaa	1309	0	383.9	39	3.1e-58	2e-53	52.70	870
gtgtttgc	gtgtttgc	3887	0	383.8	40	1.0e-57	6.6e-53	52.18	871
ttatttac	ttatttac	3079	0	383.5	40	1.2e-57	7.6e-53	52.12	872
agtctcac	agtctcac	3027	0	383.1	39	4.3e-58	2.8e-53	52.55	873
agtgctgg	agtgctgg	9442	0	382.6	40	1.7e-57	1.1e-52	51.95	874
ggatccat	ggatccat	2013	0	382.5	39	5.5e-58	3.6e-53	52.44	875
tgctcaca	tgctcaca	4915	0	382.3	40	1.9e-57	1.3e-52	51.90	876
cttatcag	cttatcag	1815	0	382.1	39	6.6e-58	4.3e-53	52.36	877
atcccaaa	atcccaaa	3125	1	381.8	40	2.4e-57	1.6e-52	51.80	878
aagagctc	aagagctc	3628	0	381.5	40	2.8e-57	1.8e-52	51.74	879
ggcagtct	ggcagtct	3111	0	381.5	39	9.0e-58	5.9e-53	52.23	880
acttatca	acttatca	1411	0	380.7	39	1.3e-57	8.4e-53	52.07	881
aagtaccc	aagtaccc	1891	0	380.5	39	1.4e-57	9.1e-53	52.04	882
taggtgga	taggtgga	2706	0	380.3	39	1.5e-57	1e-52	52.00	883
cctggcgt	cctggcgt	2007	0	380.2	39	1.6e-57	1.1e-52	51.98	884
tggtccat	tggtccat	2428	0	379.8	39	1.9e-57	1.2e-52	51.91	885
gttcataa	gttcataa	1603	0	378.8	39	3.0e-57	2e-52	51.70	886
agctatat	agctatat	1810	0	377.8	39	4.8e-57	3.1e-52	51.50	887
acacaccc	acacaccc	5938	0	377.2	40	1.9e-56	1.3e-51	50.90	888
acaacaat	acaacaat	2376	0	377.1	39	6.4e-57	4.2e-52	51.38	889
gaaaatac	gaaaatac	2600	0	377.1	39	6.4e-57	4.2e-52	51.37	890
ccatgggt	ccatgggt	3045	0	376.4	39	8.7e-57	5.7e-52	51.24	891
gggggccc	gggggccc	4191	0	376.4	39	8.9e-57	5.8e-52	51.23	892
agcatcca	agcatcca	4672	1	376.3	40	2.9e-56	1.9e-51	50.72	893
gccggggc	gccggggc	6305	92	375.4	40	4.3e-56	2.8e-51	50.55	894
cgtgcgtg	cgtgcgtg	1945	443	374.4	39	2.2e-56	1.5e-51	50.84	895
attaaaaa	attaaaaa	6875	22	374.2	40	7.4e-56	4.8e-51	50.32	896
gctcacag	gctcacag	5811	1	374.1	40	7.7e-56	5.1e-51	50.30	897
tccttggg	tccttggg	5167	0	373.9	40	8.6e-56	5.7e-51	50.25	898
tgggtact	tgggtact	2476	0	373.0	39	4.1e-56	2.7e-51	50.57	899
tggctcag	tggctcag	9608	0	372.9	40	1.4e-55	9e-51	50.05	900
gtctcttg	gtctcttg	3430	0	372.3	40	1.8e-55	1.2e-50	49.94	901
tgagccac	tgagccac	6448	0	371.7	40	2.3e-55	1.5e-50	49.83	902
gatggctc	gatggctc	5820	0	371.5	40	2.5e-55	1.7e-50	49.78	903
agttccag	agttccag	9037	3	371.2	40	2.9e-55	1.9e-50	49.72	904
aaggaccc	aaggaccc	3504	0	370.5	39	1.2e-55	8.1e-51	50.09	905
tgactgtg	tgactgtg	5066	12	370.2	40	4.5e-55	3e-50	49.53	906
taactcct	taactcct	2608	1	370.0	39	1.6e-55	1e-50	49.98	907
gtgtatgc	gtgtatgc	2971	0	369.6	39	1.9e-55	1.3e-50	49.90	908
tttaatta	tttaatta	3538	0	369.2	40	7.2e-55	4.7e-50	49.33	909
ctagcaag	ctagcaag	2471	0	369.0	39	2.4e-55	1.6e-50	49.80	910
gacagcca	gacagcca	7854	0	369.0	40	7.8e-55	5.1e-50	49.29	911
aagatggc	aagatggc	5349	0	368.7	40	8.7e-55	5.7e-50	49.25	912
gcgggcgg	gcgggcgg	8631	780	366.4	40	2.5e-54	1.6e-49	48.79	913
tagtctca	tagtctca	2315	0	366.3	39	8.5e-55	5.6e-50	49.25	914
aggagtta	aggagtta	2588	0	364.9	39	1.6e-54	1e-49	48.99	915
gtacacac	gtacacac	3450	0	364.2	40	6.6e-54	4.3e-49	48.36	916
ataatcag	ataatcag	1634	0	363.9	39	2.5e-54	1.7e-49	48.78	917
gacaccat	gacaccat	2910	0	363.8	39	2.6e-54	1.7e-49	48.77	918
tgtcctgg	tgtcctgg	9192	0	362.7	40	1.3e-53	8.5e-49	48.07	919
aatatgaa	aatatgaa	2768	4	361.9	40	1.9e-53	1.2e-48	47.91	920
atcccata	atcccata	1812	0	361.6	39	7.0e-54	4.6e-49	48.34	921
ccaggaca	ccaggaca	9056	0	361.0	40	2.8e-53	1.8e-48	47.74	922
ctggctgt	ctggctgt	9341	0	360.8	40	3.1e-53	2e-48	47.69	923
ggaggagg	ggaggagg	21145	6488	360.4	40	3.6e-53	2.4e-48	47.63	924
gcggtaca	gcggtaca	864	0	360.2	39	1.3e-53	8.5e-49	48.07	925
ggccccca	ggccccca	4979	0	359.7	39	1.6e-53	1.1e-48	47.97	926
tgtaaata	tgtaaata	3234	0	359.6	40	5.3e-53	3.5e-48	47.46	927
ggtatttt	ggtatttt	2809	0	359.3	40	6.1e-53	4e-48	47.40	928
tgagttcc	tgagttcc	7091	0	358.8	40	7.3e-53	4.8e-48	47.32	929
ccttcctt	ccttcctt	11491	3135	358.7	40	7.7e-53	5.1e-48	47.30	930
acagggtt	acagggtt	5861	0	358.7	40	7.8e-53	5.1e-48	47.29	931
actccccc	actccccc	4033	0	358.5	39	2.8e-53	1.9e-48	47.73	932
ggtacttt	ggtacttt	1923	0	358.3	39	3.0e-53	2e-48	47.71	933
tttctcta	tttctcta	4994	0	358.3	40	9.2e-53	6.1e-48	47.22	934
gaggtaac	gaggtaac	1595	0	357.5	39	4.4e-53	2.9e-48	47.54	935
tgggggcc	tgggggcc	4977	0	357.2	39	5.0e-53	3.3e-48	47.49	936
gctattgg	gctattgg	1592	0	356.9	39	5.7e-53	3.7e-48	47.43	937
tttttctt	tttttctt	11753	423	356.4	40	2.2e-52	1.4e-47	46.85	938
atagtgtc	atagtgtc	1628	0	356.1	39	8.1e-53	5.3e-48	47.27	939
tgggatag	tgggatag	3140	0	356.0	39	8.4e-53	5.5e-48	47.26	940
tccaatag	tccaatag	1595	0	356.0	39	8.7e-53	5.7e-48	47.24	941
aaagtacc	aaagtacc	1857	0	355.9	39	9.0e-53	5.9e-48	47.23	942
gtggctca	gtggctca	6477	0	355.5	40	3.3e-52	2.2e-47	46.67	943
ggtgtcag	ggtgtcag	4146	3	355.5	40	3.3e-52	2.2e-47	46.66	944
ccgcccgc	ccgcccgc	8731	858	355.4	40	3.4e-52	2.2e-47	46.65	945
ccagcccc	ccagcccc	14212	502	355.4	40	3.4e-52	2.2e-47	46.65	946
ggccaaaa	ggccaaaa	2384	0	355.3	39	1.2e-52	7.8e-48	47.11	947
acttctgt	acttctgt	4185	0	355.1	40	4.0e-52	2.6e-47	46.59	948
gtcctttc	gtcctttc	3749	0	354.3	40	5.7e-52	3.7e-47	46.43	949
agaaaata	agaaaata	5386	1	353.0	40	1.0e-51	6.6e-47	46.18	950
gaactcac	gaactcac	6764	0	352.8	40	1.1e-51	7.3e-47	46.14	951
gctaatat	gctaatat	1319	0	352.7	39	3.7e-52	2.4e-47	46.61	952
acagggga	acagggga	5015	7	352.5	40	1.2e-51	8.1e-47	46.09	953
ctatccca	ctatccca	3070	0	352.2	39	4.8e-52	3.1e-47	46.51	954
tagccctg	tagccctg	6173	0	352.1	40	1.5e-51	9.8e-47	46.01	955
gagttcca	gagttcca	6994	0	351.9	40	1.6e-51	1.1e-46	45.98	956
cctccatt	cctccatt	4309	0	351.4	40	2.1e-51	1.4e-46	45.87	957
acacactt	acacactt	3871	0	351.1	40	2.3e-51	1.5e-46	45.82	958
tgtagccc	tgtagccc	5514	0	351.1	40	2.3e-51	1.5e-46	45.82	959
tggaccat	tggaccat	2003	0	351.0	39	8.0e-52	5.3e-47	46.28	960
caagagct	caagagct	4304	0	350.9	40	2.5e-51	1.6e-46	45.78	961
gctatccc	gctatccc	2229	0	350.8	39	8.9e-52	5.9e-47	46.23	962
gacactat	gacactat	1674	0	350.7	39	9.0e-52	5.9e-47	46.23	963
gtaccccg	gtaccccg	1122	0	350.6	39	9.4e-52	6.2e-47	46.21	964
acccaagg	acccaagg	4433	0	350.4	40	3.2e-51	2.1e-46	45.68	965
acagccag	acagccag	9353	0	350.3	40	3.4e-51	2.2e-46	45.66	966
gagtcaag	gagtcaag	2612	0	350.1	39	1.2e-51	7.8e-47	46.11	967
actcagga	actcagga	6423	1	349.4	40	5.0e-51	3.3e-46	45.48	968
gaggccca	gaggccca	5705	0	349.3	40	5.1e-51	3.4e-46	45.47	969
cgcgattg	cgcgattg	678	0	349.2	39	1.8e-51	1.2e-46	45.93	970
tattttat	tattttat	6277	411	349.1	40	5.6e-51	3.6e-46	45.44	971
tctgcaac	tctgcaac	2769	0	349.1	39	1.9e-51	1.2e-46	45.90	972
attggatg	attggatg	1873	0	348.8	39	2.2e-51	1.4e-46	45.85	973
ccatccat	ccatccat	5613	1204	348.4	40	7.7e-51	5e-46	45.30	974
gtgtgtaa	gtgtgtaa	2491	0	348.4	39	2.6e-51	1.7e-46	45.78	975
gagtacat	gagtacat	1586	0	347.9	39	3.2e-51	2.1e-46	45.68	976
aaaatctt	aaaatctt	3402	0	347.7	40	1.1e-50	7.1e-46	45.15	977
agactatg	agactatg	1895	0	347.5	39	3.9e-51	2.6e-46	45.59	978
gtcctgga	gtcctgga	7713	0	346.8	40	1.6e-50	1e-45	44.98	979
ggaactca	ggaactca	7001	0	346.3	40	1.9e-50	1.3e-45	44.89	980
caacacac	caacacac	3594	3	346.2	40	2.1e-50	1.4e-45	44.86	981
ttgcgggt	ttgcgggt	1285	0	346.0	39	7.6e-51	5e-46	45.30	982
tttgtttt	tttgtttt	17931	4085	346.0	40	2.3e-50	1.5e-45	44.82	983
agtaccca	agtaccca	2505	0	345.9	39	7.9e-51	5.2e-46	45.29	984
ataccaaa	ataccaaa	1856	0	345.4	39	9.7e-51	6.3e-46	45.20	985
cctaccca	cctaccca	4284	0	344.9	40	3.6e-50	2.4e-45	44.62	986
gcggcggg	gcggcggg	9008	43	344.5	40	4.5e-50	2.9e-45	44.53	987
gcaaacac	gcaaacac	3854	0	344.0	40	5.5e-50	3.6e-45	44.45	988
tgtcagcg	tgtcagcg	1500	0	343.9	39	1.9e-50	1.3e-45	44.90	989
tagagaaa	tagagaaa	4755	0	343.4	40	7.2e-50	4.7e-45	44.33	990
gttacctc	gttacctc	1702	0	343.1	39	2.7e-50	1.8e-45	44.75	991
gtactttc	gtactttc	1896	0	342.9	39	2.9e-50	1.9e-45	44.71	992
tccaaacg	tccaaacg	983	0	342.9	39	3.0e-50	2e-45	44.71	993
attggact	attggact	1513	0	342.9	39	3.0e-50	2e-45	44.70	994
tggaacaa	tggaacaa	3010	0	342.5	39	3.6e-50	2.3e-45	44.63	995
gtgtggtg	gtgtggtg	5569	90	342.3	40	1.2e-49	7.6e-45	44.12	996
tttgcaag	tttgcaag	2945	0	342.0	40	1.4e-49	8.9e-45	44.05	997
caagagac	caagagac	3465	2	341.8	39	4.9e-50	3.2e-45	44.49	998
taccccgg	taccccgg	1237	0	341.7	39	5.0e-50	3.3e-45	44.48	999
attagccc	attagccc	1326	0	341.7	39	5.1e-50	3.3e-45	44.48	1000
catccaat	catccaat	1834	0	341.7	39	5.2e-50	3.4e-45	44.47	1001
cattgcat	cattgcat	1951	4	341.4	39	5.8e-50	3.8e-45	44.42	1002
agtcagct	agtcagct	3795	0	341.4	40	1.8e-49	1.2e-44	43.93	1003
acctaatt	acctaatt	1313	0	341.2	39	6.5e-50	4.2e-45	44.37	1004
cttatatc	cttatatc	1145	1	341.0	39	7.0e-50	4.6e-45	44.34	1005
gtgtgtac	gtgtgtac	3550	0	340.2	40	2.9e-49	1.9e-44	43.72	1006
gcggggcg	gcggggcg	8588	640	340.2	40	3.0e-49	2e-44	43.70	1007
gctagaga	gctagaga	4447	0	340.1	40	3.1e-49	2.1e-44	43.69	1008
gctccaaa	gctccaaa	3128	0	340.1	39	1.1e-49	6.9e-45	44.16	1009
gctccttg	gctccttg	4613	0	340.1	40	3.2e-49	2.1e-44	43.68	1010
ttttgttt	ttttgttt	17228	3747	340.0	40	3.3e-49	2.1e-44	43.67	1011
ctgactgt	ctgactgt	4262	0	339.9	40	3.5e-49	2.3e-44	43.64	1012
atgtaccg	atgtaccg	693	0	339.8	39	1.2e-49	8e-45	44.10	1013
ctagagaa	ctagagaa	3948	0	339.3	40	4.5e-49	3e-44	43.53	1014
tgtatgca	tgtatgca	3499	0	338.8	40	5.5e-49	3.6e-44	43.44	1015
ataagtgg	ataagtgg	1614	0	338.7	39	2.0e-49	1.3e-44	43.89	1016
gggtcctt	gggtcctt	3599	0	338.6	40	6.0e-49	3.9e-44	43.41	1017
gtatttag	gtatttag	1480	0	338.6	39	2.1e-49	1.4e-44	43.86	1018
agaagtgg	agaagtgg	5433	0	338.0	40	7.8e-49	5.1e-44	43.29	1019
gggctaca	gggctaca	5408	0	338.0	40	8.0e-49	5.3e-44	43.28	1020
gtggggtg	gtggggtg	9188	719	337.8	40	8.7e-49	5.7e-44	43.24	1021
gtctcaca	gtctcaca	3237	0	337.8	39	3.0e-49	2e-44	43.71	1022
atgccggg	atgccggg	1519	0	337.5	39	3.3e-49	2.2e-44	43.67	1023
tgagacta	tgagacta	2216	0	337.1	39	3.9e-49	2.6e-44	43.59	1024
tcctgagt	tcctgagt	6618	1	336.7	40	1.4e-48	9.2e-44	43.04	1025
caatagct	caatagct	1852	0	336.5	39	5.2e-49	3.4e-44	43.47	1026
cagggcca	cagggcca	8307	36	336.5	40	1.6e-48	1e-43	42.99	1027
gcatacac	gcatacac	2916	0	336.3	39	5.8e-49	3.8e-44	43.42	1028
caccacac	caccacac	5709	73	336.1	40	1.8e-48	1.2e-43	42.92	1029
ggggggcg	ggggggcg	6564	60	335.9	40	2.0e-48	1.3e-43	42.87	1030
gctagagt	gctagagt	2196	0	335.7	39	7.6e-49	5e-44	43.30	1031
caggggaa	caggggaa	5768	0	335.7	40	2.3e-48	1.5e-43	42.83	1032
gagccatc	gagccatc	5763	0	335.6	40	2.3e-48	1.5e-43	42.82	1033
gccctggg	gccctggg	9500	4	335.6	40	2.3e-48	1.5e-43	42.82	1034
gccatatc	gccatatc	1244	0	335.3	39	8.7e-49	5.7e-44	43.24	1035
acatttcc	acatttcc	4096	0	335.3	40	2.6e-48	1.7e-43	42.77	1036
caaggagc	caaggagc	4387	0	335.3	40	2.7e-48	1.7e-43	42.76	1037
cgcccgcc	cgcccgcc	8047	779	335.2	40	2.7e-48	1.8e-43	42.75	1038
tggggggt	tggggggt	5705	157	335.1	40	2.9e-48	1.9e-43	42.72	1039
cgcccccc	cgcccccc	6771	63	335.0	40	3.1e-48	2e-43	42.70	1040
gaactcag	gaactcag	8503	4	334.9	40	3.2e-48	2.1e-43	42.69	1041
aatcgcgc	aatcgcgc	493	0	334.7	39	1.2e-48	7.6e-44	43.12	1042
gggcggcg	gggcggcg	8018	62	334.6	40	3.5e-48	2.3e-43	42.64	1043
ttgcaaac	ttgcaaac	2566	0	334.5	39	1.3e-48	8.4e-44	43.08	1044
ttccttcc	ttccttcc	11794	3136	334.4	40	4.0e-48	2.6e-43	42.58	1045
atccatcc	atccatcc	5531	1170	334.2	40	4.4e-48	2.9e-43	42.54	1046
cgcgcgcc	cgcgcgcc	6006	4	334.1	39	1.5e-48	9.8e-44	43.01	1047
tctcacaa	tctcacaa	2787	0	333.4	39	2.1e-48	1.4e-43	42.87	1048
ttcccctg	ttcccctg	5880	0	333.3	40	6.3e-48	4.1e-43	42.38	1049
tgcggtac	tgcggtac	798	0	332.6	39	2.9e-48	1.9e-43	42.72	1050
gtttgcaa	gtttgcaa	2621	0	332.1	39	3.6e-48	2.4e-43	42.62	1051
cctctctt	cctctctt	7414	0	331.8	40	1.2e-47	8.1e-43	42.09	1052
tgctatac	tgctatac	1336	0	331.8	39	4.3e-48	2.8e-43	42.55	1053
ggtatggg	ggtatggg	2670	5	330.9	39	6.3e-48	4.1e-43	42.38	1054
agggcccc	agggcccc	4486	0	330.9	39	6.3e-48	4.2e-43	42.38	1055
tgtctctt	tgtctctt	5310	5	330.3	40	2.4e-47	1.6e-42	41.80	1056
gtggtggc	gtggtggc	7358	0	329.9	40	2.9e-47	1.9e-42	41.72	1057
atctgggt	atctgggt	3391	0	329.3	40	3.7e-47	2.4e-42	41.62	1058
ataacatt	ataacatt	1954	0	329.3	39	1.3e-47	8.5e-43	42.07	1059
aagaaaaa	aagaaaaa	11561	483	329.2	40	3.9e-47	2.5e-42	41.60	1060
gggtaggg	gggtaggg	6218	113	329.0	40	4.4e-47	2.9e-42	41.54	1061
ccaaacgc	ccaaacgc	1228	0	328.9	39	1.5e-47	9.9e-43	42.01	1062
ccaaggag	ccaaggag	5833	0	328.5	40	5.3e-47	3.5e-42	41.46	1063
caagattt	caagattt	2541	0	328.5	39	1.8e-47	1.2e-42	41.92	1064
ttttttct	ttttttct	9809	113	328.0	40	6.6e-47	4.3e-42	41.37	1065
ctgtctct	ctgtctct	10898	544	328.0	40	6.7e-47	4.4e-42	41.36	1066
tatggggg	tatggggg	2788	0	326.4	39	4.7e-47	3.1e-42	41.51	1067
atggatca	atggatca	1945	0	326.4	39	4.7e-47	3.1e-42	41.51	1068
agttacag	agttacag	3751	3	326.1	40	1.5e-46	1e-41	41.00	1069
atcagtga	atcagtga	2317	0	325.6	39	6.6e-47	4.3e-42	41.37	1070
aatggagg	aatggagg	4387	0	325.5	40	2.0e-46	1.3e-41	40.88	1071
aataaaat	aataaaat	6546	412	325.5	40	2.0e-46	1.3e-41	40.87	1072
ggcgggcg	ggcgggcg	7784	747	325.0	40	2.5e-46	1.7e-41	40.78	1073
gggccggg	gggccggg	8243	316	324.8	40	2.8e-46	1.8e-41	40.74	1074
acgccagg	acgccagg	2126	0	324.7	39	1.0e-46	6.6e-42	41.18	1075
aaccctgt	aaccctgt	6038	0	324.0	40	3.9e-46	2.6e-41	40.59	1076
ttgggagg	ttgggagg	6844	0	323.9	40	4.0e-46	2.6e-41	40.58	1077
tccactta	tccactta	2180	0	323.4	39	1.7e-46	1.1e-41	40.94	1078
tggggtgg	tggggtgg	12153	791	322.9	40	6.3e-46	4.1e-41	40.39	1079
gataagtg	gataagtg	1432	0	322.9	39	2.2e-46	1.5e-41	40.84	1080
tcctccat	tcctccat	5367	1	322.5	40	7.6e-46	5e-41	40.30	1081
gatattag	gatattag	1179	0	322.3	39	2.8e-46	1.8e-41	40.73	1082
tgggcctc	tgggcctc	5786	0	322.1	40	8.9e-46	5.8e-41	40.23	1083
ggaaatgt	ggaaatgt	4017	0	321.9	40	1.0e-45	6.6e-41	40.18	1084
ccggggcc	ccggggcc	6189	54	321.9	40	1.0e-45	6.6e-41	40.18	1085
atgggatg	atgggatg	3406	39	321.6	40	1.1e-45	7.3e-41	40.14	1086
tcaaatgt	tcaaatgt	2688	2	321.6	40	1.1e-45	7.3e-41	40.13	1087
tctgtaac	tctgtaac	3161	0	321.5	40	1.2e-45	7.8e-41	40.11	1088
gagactat	gagactat	1771	0	321.4	39	4.2e-46	2.8e-41	40.56	1089
aaaccctg	aaaccctg	7121	0	321.0	40	1.5e-45	9.7e-41	40.01	1090
ctcccaag	ctcccaag	7144	0	320.7	40	1.7e-45	1.1e-40	39.96	1091
aaacaaaa	aaacaaaa	16943	3698	320.7	40	1.7e-45	1.1e-40	39.95	1092
tggaactc	tggaactc	6986	0	320.5	40	1.8e-45	1.2e-40	39.93	1093
gccgcggc	gccgcggc	6881	16	320.2	40	2.1e-45	1.4e-40	39.86	1094
acatttga	acatttga	2615	4	319.7	40	2.6e-45	1.7e-40	39.77	1095
atggatcc	atggatcc	1995	0	319.6	39	9.3e-46	6.1e-41	40.21	1096
cccccact	cccccact	6632	0	319.5	40	2.8e-45	1.8e-40	39.74	1097
ttcataat	ttcataat	2129	0	318.9	39	1.3e-45	8.4e-41	40.08	1098
cccctggg	cccctggg	6368	0	318.3	40	5.0e-45	3.2e-40	39.49	1099
aaaacaaa	aaaacaaa	17766	4009	317.8	40	6.1e-45	4e-40	39.40	1100
atggtggc	atggtggc	5366	0	317.7	40	6.4e-45	4.2e-40	39.38	1101
ggctagcc	ggctagcc	3719	0	317.6	39	2.3e-45	1.5e-40	39.83	1102
ccccggca	ccccggca	2517	0	317.5	39	2.4e-45	1.5e-40	39.81	1103
gcgttccc	gcgttccc	2016	0	317.4	39	2.5e-45	1.6e-40	39.79	1104
taccaaaa	taccaaaa	1981	0	317.1	39	2.9e-45	1.9e-40	39.73	1105
gtggtggt	gtggtggt	7756	3323	316.7	40	9.7e-45	6.4e-40	39.20	1106
atcttgct	atcttgct	3006	0	316.1	40	1.3e-44	8.4e-40	39.07	1107
gtgagtac	gtgagtac	1897	0	316.0	39	4.7e-45	3.1e-40	39.51	1108
gcaaaatc	gcaaaatc	1662	0	316.0	39	4.7e-45	3.1e-40	39.51	1109
taattagg	taattagg	1433	0	315.8	39	5.0e-45	3.3e-40	39.48	1110
agggctac	agggctac	3881	0	315.7	40	1.5e-44	9.9e-40	39.00	1111
cggggcgg	cggggcgg	8181	591	315.7	40	1.5e-44	1e-39	38.99	1112
ccccaggg	ccccaggg	8780	0	315.6	40	1.6e-44	1e-39	38.98	1113
cggtacat	cggtacat	708	0	314.8	39	7.9e-45	5.2e-40	39.29	1114
gttcccct	gttcccct	3606	0	314.7	39	8.3e-45	5.5e-40	39.26	1115
gtatgggg	gtatgggg	2507	0	314.4	39	9.2e-45	6.1e-40	39.22	1116
ctcacagt	ctcacagt	5548	0	314.3	40	2.8e-44	1.8e-39	38.74	1117
actgtgag	actgtgag	4517	0	314.3	40	2.9e-44	1.9e-39	38.73	1118
ggtccttt	ggtccttt	3198	0	314.1	40	3.1e-44	2e-39	38.69	1119
gtgggtag	gtgggtag	3904	0	313.3	40	4.4e-44	2.9e-39	38.54	1120
cctcccaa	cctcccaa	6812	0	313.3	40	4.4e-44	2.9e-39	38.54	1121
cgccgccc	cgccgccc	7867	38	313.2	40	4.5e-44	2.9e-39	38.53	1122
caaaagat	caaaagat	2730	0	313.1	39	1.7e-44	1.1e-39	38.97	1123
gaaagtac	gaaagtac	1802	0	313.0	39	1.7e-44	1.1e-39	38.94	1124
atccaata	atccaata	1705	0	312.9	39	1.8e-44	1.2e-39	38.92	1125
ctttttgg	ctttttgg	3148	0	312.8	40	5.5e-44	3.6e-39	38.45	1126
cagtcagc	cagtcagc	4394	0	312.8	40	5.5e-44	3.6e-39	38.44	1127
atcactgg	atcactgg	2723	0	312.7	39	2.0e-44	1.3e-39	38.88	1128
tccactca	tccactca	3372	0	312.6	40	6.0e-44	3.9e-39	38.41	1129
tatgggat	tatgggat	1941	0	312.6	39	2.1e-44	1.4e-39	38.86	1130
cttccttc	cttccttc	12439	3144	312.1	40	7.4e-44	4.8e-39	38.32	1131
tgttccac	tgttccac	3508	0	311.9	40	8.2e-44	5.4e-39	38.27	1132
gagctctt	gagctctt	3537	0	311.6	40	9.4e-44	6.2e-39	38.21	1133
ggatatta	ggatatta	1297	0	311.5	39	3.3e-44	2.2e-39	38.66	1134
cagggttt	cagggttt	7076	0	311.5	40	9.8e-44	6.4e-39	38.19	1135
cgcacacg	cgcacacg	1617	143	311.2	39	3.8e-44	2.5e-39	38.60	1136
gccccgcc	gccccgcc	13782	750	310.6	40	1.4e-43	9.5e-39	38.02	1137
ataaataa	ataaataa	9137	2499	310.5	40	1.5e-43	9.9e-39	38.00	1138
tcttttga	tcttttga	3694	0	310.3	40	1.6e-43	1.1e-38	37.97	1139
ggcggggc	ggcggggc	13662	766	310.3	40	1.7e-43	1.1e-38	37.96	1140
tagagtca	tagagtca	2463	0	310.2	39	6.0e-44	4e-39	38.40	1141
attggggg	attggggg	2879	0	309.9	39	7.0e-44	4.6e-39	38.34	1142
agggtttc	agggtttc	6445	0	309.3	40	2.6e-43	1.7e-38	37.77	1143
taaatgaa	taaatgaa	3590	0	309.2	40	2.7e-43	1.8e-38	37.75	1144
aatgttat	aatgttat	1918	0	309.1	39	9.8e-44	6.4e-39	38.19	1145
gagttaca	gagttaca	2951	0	309.0	40	2.9e-43	1.9e-38	37.72	1146
cttgcaaa	cttgcaaa	3074	0	308.9	40	3.0e-43	2e-38	37.71	1147
cccaagtg	cccaagtg	5592	0	308.7	40	3.3e-43	2.2e-38	37.67	1148
tggatcac	tggatcac	2228	0	308.4	39	1.3e-43	8.8e-39	38.06	1149
atggacca	atggacca	2337	0	308.3	39	1.4e-43	9.2e-39	38.03	1150
atcacaca	atcacaca	3190	1	308.3	40	4.0e-43	2.6e-38	37.58	1151
tttggagc	tttggagc	2911	0	307.8	39	1.7e-43	1.1e-38	37.94	1152
ctcattta	ctcattta	2848	0	307.6	40	5.3e-43	3.5e-38	37.46	1153
gttacaga	gttacaga	3203	0	307.5	40	5.7e-43	3.7e-38	37.43	1154
tggcagtc	tggcagtc	2730	0	307.4	39	2.0e-43	1.3e-38	37.87	1155
tgtaactc	tgtaactc	3097	0	307.4	40	5.8e-43	3.8e-38	37.42	1156
cacagggc	cacagggc	6131	12	307.4	40	6.0e-43	3.9e-38	37.41	1157
caaacgct	caaacgct	1266	0	307.1	39	2.4e-43	1.6e-38	37.81	1158
acagaagt	acagaagt	3996	0	306.8	40	7.5e-43	4.9e-38	37.31	1159
gttcgagg	gttcgagg	2778	0	306.7	39	2.8e-43	1.8e-38	37.74	1160
agtacata	agtacata	1556	0	306.7	39	2.9e-43	1.9e-38	37.73	1161
ctttattt	ctttattt	5087	0	306.6	40	8.3e-43	5.5e-38	37.26	1162
atatccac	atatccac	1930	0	306.5	39	3.1e-43	2e-38	37.69	1163
ccatccaa	ccatccaa	2697	0	306.0	39	3.9e-43	2.6e-38	37.59	1164
gcggccgc	gcggccgc	7873	23	305.9	40	1.1e-42	7.4e-38	37.13	1165
cccgccgc	cccgccgc	9013	31	305.6	40	1.3e-42	8.4e-38	37.08	1166
agtgagta	agtgagta	2100	0	305.6	39	4.5e-43	3e-38	37.53	1167
ttttggga	ttttggga	3107	0	305.4	40	1.4e-42	9.3e-38	37.03	1168
attagata	attagata	1450	5	305.3	39	5.3e-43	3.5e-38	37.46	1169
agagacag	agagacag	11226	569	305.2	40	1.5e-42	1e-37	36.99	1170
agcgtttg	agcgtttg	1276	0	305.2	39	5.5e-43	3.6e-38	37.44	1171
tgataagt	tgataagt	1388	0	305.0	39	6.1e-43	4e-38	37.40	1172
ccgcggcc	ccgcggcc	6610	28	304.8	40	1.8e-42	1.2e-37	36.92	1173
tcccccat	tcccccat	4783	20	304.7	40	1.9e-42	1.2e-37	36.90	1174
gattttgc	gattttgc	1649	0	304.7	39	6.9e-43	4.5e-38	37.34	1175
cagggccc	cagggccc	6879	0	304.3	40	2.3e-42	1.5e-37	36.83	1176
cgcaaggg	cgcaaggg	1504	0	304.3	39	8.1e-43	5.3e-38	37.27	1177
cgattgga	cgattgga	846	0	304.3	39	8.2e-43	5.4e-38	37.27	1178
tttaattt	tttaattt	5449	121	304.1	40	2.4e-42	1.6e-37	36.80	1179
tatcagtg	tatcagtg	1924	0	304.1	39	8.7e-43	5.7e-38	37.24	1180
ggggcggc	ggggcggc	6696	0	304.0	40	2.6e-42	1.7e-37	36.76	1181
gaaaccct	gaaaccct	6467	0	303.8	40	2.8e-42	1.8e-37	36.74	1182
taaaaata	taaaaata	6607	78	303.4	40	3.4e-42	2.2e-37	36.65	1183
ttgggggg	ttgggggg	6024	0	303.1	40	3.9e-42	2.6e-37	36.59	1184
cagcgttt	cagcgttt	1353	0	303.0	39	1.4e-42	9.2e-38	37.04	1185
tgacacca	tgacacca	3053	0	302.7	39	1.6e-42	1.1e-37	36.97	1186
aatttttt	aatttttt	5232	0	302.4	40	5.1e-42	3.4e-37	36.47	1187
ccagtgat	ccagtgat	2778	0	301.8	39	2.4e-42	1.6e-37	36.80	1188
cactcacc	cactcacc	5480	0	301.8	40	6.8e-42	4.5e-37	36.35	1189
ttatttta	ttatttta	6751	423	301.5	40	7.7e-42	5e-37	36.30	1190
ctccttgg	ctccttgg	6021	0	301.4	40	8.2e-42	5.4e-37	36.27	1191
tccacttc	tccacttc	4396	8	301.1	40	9.1e-42	6e-37	36.22	1192
aagtgtgg	aagtgtgg	3650	0	301.0	40	9.7e-42	6.3e-37	36.20	1193
aactcctt	aactcctt	3028	0	300.8	40	1.0e-41	6.9e-37	36.16	1194
ccacactt	ccacactt	3661	0	300.7	40	1.1e-41	7.2e-37	36.15	1195
acccgcaa	acccgcaa	1146	0	300.6	39	4.0e-42	2.6e-37	36.58	1196
tactttct	tactttct	3638	0	300.4	40	1.3e-41	8.3e-37	36.08	1197
cccagggc	cccagggc	9619	5	300.0	40	1.5e-41	9.6e-37	36.02	1198
caatcgcg	caatcgcg	643	0	299.7	39	6.1e-42	4e-37	36.40	1199
cgcggccc	cgcggccc	5172	5	299.5	39	6.7e-42	4.4e-37	36.36	1200
ggtttctc	ggtttctc	6389	0	299.4	40	1.9e-41	1.3e-36	35.90	1201
ccacatgg	ccacatgg	5288	0	299.2	40	2.1e-41	1.4e-36	35.86	1202
ctctcttt	ctctcttt	8026	0	298.9	40	2.4e-41	1.6e-36	35.80	1203
ttaattag	ttaattag	1923	0	298.8	39	9.1e-42	6e-37	36.22	1204
ccgcaagg	ccgcaagg	1692	0	298.7	39	9.4e-42	6.2e-37	36.21	1205
agctccaa	agctccaa	3728	0	298.7	40	2.7e-41	1.7e-36	35.76	1206
gacagaca	gacagaca	7844	1559	298.6	40	2.8e-41	1.8e-36	35.74	1207
cccatacc	cccatacc	2773	3	298.5	39	1.0e-41	6.8e-37	36.17	1208
gggagccc	gggagccc	6484	0	298.2	40	3.2e-41	2.1e-36	35.67	1209
ccatgtgg	ccatgtgg	5068	0	298.2	40	3.2e-41	2.1e-36	35.67	1210
cgccccgc	cgccccgc	8621	670	298.1	40	3.4e-41	2.2e-36	35.66	1211
ttcatatt	ttcatatt	2774	2	297.8	40	3.9e-41	2.5e-36	35.59	1212
agctattg	agctattg	1866	0	297.8	39	1.4e-41	9.4e-37	36.03	1213
aaatgtta	aaatgtta	2894	0	297.7	40	4.0e-41	2.6e-36	35.58	1214
atattagc	atattagc	1220	0	297.7	39	1.5e-41	9.6e-37	36.02	1215
tgtctcta	tgtctcta	3575	0	297.7	40	4.2e-41	2.7e-36	35.57	1216
ggaccatc	ggaccatc	2016	0	296.9	39	2.1e-41	1.4e-36	35.87	1217
taaatgag	taaatgag	2641	0	296.8	40	5.9e-41	3.9e-36	35.41	1218
tatggcag	tatggcag	2025	0	296.5	39	2.5e-41	1.6e-36	35.79	1219
caacatta	caacatta	1564	0	295.8	39	3.3e-41	2.2e-36	35.66	1220
ctgcggta	ctgcggta	999	0	295.8	39	3.4e-41	2.2e-36	35.65	1221
atcttggg	atcttggg	2904	0	295.4	39	3.9e-41	2.6e-36	35.59	1222
ctggaact	ctggaact	9146	5	295.4	40	1.1e-40	7.2e-36	35.14	1223
atgttatc	atgttatc	1380	0	295.4	39	4.0e-41	2.6e-36	35.59	1224
tatccact	tatccact	2042	0	295.0	39	4.7e-41	3.1e-36	35.51	1225
aaagagag	aaagagag	8010	0	295.0	40	1.3e-40	8.8e-36	35.06	1226
ggcggccg	ggcggccg	6753	3	295.0	40	1.4e-40	8.9e-36	35.05	1227
atgtagca	atgtagca	2161	0	294.9	39	5.0e-41	3.3e-36	35.48	1228
tacctcac	tacctcac	2133	0	294.7	39	5.4e-41	3.5e-36	35.45	1229
ctgtaact	ctgtaact	3578	0	294.6	40	1.6e-40	1e-35	34.99	1230
tccccctt	tccccctt	5614	24	294.5	40	1.6e-40	1.1e-35	34.97	1231
agacagac	agacagac	7148	1494	294.4	40	1.7e-40	1.1e-35	34.95	1232
gcgccgcc	gcgccgcc	6870	0	294.3	40	1.8e-40	1.2e-35	34.93	1233
ccgccccg	ccgccccg	8298	648	294.0	40	2.0e-40	1.3e-35	34.87	1234
ccccatac	ccccatac	2567	1	293.9	39	7.6e-41	5e-36	35.30	1235
gccaccat	gccaccat	5380	0	293.9	40	2.2e-40	1.4e-35	34.84	1236
ggatggat	ggatggat	5847	1343	293.7	40	2.4e-40	1.5e-35	34.81	1237
aaaaaaac	aaaaaaac	8507	0	293.6	40	2.5e-40	1.6e-35	34.79	1238
tcgaggcc	tcgaggcc	3104	0	293.0	39	1.2e-40	7.6e-36	35.12	1239
gagaaacc	gagaaacc	6371	0	292.8	40	3.4e-40	2.3e-35	34.65	1240
ctgacacc	ctgacacc	4224	2	292.8	40	3.5e-40	2.3e-35	34.64	1241
ggctacac	ggctacac	3982	0	292.5	40	4.0e-40	2.6e-35	34.58	1242
gtgatcca	gtgatcca	2251	0	292.5	39	1.5e-40	9.5e-36	35.02	1243
ccgcgcgc	ccgcgcgc	6312	3	292.4	40	4.0e-40	2.6e-35	34.58	1244
gatacaat	gatacaat	1276	0	292.1	39	1.7e-40	1.1e-35	34.95	1245
atttaaaa	atttaaaa	6830	7	292.0	40	4.9e-40	3.2e-35	34.50	1246
gggggaga	gggggaga	7070	0	291.6	40	5.7e-40	3.8e-35	34.42	1247
taattaaa	taattaaa	3565	0	291.6	40	5.8e-40	3.8e-35	34.42	1248
gctatacc	gctatacc	1257	0	291.2	39	2.6e-40	1.7e-35	34.77	1249
atctgcaa	atctgcaa	2634	0	290.5	39	3.4e-40	2.2e-35	34.66	1250
ttagatat	ttagatat	1584	4	290.1	39	4.1e-40	2.7e-35	34.57	1251
gggggagt	gggggagt	4047	0	290.1	39	4.1e-40	2.7e-35	34.57	1252
ccacccca	ccacccca	12364	804	290.1	40	1.1e-39	7.4e-35	34.13	1253
ggatccct	ggatccct	3193	0	290.0	39	4.2e-40	2.7e-35	34.56	1254
cagaagtg	cagaagtg	4744	0	289.8	40	1.3e-39	8.4e-35	34.08	1255
ctccccta	ctccccta	3724	0	289.1	39	6.4e-40	4.2e-35	34.38	1256
aaaatacc	aaaatacc	2940	0	289.0	40	1.8e-39	1.2e-34	33.92	1257
gctcgagt	gctcgagt	1278	0	288.7	39	7.4e-40	4.8e-35	34.32	1258
aaaggacc	aaaggacc	3097	0	288.2	39	9.2e-40	6.1e-35	34.22	1259
gatggtcc	gatggtcc	2097	0	288.0	39	1.0e-39	6.8e-35	34.17	1260
acacacgt	acacacgt	1952	0	287.7	39	1.2e-39	7.7e-35	34.12	1261
agggggga	agggggga	5229	52	287.5	40	3.5e-39	2.3e-34	33.63	1262
ccctggcg	ccctggcg	3201	0	287.1	39	1.5e-39	9.9e-35	34.00	1263
ctagagtc	ctagagtc	2470	0	287.1	39	1.5e-39	1e-34	34.00	1264
gcagtctc	gcagtctc	4023	0	287.0	40	4.4e-39	2.9e-34	33.54	1265
ctgagcca	ctgagcca	9587	0	286.0	40	6.8e-39	4.4e-34	33.35	1266
aacgctga	aacgctga	1148	0	285.7	39	2.7e-39	1.8e-34	33.74	1267
cagctata	cagctata	1914	0	285.6	39	2.9e-39	1.9e-34	33.73	1268
atattttc	atattttc	3490	0	285.6	40	7.8e-39	5.1e-34	33.29	1269
cttgggag	cttgggag	6930	0	285.0	40	1.0e-38	6.7e-34	33.17	1270
cccagggg	cccagggg	6519	0	284.8	40	1.1e-38	7.3e-34	33.14	1271
ttgggtat	ttgggtat	1908	0	284.7	39	4.3e-39	2.8e-34	33.55	1272
gaaaggac	gaaaggac	3874	0	284.7	40	1.2e-38	7.7e-34	33.11	1273
gtggaaca	gtggaaca	3233	0	284.5	39	4.6e-39	3e-34	33.52	1274
atagggaa	atagggaa	2333	0	284.5	39	4.8e-39	3.1e-34	33.50	1275
ggcaggtg	ggcaggtg	7917	0	284.3	40	1.4e-38	9e-34	33.04	1276
gtacatag	gtacatag	1416	0	284.2	39	5.2e-39	3.4e-34	33.46	1277
aaggagtt	aaggagtt	3086	0	283.8	40	1.7e-38	1.1e-33	32.95	1278
ggggagag	ggggagag	10655	113	283.7	40	1.8e-38	1.2e-33	32.93	1279
gggaacgc	gggaacgc	1884	0	283.5	39	7.1e-39	4.6e-34	33.33	1280
ccctgggc	ccctgggc	8375	4	283.5	40	1.9e-38	1.3e-33	32.90	1281
catctttt	catctttt	4297	0	283.5	40	2.0e-38	1.3e-33	32.89	1282
ctatgtac	ctatgtac	1465	1	283.2	39	8.3e-39	5.4e-34	33.27	1283
ataaaaat	ataaaaat	5386	72	283.1	40	2.4e-38	1.5e-33	32.81	1284
agagtcaa	agagtcaa	2858	0	282.8	39	9.7e-39	6.4e-34	33.20	1285
atttttat	atttttat	5615	60	282.6	40	2.9e-38	1.9e-33	32.73	1286
atttttaa	atttttaa	6671	9	282.5	40	3.0e-38	2e-33	32.71	1287
cacagtca	cacagtca	6165	3	282.5	40	3.1e-38	2e-33	32.69	1288
tatagctg	tatagctg	2132	0	282.4	39	1.2e-38	7.7e-34	33.11	1289
tgtgagac	tgtgagac	3148	0	282.1	39	1.3e-38	8.6e-34	33.07	1290
agtggata	agtggata	1917	0	281.9	39	1.5e-38	9.6e-34	33.02	1291
aggggaac	aggggaac	3705	0	281.8	39	1.5e-38	9.8e-34	33.01	1292
agtggggg	agtggggg	6516	0	281.7	40	4.3e-38	2.8e-33	32.55	1293
ggccgcgg	ggccgcgg	6740	34	281.7	40	4.3e-38	2.8e-33	32.55	1294
cccgcccg	cccgcccg	7031	666	281.5	40	4.7e-38	3e-33	32.52	1295
agaaaccc	agaaaccc	6972	0	280.8	40	6.2e-38	4.1e-33	32.39	1296
agtccaat	agtccaat	1645	0	280.8	39	2.3e-38	1.5e-33	32.82	1297
tgggatgg	tgggatgg	5781	55	280.8	40	6.4e-38	4.2e-33	32.38	1298
atcaaaag	atcaaaag	2746	0	280.6	40	6.9e-38	4.5e-33	32.35	1299
attgtatc	attgtatc	1314	0	280.6	39	2.6e-38	1.7e-33	32.77	1300
gtgtccac	gtgtccac	2971	0	280.5	39	2.6e-38	1.7e-33	32.77	1301
gtgagact	gtgagact	2901	0	280.5	39	2.7e-38	1.8e-33	32.76	1302
tggctcac	tggctcac	5522	0	280.2	40	8.3e-38	5.5e-33	32.26	1303
acccagat	acccagat	3318	0	280.1	39	3.2e-38	2.1e-33	32.68	1304
gtccacac	gtccacac	3145	0	279.8	39	3.6e-38	2.4e-33	32.63	1305
tgtgagcc	tgtgagcc	5891	0	279.7	40	1.0e-37	6.6e-33	32.18	1306
gtccccca	gtccccca	4978	0	279.6	40	1.0e-37	6.9e-33	32.16	1307
atgggtgt	atgggtgt	3076	0	278.9	39	5.4e-38	3.6e-33	32.45	1308
agctcttg	agctcttg	4038	0	278.9	40	1.5e-37	9.6e-33	32.02	1309
agtgtgga	agtgtgga	3827	0	278.6	40	1.6e-37	1.1e-32	31.97	1310
ttcgaggc	ttcgaggc	2818	0	278.6	39	6.1e-38	4e-33	32.40	1311
ccaatagc	ccaatagc	1622	0	278.2	39	7.3e-38	4.8e-33	32.32	1312
tttttttg	tttttttg	8752	0	278.1	40	2.0e-37	1.3e-32	31.87	1313
catttcca	catttcca	4992	13	278.1	40	2.0e-37	1.3e-32	31.87	1314
ggcgcggg	ggcgcggg	7546	117	277.7	40	2.4e-37	1.6e-32	31.81	1315
atggcagt	atggcagt	2582	0	277.6	39	9.2e-38	6e-33	32.22	1316
tcaagagc	tcaagagc	2783	0	277.5	39	9.9e-38	6.5e-33	32.19	1317
gaagtgga	gaagtgga	4217	2	277.5	40	2.7e-37	1.8e-32	31.75	1318
cataggga	cataggga	2172	0	277.3	39	1.1e-37	7e-33	32.16	1319
gcgcgggg	gcgcgggg	6696	45	276.7	40	3.8e-37	2.5e-32	31.61	1320
tatctaat	tatctaat	1371	0	276.7	39	1.4e-37	9.2e-33	32.04	1321
tcctttca	tcctttca	4366	0	276.6	40	3.9e-37	2.5e-32	31.60	1322
cccagccc	cccagccc	16014	738	276.6	40	3.9e-37	2.5e-32	31.59	1323
gtggttgc	gtggttgc	3068	0	276.3	39	1.6e-37	1.1e-32	31.97	1324
cagtgagt	cagtgagt	4106	0	276.2	40	4.7e-37	3.1e-32	31.51	1325
tattttta	tattttta	6562	79	276.0	40	5.0e-37	3.3e-32	31.49	1326
cccccaat	cccccaat	3016	0	276.0	39	1.9e-37	1.2e-32	31.91	1327
ttttaaat	ttttaaat	7037	10	275.9	40	5.2e-37	3.4e-32	31.47	1328
ttccagga	ttccagga	8685	0	275.6	40	5.9e-37	3.9e-32	31.41	1329
gaaaatat	gaaaatat	3362	0	275.5	40	6.2e-37	4e-32	31.39	1330
ggggccct	ggggccct	4367	0	275.5	39	2.4e-37	1.6e-32	31.81	1331
aagagagg	aagagagg	7345	0	275.3	40	6.7e-37	4.4e-32	31.36	1332
catacact	catacact	2406	0	275.2	39	2.7e-37	1.8e-32	31.75	1333
agcaaaat	agcaaaat	3112	0	275.0	40	7.7e-37	5e-32	31.30	1334
tctttatt	tctttatt	4105	2	274.5	40	9.5e-37	6.2e-32	31.21	1335
cccatgga	cccatgga	3307	0	274.4	39	3.8e-37	2.5e-32	31.61	1336
gtggatat	gtggatat	1783	0	274.3	39	3.9e-37	2.6e-32	31.59	1337
ctgccata	ctgccata	1983	0	274.2	39	4.0e-37	2.6e-32	31.58	1338
gaagaggg	gaagaggg	8596	3	274.1	40	1.1e-36	7.5e-32	31.13	1339
accaccac	accaccac	7661	3387	273.9	40	1.3e-36	8.4e-32	31.08	1340
gtactcac	gtactcac	1858	0	273.7	39	5.1e-37	3.3e-32	31.48	1341
gggctggg	gggctggg	15259	883	273.7	40	1.4e-36	9.1e-32	31.04	1342
aacattat	aacattat	1807	0	273.6	39	5.2e-37	3.4e-32	31.47	1343
tagagaca	tagagaca	3652	0	273.6	40	1.4e-36	9.3e-32	31.03	1344
agagactg	agagactg	6100	0	273.6	40	1.4e-36	9.4e-32	31.03	1345
cggcgggg	cggcgggg	6143	0	273.6	40	1.4e-36	9.4e-32	31.03	1346
tgtgtgaa	tgtgtgaa	3966	0	272.7	40	2.1e-36	1.4e-31	30.86	1347
ttgcagat	ttgcagat	2800	0	272.6	39	8.2e-37	5.4e-32	31.27	1348
caccacca	caccacca	9029	3703	272.3	40	2.5e-36	1.7e-31	30.78	1349
aagatttt	aagatttt	3281	0	272.0	40	2.9e-36	1.9e-31	30.73	1350
ttaaaaat	ttaaaaat	6745	17	271.9	40	2.9e-36	1.9e-31	30.71	1351
ctaaatac	ctaaatac	1365	0	271.9	39	1.1e-36	7.3e-32	31.14	1352
actccttc	actccttc	3531	0	271.9	40	3.0e-36	2e-31	30.71	1353
ctagagac	ctagagac	3074	0	271.8	39	1.1e-36	7.5e-32	31.12	1354
gataacat	gataacat	1318	0	271.8	39	1.2e-36	7.6e-32	31.12	1355
tcccttta	tcccttta	3168	0	271.7	40	3.2e-36	2.1e-31	30.68	1356
gaaagaaa	gaaagaaa	11567	3260	271.6	40	3.3e-36	2.2e-31	30.66	1357
gtatccta	gtatccta	991	0	271.6	39	1.3e-36	8.2e-32	31.08	1358
gtgagcca	gtgagcca	5545	0	271.4	40	3.7e-36	2.4e-31	30.62	1359
gggcgcgg	gggcgcgg	7099	111	271.3	40	3.8e-36	2.5e-31	30.61	1360
tgggtagg	tgggtagg	4161	0	271.0	40	4.3e-36	2.8e-31	30.55	1361
cccgcgcc	cccgcgcc	7440	98	270.9	40	4.5e-36	2.9e-31	30.53	1362
catttttt	catttttt	5388	0	270.9	40	4.5e-36	3e-31	30.53	1363
gcgcgcgg	gcgcgcgg	6186	2	270.8	40	4.7e-36	3.1e-31	30.51	1364
gcatagtg	gcatagtg	1468	0	270.6	39	1.9e-36	1.3e-31	30.89	1365
gtagccct	gtagccct	4073	0	270.4	40	5.7e-36	3.8e-31	30.43	1366
actctagc	actctagc	2146	0	270.3	39	2.2e-36	1.5e-31	30.84	1367
tggtggtg	tggtggtg	9056	3687	270.1	40	6.5e-36	4.3e-31	30.37	1368
gtgtggac	gtgtggac	3109	0	269.8	39	2.7e-36	1.8e-31	30.75	1369
cccttccc	cccttccc	13620	839	269.8	40	7.3e-36	4.8e-31	30.32	1370
gatataag	gatataag	1025	0	269.8	39	2.8e-36	1.8e-31	30.74	1371
caccccac	caccccac	9434	740	269.6	40	7.9e-36	5.2e-31	30.28	1372
ggcctcga	ggcctcga	3150	0	269.6	39	3.0e-36	2e-31	30.70	1373
ttatggga	ttatggga	1969	0	269.5	39	3.1e-36	2.1e-31	30.69	1374
gcggcgcg	gcggcgcg	6222	114	269.3	40	9.0e-36	5.9e-31	30.23	1375
acataggg	acataggg	1786	0	269.3	39	3.4e-36	2.3e-31	30.65	1376
cgttcccc	cgttcccc	2052	0	269.3	39	3.5e-36	2.3e-31	30.65	1377
ctgtgatc	ctgtgatc	3281	1	269.2	40	9.6e-36	6.3e-31	30.20	1378
catgggtg	catgggtg	3432	0	269.1	39	3.8e-36	2.5e-31	30.61	1379
cgcgccgc	cgcgccgc	6014	131	269.0	39	3.8e-36	2.5e-31	30.60	1380
ttgttccc	ttgttccc	3363	0	269.0	40	1.0e-35	6.8e-31	30.17	1381
ggggaacg	ggggaacg	1879	2	268.8	39	4.2e-36	2.7e-31	30.56	1382
cctatgta	cctatgta	1780	0	268.6	39	4.7e-36	3.1e-31	30.51	1383
cgggtagc	cgggtagc	1291	0	267.6	39	7.2e-36	4.7e-31	30.33	1384
cgcgcaca	cgcgcaca	2492	0	267.5	39	7.4e-36	4.9e-31	30.31	1385
ataaaata	ataaaata	6137	376	267.3	40	2.1e-35	1.4e-30	29.86	1386
tccatggg	tccatggg	3289	0	267.3	39	8.1e-36	5.3e-31	30.27	1387
ccgcgccc	ccgcgccc	7057	96	267.3	40	2.2e-35	1.4e-30	29.85	1388
tcaaaaga	tcaaaaga	3568	0	267.1	40	2.3e-35	1.5e-30	29.82	1389
agaaagaa	agaaagaa	12616	3300	266.8	40	2.6e-35	1.7e-30	29.76	1390
gccatctc	gccatctc	6324	0	266.8	40	2.7e-35	1.8e-30	29.75	1391
gtgccacc	gtgccacc	4386	0	266.8	39	1.0e-35	6.7e-31	30.18	1392
cgctgaca	cgctgaca	1521	0	266.5	39	1.1e-35	7.4e-31	30.13	1393
ccgcggcg	ccgcggcg	5353	0	266.4	39	1.2e-35	7.9e-31	30.10	1394
aagaaaga	aagaaaga	11298	3274	266.2	40	3.4e-35	2.2e-30	29.65	1395
accccacc	accccacc	9438	765	266.1	40	3.5e-35	2.3e-30	29.64	1396
cagccccc	cagccccc	8084	22	266.0	40	3.8e-35	2.5e-30	29.60	1397
ccaagata	ccaagata	1768	0	265.9	39	1.5e-35	9.7e-31	30.01	1398
gtcaagag	gtcaagag	2623	0	265.7	39	1.6e-35	1.1e-30	29.97	1399
aaagaaag	aaagaaag	12016	3291	265.2	40	5.3e-35	3.4e-30	29.46	1400
gccgcccg	gccgcccg	5797	18	264.7	39	2.5e-35	1.7e-30	29.78	1401
gcgcggcc	gcgcggcc	5503	0	264.6	39	2.6e-35	1.7e-30	29.78	1402
cggccgcc	cggccgcc	6556	13	264.6	40	6.8e-35	4.4e-30	29.35	1403
cactcagg	cactcagg	5391	0	264.5	40	7.1e-35	4.7e-30	29.33	1404
tttctttc	tttctttc	11599	3101	264.3	40	7.7e-35	5.1e-30	29.29	1405
caaatgtt	caaatgtt	2805	0	264.1	40	8.6e-35	5.6e-30	29.25	1406
cgccaggg	cgccaggg	3133	0	264.0	39	3.4e-35	2.2e-30	29.65	1407
cccaagga	cccaagga	5253	0	263.8	40	9.8e-35	6.4e-30	29.19	1408
ccttgcgg	ccttgcgg	1646	0	263.6	39	4.0e-35	2.6e-30	29.58	1409
taaaataa	taaaataa	6515	392	263.0	40	1.4e-34	9e-30	29.05	1410
cccagcaa	cccagcaa	6083	0	263.0	40	1.4e-34	9e-30	29.05	1411
caaaaaaa	caaaaaaa	8684	0	263.0	40	1.4e-34	9e-30	29.04	1412
atacaatt	atacaatt	1661	0	262.8	39	5.7e-35	3.7e-30	29.43	1413
tatttagc	tatttagc	1542	0	262.7	39	5.8e-35	3.8e-30	29.42	1414
cttgcggg	cttgcggg	1758	0	262.1	39	7.5e-35	4.9e-30	29.31	1415
agtgtcca	agtgtcca	3217	1	262.0	39	7.9e-35	5.2e-30	29.29	1416
gctgacac	gctgacac	2886	0	261.9	39	8.4e-35	5.5e-30	29.26	1417
tggaaatg	tggaaatg	4891	3	261.8	40	2.3e-34	1.5e-29	28.83	1418
cccccagc	cccccagc	9405	48	261.6	40	2.4e-34	1.6e-29	28.80	1419
tggtggct	tggtggct	7129	5	261.5	40	2.5e-34	1.7e-29	28.78	1420
ttaattaa	ttaattaa	3438	375	261.5	40	2.6e-34	1.7e-29	28.77	1421
agaaagta	agaaagta	3624	1	261.4	40	2.6e-34	1.7e-29	28.76	1422
gagtagta	gagtagta	1044	0	261.3	39	1.1e-34	6.9e-30	29.16	1423
acgtgtgt	acgtgtgt	2021	0	261.2	39	1.1e-34	7.5e-30	29.13	1424
gctgagta	gctgagta	1993	0	261.1	39	1.2e-34	7.8e-30	29.11	1425
gactgcca	gactgcca	2764	0	260.9	39	1.3e-34	8.4e-30	29.08	1426
tggcctcg	tggcctcg	3968	0	260.6	39	1.4e-34	9.4e-30	29.03	1427
tccatccc	tccatccc	6006	0	260.2	40	4.5e-34	3e-29	28.53	1428
gcgcgggc	gcgcgggc	6216	45	260.1	40	4.6e-34	3e-29	28.52	1429
gtaccgca	gtaccgca	827	0	259.9	39	2.0e-34	1.3e-29	28.89	1430
gcccccaa	gcccccaa	4712	0	259.9	40	5.1e-34	3.4e-29	28.47	1431
cgggcggg	cgggcggg	7009	690	259.9	40	5.2e-34	3.4e-29	28.47	1432
agcccagg	agcccagg	10272	0	259.5	40	6.1e-34	4e-29	28.40	1433
cacccatg	cacccatg	3599	0	259.3	39	2.5e-34	1.7e-29	28.78	1434
ttctttat	ttctttat	4025	2	259.3	40	6.7e-34	4.4e-29	28.36	1435
cgccgcgg	cgccgcgg	5076	0	259.2	39	2.6e-34	1.7e-29	28.76	1436
cctcctcc	cctcctcc	21033	6333	259.2	40	6.9e-34	4.5e-29	28.35	1437
gtctctag	gtctctag	3026	0	259.1	39	2.7e-34	1.8e-29	28.75	1438
gcccaggc	gcccaggc	9322	34	259.1	40	7.3e-34	4.8e-29	28.32	1439
cgggggcg	cgggggcg	6546	166	259.1	40	7.3e-34	4.8e-29	28.32	1440
gcccgcgc	gcccgcgc	5999	34	259.0	39	2.8e-34	1.8e-29	28.73	1441
tacatagg	tacatagg	1651	0	259.0	39	2.9e-34	1.9e-29	28.73	1442
ggtgagtg	ggtgagtg	5527	3	259.0	40	7.6e-34	5e-29	28.30	1443
tgggggac	tgggggac	4991	0	258.6	40	9.0e-34	5.9e-29	28.23	1444
tcccccct	tcccccct	5266	72	258.3	40	1.0e-33	6.6e-29	28.18	1445
gcctctct	gcctctct	7537	0	258.3	40	1.0e-33	6.8e-29	28.17	1446
tcctggaa	tcctggaa	8818	0	257.7	40	1.3e-33	8.7e-29	28.06	1447
tctctttc	tctctttc	8322	67	257.6	40	1.4e-33	9e-29	28.05	1448
tgagtaca	tgagtaca	2504	0	257.5	39	5.4e-34	3.5e-29	28.45	1449
gtctgtct	gtctgtct	7117	1598	257.5	40	1.4e-33	9.4e-29	28.03	1450
tcttgact	tcttgact	2720	2	257.2	39	6.2e-34	4.1e-29	28.39	1451
cacttggg	cacttggg	5621	0	257.1	40	1.7e-33	1.1e-28	27.95	1452
ttgttttt	ttgttttt	13014	1333	256.8	40	1.9e-33	1.3e-28	27.90	1453
tagcaaga	tagcaaga	2464	0	256.0	39	1.0e-33	6.8e-29	28.17	1454
ggtacata	ggtacata	1433	0	255.7	39	1.2e-33	7.6e-29	28.12	1455
gtggacac	gtggacac	3028	0	255.6	39	1.2e-33	8.1e-29	28.09	1456
gcccgggc	gcccgggc	6615	28	255.5	40	3.3e-33	2.2e-28	27.67	1457
ggcgcgcg	ggcgcgcg	5971	4	255.3	39	1.4e-33	9.2e-29	28.04	1458
ctgcctca	ctgcctca	9321	0	255.3	40	3.6e-33	2.4e-28	27.62	1459
aatgtgtg	aatgtgtg	3546	0	255.3	40	3.7e-33	2.4e-28	27.62	1460
acccccca	acccccca	5551	198	254.9	40	4.3e-33	2.8e-28	27.55	1461
taacattt	taacattt	2889	1	254.9	40	4.3e-33	2.8e-28	27.55	1462
tgctacat	tgctacat	2302	0	254.7	39	1.8e-33	1.2e-28	27.93	1463
tcccccac	tcccccac	8964	0	254.4	40	5.4e-33	3.6e-28	27.45	1464
ttatcagt	ttatcagt	1871	0	254.2	39	2.3e-33	1.5e-28	27.83	1465
accaaggg	accaaggg	3113	0	254.1	39	2.4e-33	1.6e-28	27.80	1466
gggccctg	gggccctg	6729	2	254.0	40	6.2e-33	4.1e-28	27.39	1467
acattatg	acattatg	1600	0	254.0	39	2.5e-33	1.6e-28	27.79	1468
tgggctaa	tgggctaa	2025	0	253.9	39	2.6e-33	1.7e-28	27.77	1469
gccaccac	gccaccac	7256	0	253.9	40	6.7e-33	4.4e-28	27.36	1470
ccaaaaag	ccaaaaag	3048	0	253.8	39	2.7e-33	1.8e-28	27.75	1471
cctaatta	cctaatta	1379	0	253.7	39	2.7e-33	1.8e-28	27.74	1472
tatcttgg	tatcttgg	1878	0	253.7	39	2.8e-33	1.8e-28	27.73	1473
gggctgga	gggctgga	8969	0	253.6	40	7.5e-33	4.9e-28	27.31	1474
tgtaccgc	tgtaccgc	910	0	253.5	39	3.0e-33	2e-28	27.71	1475
ccctcttc	ccctcttc	8929	6	253.5	40	7.9e-33	5.2e-28	27.28	1476
ctgggtcc	ctgggtcc	6209	1	253.4	40	8.1e-33	5.3e-28	27.28	1477
gactgcgg	gactgcgg	2077	0	253.4	39	3.2e-33	2.1e-28	27.68	1478
gtgttttg	gtgttttg	4346	5	253.4	40	8.1e-33	5.3e-28	27.27	1479
gagctccg	gagctccg	3125	4	253.4	39	3.2e-33	2.1e-28	27.68	1480
tcgagtcg	tcgagtcg	603	6	253.4	39	3.2e-33	2.1e-28	27.68	1481
agagaaac	agagaaac	8223	0	253.2	40	9.0e-33	5.9e-28	27.23	1482
gcccaggg	gcccaggg	8234	3	253.1	40	9.3e-33	6.1e-28	27.21	1483
ggatatgg	ggatatgg	2123	1	253.0	39	3.8e-33	2.5e-28	27.60	1484
gatctgca	gatctgca	2593	0	252.9	39	4.0e-33	2.6e-28	27.59	1485
agtagtac	agtagtac	832	0	252.4	39	4.8e-33	3.2e-28	27.50	1486
ttttcatt	ttttcatt	4973	18	252.4	40	1.3e-32	8.3e-28	27.08	1487
ctgataag	ctgataag	1718	0	252.3	39	5.0e-33	3.3e-28	27.48	1488
aaggggga	aaggggga	5528	28	252.2	40	1.4e-32	8.9e-28	27.05	1489
ccccccag	ccccccag	5716	0	251.9	40	1.5e-32	1e-27	27.00	1490
cactgata	cactgata	1747	0	251.9	39	6.0e-33	3.9e-28	27.41	1491
ttccacct	ttccacct	4944	1	251.6	40	1.8e-32	1.2e-27	26.93	1492
gtacatat	gtacatat	1759	0	251.5	39	7.2e-33	4.7e-28	27.33	1493
tccagtga	tccagtga	3616	0	251.5	40	1.9e-32	1.2e-27	26.92	1494
aaattgta	aaattgta	1912	0	251.2	39	8.0e-33	5.2e-28	27.28	1495
tgcagatc	tgcagatc	2764	0	251.2	39	8.2e-33	5.4e-28	27.27	1496
cctgagtg	cctgagtg	5407	0	251.1	40	2.1e-32	1.4e-27	26.85	1497
cctgggct	cctgggct	10243	0	251.1	40	2.2e-32	1.4e-27	26.85	1498
aacatttg	aacatttg	2874	0	251.1	40	2.2e-32	1.4e-27	26.85	1499
ttgggggc	ttgggggc	4555	0	251.0	40	2.2e-32	1.5e-27	26.83	1500
ttctcatt	ttctcatt	5253	3	250.6	40	2.7e-32	1.8e-27	26.75	1501
ctagatgg	ctagatgg	1964	0	250.6	39	1.0e-32	6.9e-28	27.16	1502
aatttaaa	aatttaaa	4459	18	250.4	40	3.0e-32	1.9e-27	26.71	1503
tgtgtaca	tgtgtaca	3958	0	250.3	40	3.0e-32	2e-27	26.70	1504
taaatttt	taaatttt	3629	3	250.2	40	3.2e-32	2.1e-27	26.67	1505
ggctgggg	ggctgggg	13875	517	250.0	40	3.4e-32	2.2e-27	26.65	1506
ggctggag	ggctggag	11194	4	249.7	40	3.9e-32	2.6e-27	26.59	1507
ccatcctt	ccatcctt	4667	0	249.5	40	4.3e-32	2.8e-27	26.55	1508
cctggggc	cctggggc	8186	6	249.4	40	4.5e-32	3e-27	26.53	1509
ccgccgcg	ccgccgcg	6152	0	249.3	40	4.6e-32	3e-27	26.52	1510
ctacatat	ctacatat	2132	0	249.1	39	2.0e-32	1.3e-27	26.89	1511
ataaagaa	ataaagaa	3958	2	248.8	40	5.9e-32	3.9e-27	26.41	1512
tagtgtgt	tagtgtgt	2449	1	248.6	39	2.4e-32	1.6e-27	26.80	1513
tatgtacc	tatgtacc	1388	0	248.5	39	2.6e-32	1.7e-27	26.77	1514
gcacttgg	gcacttgg	5056	0	248.4	40	6.8e-32	4.4e-27	26.35	1515
agcctggg	agcctggg	10214	0	248.4	40	6.9e-32	4.5e-27	26.35	1516
ggacccag	ggacccag	6271	19	248.3	40	7.1e-32	4.6e-27	26.33	1517
acgggacc	acgggacc	1205	0	248.0	39	3.2e-32	2.1e-27	26.68	1518
tccacact	tccacact	3838	2	247.9	40	8.3e-32	5.5e-27	26.26	1519
ttacctca	ttacctca	2251	0	247.9	39	3.3e-32	2.1e-27	26.67	1520
gcctgggc	gcctgggc	9099	39	247.9	40	8.5e-32	5.6e-27	26.25	1521
cattatga	cattatga	1667	0	247.9	39	3.3e-32	2.2e-27	26.66	1522
aaaattaa	aaaattaa	5068	52	247.7	40	9.1e-32	6e-27	26.22	1523
aaaaaatt	aaaaaatt	5224	0	247.7	40	9.3e-32	6.1e-27	26.22	1524
cacctgcc	cacctgcc	7963	3	247.5	40	9.8e-32	6.4e-27	26.19	1525
ccatctag	ccatctag	1946	0	247.5	39	3.9e-32	2.6e-27	26.59	1526
tgtacaca	tgtacaca	4016	0	247.5	40	1.0e-31	6.7e-27	26.18	1527
aaaaaatg	aaaaaatg	5195	0	247.2	40	1.1e-31	7.4e-27	26.13	1528
cccctgcc	cccctgcc	12185	333	247.2	40	1.1e-31	7.5e-27	26.13	1529
gcgcgccc	gcgcgccc	5550	0	246.6	39	5.8e-32	3.8e-27	26.42	1530
agcaagat	agcaagat	2944	0	246.6	39	5.8e-32	3.8e-27	26.42	1531
tgtctgtc	tgtctgtc	7782	1659	246.6	40	1.5e-31	9.7e-27	26.01	1532
atggatgg	atggatgg	5810	1334	246.6	40	1.5e-31	9.8e-27	26.01	1533
tcccgtgt	tcccgtgt	1675	1	246.5	39	6.1e-32	4e-27	26.40	1534
gcgattgg	gcgattgg	1050	0	246.3	39	6.7e-32	4.4e-27	26.36	1535
aaatatct	aaatatct	3092	0	245.8	40	2.1e-31	1.4e-26	25.87	1536
ggcggcgc	ggcggcgc	6880	0	245.8	40	2.1e-31	1.4e-26	25.86	1537
gaaggagt	gaaggagt	3430	0	245.4	40	2.4e-31	1.6e-26	25.80	1538
ctcctgcc	ctcctgcc	11204	25	245.4	40	2.4e-31	1.6e-26	25.80	1539
atgtactc	atgtactc	1420	0	245.4	39	9.8e-32	6.4e-27	26.19	1540
ctcttgac	ctcttgac	2496	3	245.2	39	1.0e-31	6.7e-27	26.17	1541
aagtgtgt	aagtgtgt	4357	0	245.1	40	2.8e-31	1.8e-26	25.74	1542
gggaaggg	gggaaggg	13709	871	245.0	40	2.9e-31	1.9e-26	25.72	1543
gtgtagcc	gtgtagcc	3950	0	244.9	40	3.0e-31	1.9e-26	25.71	1544
gggctccc	gggctccc	6335	0	244.8	40	3.1e-31	2e-26	25.69	1545
ttcattta	ttcattta	3669	0	244.7	40	3.3e-31	2.2e-26	25.67	1546
cgcgcccc	cgcgcccc	6131	38	244.6	39	1.3e-31	8.8e-27	26.06	1547
cccccagg	cccccagg	6560	0	244.3	40	4.0e-31	2.6e-26	25.59	1548
tcccataa	tcccataa	1934	0	244.1	39	1.6e-31	1.1e-26	25.97	1549
aggcaggt	aggcaggt	6539	0	244.1	40	4.2e-31	2.8e-26	25.56	1550
cggcggcc	cggcggcc	6129	0	243.9	40	4.6e-31	3e-26	25.52	1551
ttaatttt	ttaatttt	5028	40	243.6	40	5.1e-31	3.4e-26	25.47	1552
tagatatt	tagatatt	1788	2	243.5	39	2.1e-31	1.4e-26	25.86	1553
cccgcggc	cccgcggc	5513	6	243.4	39	2.2e-31	1.5e-26	25.83	1554
tctgtctg	tctgtctg	8551	1486	243.4	40	5.7e-31	3.7e-26	25.43	1555
ccccagcc	ccccagcc	14321	549	243.3	40	5.9e-31	3.9e-26	25.41	1556
cgcgcggg	cgcgcggg	4803	0	243.3	39	2.4e-31	1.6e-26	25.80	1557
cctggggg	cctggggg	6753	0	243.0	40	6.8e-31	4.5e-26	25.35	1558
gcctgggg	gcctgggg	8203	7	242.8	40	7.5e-31	4.9e-26	25.31	1559
agactgcg	agactgcg	1458	0	242.6	39	3.1e-31	2e-26	25.69	1560
agagatgg	agagatgg	8055	0	242.4	40	8.7e-31	5.7e-26	25.24	1561
gcctcgaa	gcctcgaa	2885	0	242.3	39	3.6e-31	2.3e-26	25.63	1562
cccaggct	cccaggct	10457	0	241.9	40	1.1e-30	6.9e-26	25.16	1563
tgggtcct	tgggtcct	5220	1	241.8	40	1.1e-30	7.2e-26	25.14	1564
aagagaca	aagagaca	5357	3	241.3	40	1.4e-30	9.2e-26	25.04	1565
ccctgtga	ccctgtga	4359	0	241.1	40	1.5e-30	9.9e-26	25.01	1566
gggtatcc	gggtatcc	1441	0	240.9	39	6.5e-31	4.3e-26	25.37	1567
acagctat	acagctat	2360	0	240.8	39	6.8e-31	4.5e-26	25.35	1568
gcccgccc	gcccgccc	8180	694	240.6	40	1.9e-30	1.2e-25	24.91	1569
ttgtgccc	ttgtgccc	2561	0	240.1	39	9.0e-31	5.9e-26	25.23	1570
taccgcag	taccgcag	977	0	240.0	39	9.5e-31	6.3e-26	25.20	1571
cctgatat	cctgatat	1530	0	239.9	39	9.8e-31	6.4e-26	25.19	1572
ccaggtcc	ccaggtcc	6574	12	239.9	40	2.5e-30	1.7e-25	24.78	1573
ggccgccg	ggccgccg	5891	11	239.8	39	1.0e-30	6.7e-26	25.17	1574
ccaagtgc	ccaagtgc	5173	0	239.7	40	2.7e-30	1.8e-25	24.75	1575
tccttcct	tccttcct	13111	3180	239.7	40	2.7e-30	1.8e-25	24.75	1576
ttgtgaga	ttgtgaga	2844	0	239.6	40	2.8e-30	1.8e-25	24.74	1577
gggtgttt	gggtgttt	3291	0	239.5	40	3.0e-30	1.9e-25	24.71	1578
taaaggga	taaaggga	3148	0	239.4	40	3.1e-30	2.1e-25	24.69	1579
gcaaccac	gcaaccac	3083	0	239.3	39	1.3e-30	8.5e-26	25.07	1580
tttctcat	tttctcat	5306	3	239.2	40	3.3e-30	2.2e-25	24.66	1581
ctggcctg	ctggcctg	8207	57	239.2	40	3.4e-30	2.2e-25	24.66	1582
acagtcag	acagtcag	4662	0	239.2	40	3.4e-30	2.2e-25	24.65	1583
ttgctggg	ttgctggg	6081	0	239.2	40	3.4e-30	2.2e-25	24.65	1584
agtcaaga	agtcaaga	2720	0	239.0	39	1.5e-30	9.7e-26	25.02	1585
cgaggcca	cgaggcca	3938	0	238.9	39	1.5e-30	1e-25	25.00	1586
ccatccca	ccatccca	5799	63	238.8	40	4.0e-30	2.6e-25	24.59	1587
aggatgat	aggatgat	2328	0	238.8	39	1.6e-30	1.1e-25	24.98	1588
cccctctc	cccctctc	9588	139	238.7	40	4.2e-30	2.7e-25	24.57	1589
aattttta	aattttta	3661	8	238.6	40	4.3e-30	2.8e-25	24.55	1590
ccaccatg	ccaccatg	6806	0	238.5	40	4.4e-30	2.9e-25	24.54	1591
ccctgcct	ccctgcct	12258	0	238.5	40	4.4e-30	2.9e-25	24.54	1592
ttggtata	ttggtata	1155	0	238.3	39	2.0e-30	1.3e-25	24.89	1593
cgagtcga	cgagtcga	623	4	238.0	39	2.2e-30	1.4e-25	24.84	1594
gcgggggc	gcgggggc	7061	168	237.9	40	5.9e-30	3.8e-25	24.41	1595
ggggcagg	ggggcagg	12073	266	237.8	40	5.9e-30	3.9e-25	24.41	1596
ttatgaac	ttatgaac	1502	0	237.7	39	2.5e-30	1.6e-25	24.79	1597
ctacacag	ctacacag	5545	0	237.7	40	6.2e-30	4.1e-25	24.39	1598
ggccgggg	ggccgggg	7007	100	237.4	40	7.1e-30	4.7e-25	24.33	1599
tgcataca	tgcataca	3505	0	237.3	40	7.5e-30	4.9e-25	24.31	1600
acgctgac	acgctgac	1214	0	237.2	39	3.1e-30	2e-25	24.69	1601
aattaatt	aattaatt	3264	387	237.2	40	7.8e-30	5.1e-25	24.29	1602
actcgagc	actcgagc	1217	0	237.0	39	3.4e-30	2.3e-25	24.65	1603
ctatacca	ctatacca	1520	0	236.9	39	3.6e-30	2.4e-25	24.63	1604
aataaaga	aataaaga	4054	1	236.7	40	9.4e-30	6.2e-25	24.21	1605
atgccctc	atgccctc	3770	0	236.6	40	1.0e-29	6.6e-25	24.18	1606
ttccatgg	ttccatgg	3194	0	236.5	40	1.0e-29	6.8e-25	24.17	1607
atatgtag	atatgtag	2051	0	236.4	39	4.4e-30	2.9e-25	24.54	1608
tgccgggg	tgccgggg	2602	0	236.2	39	4.7e-30	3.1e-25	24.51	1609
gagttcga	gagttcga	2841	0	236.1	39	4.9e-30	3.2e-25	24.49	1610
tagatggt	tagatggt	1817	0	236.0	39	5.1e-30	3.3e-25	24.48	1611
tttgctga	tttgctga	3314	0	236.0	40	1.3e-29	8.6e-25	24.07	1612
cctcgaac	cctcgaac	2909	1	235.7	39	5.9e-30	3.9e-25	24.41	1613
ggtggcac	ggtggcac	4382	0	235.6	40	1.5e-29	9.8e-25	24.01	1614
atggggga	atggggga	5002	8	235.6	40	1.5e-29	9.9e-25	24.00	1615
aacaaaaa	aacaaaaa	11318	1067	235.5	40	1.6e-29	1e-24	23.98	1616
gaaagaga	gaaagaga	8381	106	235.5	40	1.6e-29	1e-24	23.98	1617
cacatggt	cacatggt	4568	0	235.3	40	1.7e-29	1.1e-24	23.95	1618
gggtttct	gggtttct	7052	0	235.3	40	1.7e-29	1.1e-24	23.94	1619
ctgccccc	ctgccccc	8282	43	234.9	40	2.1e-29	1.3e-24	23.87	1620
attggatt	attggatt	1793	3	234.8	39	8.7e-30	5.7e-25	24.24	1621
ggggcccc	ggggcccc	4969	0	234.8	39	8.7e-30	5.7e-25	24.24	1622
ggctcaca	ggctcaca	5983	0	234.5	40	2.4e-29	1.6e-24	23.80	1623
gtgctctt	gtgctctt	4456	0	234.5	40	2.4e-29	1.6e-24	23.80	1624
agttcgag	agttcgag	2791	0	234.4	39	1.0e-29	6.5e-25	24.18	1625
gttgctgg	gttgctgg	4694	1	234.1	40	2.8e-29	1.8e-24	23.73	1626
ggcaggag	ggcaggag	10746	57	234.1	40	2.9e-29	1.9e-24	23.73	1627
cctggagg	cctggagg	8451	0	233.9	40	3.1e-29	2e-24	23.69	1628
gatccctg	gatccctg	3512	1	233.7	39	1.4e-29	8.9e-25	24.05	1629
gcgcccgc	gcgcccgc	5299	44	233.6	39	1.4e-29	9.2e-25	24.04	1630
ctttcagc	ctttcagc	3424	2	233.6	40	3.5e-29	2.3e-24	23.64	1631
cgccgcgc	cgccgcgc	6001	150	233.4	39	1.5e-29	1e-24	24.00	1632
tttcattt	tttcattt	5837	46	233.3	40	4.0e-29	2.6e-24	23.58	1633
ggggaagg	ggggaagg	11349	157	233.2	40	4.1e-29	2.7e-24	23.57	1634
acatattg	acatattg	1222	0	233.2	39	1.7e-29	1.1e-24	23.96	1635
tccggggt	tccggggt	1899	1	233.2	39	1.7e-29	1.1e-24	23.96	1636
agtcccgt	agtcccgt	1213	0	233.0	39	1.8e-29	1.2e-24	23.92	1637
cagctaca	cagctaca	4540	2	232.9	40	4.7e-29	3.1e-24	23.51	1638
aaaaatta	aaaaatta	4696	13	232.9	40	4.8e-29	3.1e-24	23.50	1639
ttgtatct	ttgtatct	2158	24	232.8	39	2.0e-29	1.3e-24	23.89	1640
acacccat	acacccat	3027	0	232.8	39	2.0e-29	1.3e-24	23.88	1641
ccctccag	ccctccag	7427	0	232.8	40	5.0e-29	3.3e-24	23.49	1642
ccctggcc	ccctggcc	8376	46	232.7	40	5.2e-29	3.4e-24	23.47	1643
gagggcat	gagggcat	3862	0	232.6	40	5.3e-29	3.5e-24	23.46	1644
tactactc	tactactc	1017	0	232.5	39	2.2e-29	1.5e-24	23.83	1645
gttttttt	gttttttt	8623	0	232.5	40	5.6e-29	3.7e-24	23.43	1646
ccccccaa	ccccccaa	6109	0	232.3	40	6.1e-29	4e-24	23.40	1647
cgcgggcg	cgcgggcg	4982	46	232.2	39	2.6e-29	1.7e-24	23.77	1648
atagctgt	atagctgt	2336	0	232.0	39	2.7e-29	1.8e-24	23.74	1649
gtgaggta	gtgaggta	1918	0	232.0	39	2.8e-29	1.8e-24	23.74	1650
catggtgg	catggtgg	6759	0	231.9	40	7.3e-29	4.8e-24	23.32	1651
ttattaga	ttattaga	1599	0	231.8	39	3.1e-29	2e-24	23.69	1652
cgcggcgc	cgcggcgc	5105	74	231.7	39	3.1e-29	2e-24	23.69	1653
ggctcagt	ggctcagt	5902	0	231.6	40	8.0e-29	5.2e-24	23.28	1654
agggatcc	agggatcc	3032	0	231.5	39	3.4e-29	2.2e-24	23.66	1655
gccctctt	gccctctt	4841	0	231.4	40	9.0e-29	5.9e-24	23.23	1656
tttaaaat	tttaaaat	7022	4	231.3	40	9.1e-29	6e-24	23.23	1657
tcgaactc	tcgaactc	2849	0	231.3	39	3.7e-29	2.5e-24	23.61	1658
ccctatgt	ccctatgt	1917	0	231.1	39	4.1e-29	2.7e-24	23.58	1659
ctctccag	ctctccag	9358	0	231.1	40	1.0e-28	6.6e-24	23.18	1660
gtatctta	gtatctta	1246	0	231.1	39	4.1e-29	2.7e-24	23.57	1661
ccccactc	ccccactc	7599	10	231.0	40	1.0e-28	6.8e-24	23.17	1662
tattagat	tattagat	1268	6	230.9	39	4.3e-29	2.8e-24	23.55	1663
gatccctt	gatccctt	2304	0	230.9	39	4.5e-29	3e-24	23.53	1664
cagcaaaa	cagcaaaa	3322	0	230.9	40	1.1e-28	7.3e-24	23.14	1665
accgcagt	accgcagt	1151	0	230.7	39	4.8e-29	3.1e-24	23.50	1666
cgggcggc	cgggcggc	5902	50	230.7	39	4.8e-29	3.1e-24	23.50	1667
tcccaaaa	tcccaaaa	3088	0	230.5	40	1.3e-28	8.6e-24	23.07	1668
tccctatg	tccctatg	2215	0	230.4	39	5.5e-29	3.6e-24	23.44	1669
caatccaa	caatccaa	1704	1	230.2	39	6.1e-29	4e-24	23.40	1670
tccctggg	tccctggg	8475	0	230.1	40	1.5e-28	9.9e-24	23.00	1671
gatggatg	gatggatg	5169	1387	229.8	40	1.8e-28	1.1e-23	22.94	1672
ccgggtag	ccgggtag	1462	0	229.7	39	7.3e-29	4.8e-24	23.32	1673
cgcggcgg	cgcggcgg	6070	0	229.3	40	2.1e-28	1.4e-23	22.86	1674
tgtgtgat	tgtgtgat	3158	2	229.2	40	2.2e-28	1.4e-23	22.85	1675
gagagggg	gagagggg	9613	117	229.2	40	2.2e-28	1.4e-23	22.84	1676
ttttgctg	ttttgctg	3531	0	229.2	40	2.3e-28	1.5e-23	22.83	1677
tgagtgga	tgagtgga	3392	0	229.0	40	2.4e-28	1.6e-23	22.81	1678
taacacac	taacacac	2046	0	229.0	39	1.0e-28	6.6e-24	23.18	1679
acacatat	acacatat	4251	0	228.9	40	2.5e-28	1.6e-23	22.78	1680
attatgaa	attatgaa	1975	0	228.9	39	1.0e-28	6.8e-24	23.17	1681
cgcgcgat	cgcgcgat	668	0	228.8	39	1.1e-28	7.1e-24	23.15	1682
ctgggggg	ctgggggg	6006	0	228.7	40	2.8e-28	1.8e-23	22.74	1683
aaatgaaa	aaatgaaa	5645	38	228.3	40	3.3e-28	2.1e-23	22.67	1684
accccgga	accccgga	1889	2	228.1	39	1.4e-28	9.5e-24	23.02	1685
tctctgta	tctctgta	5622	0	227.9	40	3.8e-28	2.5e-23	22.60	1686
cgcgcccg	cgcgcccg	4423	32	227.9	39	1.6e-28	1e-23	22.99	1687
ccattttt	ccattttt	3718	0	227.7	40	4.2e-28	2.7e-23	22.56	1688
tgagttcg	tgagttcg	2669	0	227.7	39	1.7e-28	1.1e-23	22.95	1689
gccaggca	gccaggca	6873	0	227.5	40	4.4e-28	2.9e-23	22.54	1690
cgcggccg	cgcggccg	5182	5	227.5	39	1.8e-28	1.2e-23	22.92	1691
tctccccc	tctccccc	7063	0	227.5	40	4.5e-28	2.9e-23	22.53	1692
ctacagag	ctacagag	6012	0	227.4	40	4.7e-28	3.1e-23	22.51	1693
tcgactcg	tcgactcg	576	1	227.4	39	2.0e-28	1.3e-23	22.89	1694
ctcgagtc	ctcgagtc	1390	332	227.3	39	2.0e-28	1.3e-23	22.88	1695
agggcatc	agggcatc	3853	0	227.3	40	5.0e-28	3.3e-23	22.49	1696
tctctccc	tctctccc	11218	0	227.3	40	5.0e-28	3.3e-23	22.48	1697
tccaatcg	tccaatcg	773	0	227.2	39	2.1e-28	1.4e-23	22.87	1698
cgcccgcg	cgcccgcg	4656	31	227.2	39	2.1e-28	1.4e-23	22.87	1699
aggcaggg	aggcaggg	10937	0	227.2	40	5.2e-28	3.4e-23	22.47	1700
catccatc	catccatc	4875	1226	226.8	40	6.0e-28	3.9e-23	22.40	1701
cctgtgat	cctgtgat	3510	0	226.7	40	6.4e-28	4.2e-23	22.38	1702
ctctcccc	ctctcccc	11014	150	226.6	40	6.6e-28	4.3e-23	22.36	1703
gggaggag	gggaggag	17178	105	226.3	40	7.6e-28	5e-23	22.30	1704
attatttt	attatttt	5092	0	226.2	40	7.7e-28	5e-23	22.30	1705
tgagacag	tgagacag	7242	0	226.2	40	7.7e-28	5e-23	22.30	1706
gggccagc	gggccagc	6097	0	226.1	40	8.2e-28	5.4e-23	22.27	1707
ctcctccc	ctcctccc	17373	164	225.9	40	8.9e-28	5.9e-23	22.23	1708
catcccat	catcccat	3459	38	225.7	40	9.4e-28	6.2e-23	22.21	1709
aatatcca	aatatcca	2356	0	225.7	39	4.0e-28	2.6e-23	22.59	1710
tttttgtt	tttttgtt	11407	1044	225.7	40	9.8e-28	6.4e-23	22.19	1711
gctacata	gctacata	3067	0	225.7	40	9.8e-28	6.4e-23	22.19	1712
agagaaaa	agagaaaa	7786	14	225.5	40	1.0e-27	6.8e-23	22.17	1713
ggcgccgc	ggcgccgc	5252	0	225.5	39	4.3e-28	2.8e-23	22.55	1714
cggccccg	cggccccg	5777	77	225.5	39	4.3e-28	2.8e-23	22.55	1715
ttccctat	ttccctat	2427	3	225.4	39	4.5e-28	2.9e-23	22.53	1716
gcgccgcg	gcgccgcg	4891	97	225.4	39	4.5e-28	3e-23	22.53	1717
attcccct	attcccct	3261	0	225.1	40	1.2e-27	8.2e-23	22.09	1718
ctccagcc	ctccagcc	11152	7	225.0	40	1.3e-27	8.5e-23	22.07	1719
gtgtgtta	gtgtgtta	1977	0	225.0	39	5.4e-28	3.5e-23	22.45	1720
agatattt	agatattt	3073	0	224.8	40	1.4e-27	9e-23	22.05	1721
gggtatgg	gggtatgg	2668	6	224.8	39	5.7e-28	3.7e-23	22.43	1722
ggggcgcg	ggggcgcg	6059	40	224.7	40	1.5e-27	9.6e-23	22.02	1723
tgtttttt	tgtttttt	8523	367	224.6	40	1.5e-27	9.8e-23	22.01	1724
aactcact	aactcact	6135	0	224.5	40	1.6e-27	1e-22	21.98	1725
aggggaat	aggggaat	3000	0	224.5	39	6.6e-28	4.3e-23	22.36	1726
cccaggga	cccaggga	8507	0	224.4	40	1.7e-27	1.1e-22	21.96	1727
tcccctgg	tcccctgg	5345	0	224.4	40	1.7e-27	1.1e-22	21.96	1728
ccttggtc	ccttggtc	3856	2	224.4	40	1.7e-27	1.1e-22	21.96	1729
taattttt	taattttt	4716	16	224.3	40	1.7e-27	1.1e-22	21.96	1730
ggaatgcc	ggaatgcc	2348	0	224.3	39	7.0e-28	4.6e-23	22.34	1731
tcttctgg	tcttctgg	6928	0	224.1	40	1.8e-27	1.2e-22	21.92	1732
atcatcct	atcatcct	2145	0	224.1	39	7.6e-28	5e-23	22.30	1733
ttctgtgt	ttctgtgt	6113	7	223.9	40	2.0e-27	1.3e-22	21.88	1734
gccgcccc	gccgcccc	6554	0	223.8	40	2.1e-27	1.4e-22	21.87	1735
ctccaaac	ctccaaac	3646	3	223.8	40	2.1e-27	1.4e-22	21.85	1736
cagcaacc	cagcaacc	4459	0	223.6	40	2.3e-27	1.5e-22	21.82	1737
ttgcaagt	ttgcaagt	1978	1	223.4	39	1.0e-27	6.6e-23	22.18	1738
acagctac	acagctac	3329	1	223.4	39	1.0e-27	6.7e-23	22.17	1739
gcaggcag	gcaggcag	11227	913	223.4	40	2.5e-27	1.6e-22	21.79	1740
ttggagct	ttggagct	3633	0	223.4	40	2.5e-27	1.7e-22	21.78	1741
aaaaatat	aaaaatat	4854	0	223.3	40	2.6e-27	1.7e-22	21.78	1742
tccagccc	tccagccc	8833	0	223.1	40	2.8e-27	1.8e-22	21.74	1743
caagggcc	caagggcc	3921	6	223.0	39	1.2e-27	7.9e-23	22.10	1744
aaacgctg	aaacgctg	1418	0	222.9	39	1.2e-27	8.2e-23	22.09	1745
gcacacgc	gcacacgc	2810	159	222.8	39	1.3e-27	8.5e-23	22.07	1746
ccatatcc	ccatatcc	2053	1	222.6	39	1.4e-27	9.5e-23	22.02	1747
tatgtact	tatgtact	1448	1	222.5	39	1.5e-27	9.7e-23	22.01	1748
cccctggc	cccctggc	5870	1	222.5	40	3.6e-27	2.4e-22	21.63	1749
ctcagtgg	ctcagtgg	7007	0	222.4	40	3.8e-27	2.5e-22	21.60	1750
ggcattcc	ggcattcc	2420	0	222.3	39	1.6e-27	1.1e-22	21.98	1751
ccgtgtgt	ccgtgtgt	1712	0	222.2	39	1.7e-27	1.1e-22	21.95	1752
aaataaag	aaataaag	5004	0	222.1	40	4.3e-27	2.8e-22	21.55	1753
taggggag	taggggag	3482	0	221.8	39	2.0e-27	1.3e-22	21.88	1754
ggggaatg	ggggaatg	3588	2	221.8	39	2.0e-27	1.3e-22	21.88	1755
ccccgccg	ccccgccg	6040	0	221.5	39	2.3e-27	1.5e-22	21.82	1756
cggccgcg	cggccgcg	5359	20	221.4	39	2.3e-27	1.5e-22	21.81	1757
tttgttcc	tttgttcc	3573	0	221.4	40	5.7e-27	3.7e-22	21.43	1758
actttctc	actttctc	4382	0	221.2	40	6.2e-27	4.1e-22	21.39	1759
cgcccccg	cgcccccg	6405	166	221.1	40	6.5e-27	4.2e-22	21.37	1760
gcgggtgt	gcgggtgt	2090	0	221.1	39	2.7e-27	1.8e-22	21.75	1761
ggccgggc	ggccgggc	6709	177	221.0	40	6.6e-27	4.4e-22	21.36	1762
cgcagtct	cgcagtct	1388	0	221.0	39	2.9e-27	1.9e-22	21.73	1763
ccggcgcc	ccggcgcc	4369	36	220.9	39	2.9e-27	1.9e-22	21.72	1764
ggcccggg	ggcccggg	7489	39	220.7	40	7.5e-27	4.9e-22	21.31	1765
aagagcac	aagagcac	4516	0	220.7	40	7.6e-27	5e-22	21.30	1766
ggcccagg	ggcccagg	8651	49	220.7	40	7.7e-27	5e-22	21.30	1767
ggcccttg	ggcccttg	3816	1	220.7	39	3.2e-27	2.1e-22	21.68	1768
cccgggcc	cccgggcc	7392	38	220.7	40	7.8e-27	5.1e-22	21.29	1769
atggagga	atggagga	5435	0	220.6	40	8.1e-27	5.3e-22	21.28	1770
cagggatc	cagggatc	3424	3	220.6	39	3.4e-27	2.2e-22	21.66	1771
atggctca	atggctca	5831	0	220.4	40	8.8e-27	5.8e-22	21.24	1772
aggtggaa	aggtggaa	4501	3	220.3	40	8.9e-27	5.9e-22	21.23	1773
caaccatc	caaccatc	3418	0	220.3	39	3.8e-27	2.5e-22	21.61	1774
tgatgccc	tgatgccc	3668	0	220.2	39	4.0e-27	2.6e-22	21.59	1775
gcagatcc	gcagatcc	2992	0	220.2	39	4.0e-27	2.6e-22	21.58	1776
cgggtgtt	cgggtgtt	1324	0	220.1	39	4.1e-27	2.7e-22	21.58	1777
cgaaagga	cgaaagga	1040	0	220.0	39	4.2e-27	2.7e-22	21.56	1778
gttccgcg	gttccgcg	967	0	220.0	39	4.3e-27	2.8e-22	21.55	1779
gagactgc	gagactgc	3957	0	219.8	40	1.1e-26	7.2e-22	21.14	1780
ctcttctg	ctcttctg	8576	0	219.6	40	1.2e-26	8e-22	21.10	1781
gcaaattg	gcaaattg	1320	0	219.5	39	5.3e-27	3.5e-22	21.46	1782
gcgcgatt	gcgcgatt	603	0	219.4	39	5.4e-27	3.5e-22	21.45	1783
tgccatat	tgccatat	2241	0	219.4	39	5.5e-27	3.6e-22	21.44	1784
aaaaacaa	aaaaacaa	12683	1299	219.4	40	1.3e-26	8.8e-22	21.06	1785
actcacca	actcacca	3407	0	219.3	39	5.7e-27	3.7e-22	21.43	1786
cgctcgac	cgctcgac	741	0	219.3	39	5.8e-27	3.8e-22	21.42	1787
accatgtg	accatgtg	4389	0	219.3	40	1.4e-26	9.1e-22	21.04	1788
actgcggt	actgcggt	1182	0	219.2	39	6.0e-27	3.9e-22	21.41	1789
tgtactca	tgtactca	2434	0	219.1	39	6.3e-27	4.1e-22	21.38	1790
gaccaagg	gaccaagg	3856	4	219.0	39	6.4e-27	4.2e-22	21.38	1791
agatccct	agatccct	2990	0	219.0	39	6.4e-27	4.2e-22	21.37	1792
ctggcctt	ctggcctt	7129	0	218.9	40	1.6e-26	1e-21	20.98	1793
tctctgtc	tctctgtc	8118	468	218.8	40	1.7e-26	1.1e-21	20.95	1794
gccgcgcc	gccgcgcc	5816	137	218.7	39	7.4e-27	4.9e-22	21.31	1795
ctaattaa	ctaattaa	1951	0	218.5	39	7.9e-27	5.2e-22	21.29	1796
ctcgaact	ctcgaact	2852	0	218.4	39	8.1e-27	5.3e-22	21.27	1797
ccagcaac	ccagcaac	4775	0	218.4	40	2.0e-26	1.3e-21	20.89	1798
tcagtgag	tcagtgag	4319	0	218.3	40	2.1e-26	1.4e-21	20.87	1799
ccttctta	ccttctta	2519	0	218.3	39	8.7e-27	5.7e-22	21.25	1800
ctttcttt	ctttcttt	11597	3190	218.2	40	2.1e-26	1.4e-21	20.86	1801
actttgtc	actttgtc	2421	0	218.2	39	8.9e-27	5.8e-22	21.24	1802
gactcgag	gactcgag	1304	277	218.2	39	8.9e-27	5.8e-22	21.23	1803
ttaatagc	ttaatagc	1316	0	217.7	39	1.1e-26	7.2e-22	21.14	1804
aattgtat	aattgtat	1691	0	217.6	39	1.1e-26	7.5e-22	21.13	1805
cttgactc	cttgactc	2585	2	217.6	39	1.1e-26	7.5e-22	21.13	1806
gcgcgcgc	gcgcgcgc	8229	3518	217.6	40	2.8e-26	1.8e-21	20.74	1807
tgtgatcc	tgtgatcc	2795	0	217.6	39	1.2e-26	7.7e-22	21.11	1808
atttagct	atttagct	1882	0	217.3	39	1.3e-26	8.5e-22	21.07	1809
taagagca	taagagca	4407	0	217.1	40	3.3e-26	2.2e-21	20.66	1810
cagcactc	cagcactc	5464	0	217.1	40	3.3e-26	2.2e-21	20.66	1811
gtggggga	gtggggga	8809	0	217.1	40	3.4e-26	2.2e-21	20.66	1812
tgcgggtg	tgcgggtg	2581	12	217.0	39	1.5e-26	9.6e-22	21.02	1813
acacacta	acacacta	2421	1	217.0	39	1.5e-26	9.6e-22	21.02	1814
cgggctac	cgggctac	1186	1	216.9	39	1.5e-26	1e-21	21.00	1815
aaattaaa	aaattaaa	5327	129	216.9	40	3.6e-26	2.4e-21	20.62	1816
ctcctcca	ctcctcca	9748	0	216.9	40	3.7e-26	2.4e-21	20.61	1817
ggaaggga	ggaaggga	11133	634	216.8	40	3.9e-26	2.5e-21	20.60	1818
gatgtgtg	gatgtgtg	3591	0	216.7	40	3.9e-26	2.6e-21	20.59	1819
gtctacag	gtctacag	4126	0	216.7	40	4.1e-26	2.7e-21	20.57	1820
taaagaaa	taaagaaa	5482	0	216.5	40	4.3e-26	2.8e-21	20.55	1821
ggtggtgg	ggtggtgg	10498	4076	216.5	40	4.3e-26	2.8e-21	20.55	1822
gagtgggg	gagtgggg	7587	13	216.4	40	4.5e-26	2.9e-21	20.53	1823
gccgcggg	gccgcggg	5499	16	216.4	39	1.9e-26	1.3e-21	20.90	1824
agatggtc	agatggtc	2251	0	216.3	39	2.0e-26	1.3e-21	20.88	1825
atcgcgcg	atcgcgcg	638	0	216.1	39	2.1e-26	1.4e-21	20.85	1826
actgccat	actgccat	2591	0	216.1	39	2.2e-26	1.4e-21	20.85	1827
gggctggc	gggctggc	7433	0	216.0	40	5.4e-26	3.5e-21	20.45	1828
acctcact	acctcact	3184	0	216.0	39	2.3e-26	1.5e-21	20.83	1829
gtaccccc	gtaccccc	1629	0	215.9	39	2.3e-26	1.5e-21	20.82	1830
tgtttgct	tgtttgct	4990	3	215.9	40	5.6e-26	3.7e-21	20.43	1831
tcctcccc	tcctcccc	12428	0	215.8	40	5.9e-26	3.9e-21	20.41	1832
ctctctcc	ctctctcc	13356	42	215.5	40	6.6e-26	4.3e-21	20.36	1833
atattttt	atattttt	4736	0	215.4	40	6.9e-26	4.5e-21	20.35	1834
gatgccct	gatgccct	3933	0	215.3	40	7.2e-26	4.7e-21	20.33	1835
acctgcct	acctgcct	6504	0	215.1	40	7.8e-26	5.1e-21	20.29	1836
atatctaa	atatctaa	1542	0	214.9	39	3.5e-26	2.3e-21	20.63	1837
tcgagact	tcgagact	870	2	214.9	39	3.6e-26	2.3e-21	20.63	1838
gaatgcca	gaatgcca	2662	0	214.9	39	3.6e-26	2.4e-21	20.63	1839
aatgttgt	aatgttgt	2264	0	214.8	39	3.7e-26	2.4e-21	20.62	1840
tctctcca	tctctcca	8404	0	214.8	40	8.9e-26	5.8e-21	20.24	1841
ggtagcct	ggtagcct	2337	0	214.7	39	3.8e-26	2.5e-21	20.60	1842
aggggcat	aggggcat	2733	0	214.7	39	3.9e-26	2.6e-21	20.59	1843
aagggatc	aagggatc	2215	0	214.6	39	4.1e-26	2.7e-21	20.58	1844
ctcatttt	ctcatttt	5274	0	214.5	40	9.8e-26	6.4e-21	20.19	1845
tctttctt	tctttctt	10946	3158	214.5	40	9.8e-26	6.4e-21	20.19	1846
agctccgg	agctccgg	3669	0	214.5	39	4.2e-26	2.8e-21	20.56	1847
cgcgcggc	cgcgcggc	4666	3	214.4	39	4.3e-26	2.8e-21	20.55	1848
tctgagtt	tctgagtt	7061	1	214.3	40	1.1e-25	7e-21	20.16	1849
gcgcgccg	gcgcgccg	4253	1	214.2	39	4.8e-26	3.1e-21	20.50	1850
tgactcta	tgactcta	2468	0	214.2	39	4.8e-26	3.1e-21	20.50	1851
tctcgagt	tctcgagt	1096	1	214.1	39	4.9e-26	3.2e-21	20.49	1852
taattaat	taattaat	2711	360	214.0	40	1.2e-25	8.1e-21	20.09	1853
gggggcag	gggggcag	8291	35	213.9	40	1.3e-25	8.4e-21	20.08	1854
ggcagggg	ggcagggg	10394	242	213.9	40	1.3e-25	8.4e-21	20.08	1855
cagtctct	cagtctct	6211	0	213.8	40	1.3e-25	8.8e-21	20.06	1856
gtactact	gtactact	760	0	213.7	39	5.8e-26	3.8e-21	20.42	1857
cggcgcgc	cggcgcgc	4492	5	213.7	39	5.8e-26	3.8e-21	20.42	1858
ctctcctc	ctctcctc	11428	1115	213.7	40	1.4e-25	9.1e-21	20.04	1859
tggcattc	tggcattc	2675	0	213.6	39	6.0e-26	3.9e-21	20.41	1860
atgttgtt	atgttgtt	2219	0	213.3	39	6.8e-26	4.4e-21	20.35	1861
cctccagg	cctccagg	8758	0	213.2	40	1.7e-25	1.1e-20	19.96	1862
ggaggggc	ggaggggc	10578	0	213.2	40	1.7e-25	1.1e-20	19.96	1863
gccgcgcg	gccgcgcg	4737	1	213.0	39	7.9e-26	5.2e-21	20.29	1864
ccgggccg	ccgggccg	5176	155	212.9	39	8.1e-26	5.3e-21	20.27	1865
cccccttt	cccccttt	5231	0	212.9	40	1.9e-25	1.3e-20	19.90	1866
gattgggg	gattgggg	2644	0	212.8	39	8.6e-26	5.6e-21	20.25	1867
gcccccgc	gcccccgc	6699	155	212.8	40	2.0e-25	1.3e-20	19.87	1868
tgaaagga	tgaaagga	4120	0	212.6	40	2.2e-25	1.4e-20	19.84	1869
ttgctgaa	ttgctgaa	2903	0	212.2	40	2.5e-25	1.7e-20	19.78	1870
aggggagt	aggggagt	3751	0	212.1	39	1.1e-25	7.5e-21	20.12	1871
tgtgtgct	tgtgtgct	6259	2	212.1	40	2.7e-25	1.8e-20	19.75	1872
gcgggccg	gcgggccg	4272	21	212.0	39	1.2e-25	7.8e-21	20.11	1873
ctgtctcg	ctgtctcg	2562	0	212.0	39	1.2e-25	7.9e-21	20.10	1874
cgactcga	cgactcga	611	1	211.9	39	1.3e-25	8.2e-21	20.09	1875
cccggcgc	cccggcgc	4870	14	211.8	39	1.3e-25	8.3e-21	20.08	1876
cacaccca	cacaccca	6871	60	211.8	40	3.1e-25	2e-20	19.69	1877
tgtgtata	tgtgtata	4130	0	211.5	40	3.5e-25	2.3e-20	19.65	1878
cattggga	cattggga	2112	0	211.4	39	1.5e-25	9.8e-21	20.01	1879
gtagcaga	gtagcaga	2642	0	211.3	39	1.6e-25	1e-20	19.98	1880
taagacct	taagacct	1968	0	211.1	39	1.7e-25	1.1e-20	19.96	1881
cctgggcc	cctgggcc	8479	42	211.1	40	4.1e-25	2.7e-20	19.57	1882
aaaagatg	aaaagatg	4029	0	211.0	40	4.1e-25	2.7e-20	19.57	1883
ttggatgg	ttggatgg	2669	0	211.0	39	1.8e-25	1.2e-20	19.93	1884
atatgtgt	atatgtgt	4410	0	210.9	40	4.5e-25	2.9e-20	19.54	1885
agatggct	agatggct	6924	0	210.9	40	4.5e-25	2.9e-20	19.53	1886
atacccaa	atacccaa	1957	0	210.8	39	2.0e-25	1.3e-20	19.89	1887
gacttgca	gacttgca	1920	0	210.5	39	2.2e-25	1.4e-20	19.84	1888
caggcagg	caggcagg	11194	855	210.5	40	5.2e-25	3.4e-20	19.47	1889
taagtgga	taagtgga	2112	0	210.4	39	2.3e-25	1.5e-20	19.83	1890
ctgatata	ctgatata	1367	0	210.3	39	2.4e-25	1.6e-20	19.81	1891
cccaaaag	cccaaaag	3877	0	210.2	40	5.9e-25	3.9e-20	19.41	1892
gctgagcc	gctgagcc	7044	0	210.1	40	6.0e-25	4e-20	19.40	1893
acagggcc	acagggcc	4519	0	210.1	39	2.6e-25	1.7e-20	19.77	1894
ctgtgttt	ctgtgttt	5777	0	210.1	40	6.1e-25	4e-20	19.40	1895
ccggccgc	ccggccgc	5350	4	210.0	39	2.7e-25	1.8e-20	19.75	1896
gcgcacac	gcgcacac	3356	0	209.9	39	2.8e-25	1.8e-20	19.74	1897
gatcacag	gatcacag	3346	1	209.9	39	2.8e-25	1.9e-20	19.73	1898
aatatcta	aatatcta	1740	2	209.7	39	3.0e-25	2e-20	19.71	1899
gctgaaag	gctgaaag	3598	1	209.7	40	7.2e-25	4.7e-20	19.33	1900
acaacaca	acaacaca	3286	40	209.6	40	7.4e-25	4.8e-20	19.32	1901
gagaaagt	gagaaagt	4254	0	209.6	40	7.4e-25	4.9e-20	19.31	1902
cttccatg	cttccatg	3863	0	209.6	40	7.6e-25	5e-20	19.30	1903
ttctttct	ttctttct	12464	3133	209.5	40	7.6e-25	5e-20	19.30	1904
atcacagg	atcacagg	3199	0	209.5	39	3.3e-25	2.1e-20	19.67	1905
attgggag	attgggag	2268	0	209.5	39	3.3e-25	2.2e-20	19.67	1906
catgaaac	catgaaac	2097	0	209.5	39	3.4e-25	2.2e-20	19.66	1907
cagacaga	cagacaga	8373	1478	209.4	40	8.1e-25	5.3e-20	19.27	1908
gtagtact	gtagtact	924	0	209.4	39	3.5e-25	2.3e-20	19.64	1909
acaacatt	acaacatt	2146	0	209.4	39	3.5e-25	2.3e-20	19.64	1910
tcgagccc	tcgagccc	1602	0	209.4	39	3.5e-25	2.3e-20	19.64	1911
ccgcgccg	ccgcgccg	5419	127	209.3	39	3.6e-25	2.3e-20	19.63	1912
tcacaggg	tcacaggg	4530	0	209.2	40	8.7e-25	5.7e-20	19.24	1913
ctctgtaa	ctctgtaa	3620	0	209.1	40	9.3e-25	6.1e-20	19.21	1914
cggagctc	cggagctc	3121	4	209.0	39	4.1e-25	2.7e-20	19.57	1915
cccaggcc	cccaggcc	10368	55	208.7	40	1.1e-24	7.1e-20	19.15	1916
cccgcgcg	cccgcgcg	4782	0	208.7	39	4.6e-25	3e-20	19.52	1917
ccaggcca	ccaggcca	7617	47	208.6	40	1.1e-24	7.3e-20	19.13	1918
gcgggcgc	gcgggcgc	5657	47	208.5	39	4.9e-25	3.2e-20	19.49	1919
caaaatct	caaaatct	2455	0	208.4	39	5.3e-25	3.5e-20	19.46	1920
gtagcccg	gtagcccg	1292	0	208.4	39	5.3e-25	3.5e-20	19.46	1921
gggaacaa	gggaacaa	3284	0	208.3	39	5.4e-25	3.6e-20	19.45	1922
tttcttta	tttcttta	5542	0	208.3	40	1.3e-24	8.5e-20	19.07	1923
tgatatag	tgatatag	1247	0	208.2	39	5.6e-25	3.6e-20	19.44	1924
ccatcttt	ccatcttt	4929	0	207.8	40	1.5e-24	1e-19	19.00	1925
ggtcccgt	ggtcccgt	1332	0	207.8	39	6.6e-25	4.3e-20	19.37	1926
ccgcctcc	ccgcctcc	8744	121	207.8	40	1.6e-24	1e-19	18.98	1927
ggccgcgc	ggccgcgc	5524	0	207.6	39	7.4e-25	4.9e-20	19.31	1928
tcccaagt	tcccaagt	5658	3	207.5	40	1.7e-24	1.1e-19	18.94	1929
ccccgcgc	ccccgcgc	6621	49	207.4	40	1.8e-24	1.2e-19	18.93	1930
gttgtgag	gttgtgag	4236	0	207.3	40	1.9e-24	1.2e-19	18.91	1931
cctctctc	cctctctc	11989	44	207.2	40	2.0e-24	1.3e-19	18.88	1932
tacaattt	tacaattt	1918	0	207.0	39	9.1e-25	6e-20	19.22	1933
ctctgtag	ctctgtag	6232	0	207.0	40	2.2e-24	1.4e-19	18.85	1934
gattggat	gattggat	1671	2	207.0	39	9.4e-25	6.1e-20	19.21	1935
aacacccg	aacacccg	1296	0	207.0	39	9.4e-25	6.2e-20	19.21	1936
agagaggg	agagaggg	10777	0	206.9	40	2.3e-24	1.5e-19	18.83	1937
cggggccg	cggggccg	5721	54	206.7	39	1.0e-24	6.8e-20	19.17	1938
ctttctct	ctttctct	10951	79	206.7	40	2.5e-24	1.6e-19	18.79	1939
ccgcagtc	ccgcagtc	1958	0	206.6	39	1.1e-24	7.2e-20	19.14	1940
ccgcgggc	ccgcgggc	4820	18	206.5	39	1.1e-24	7.4e-20	19.13	1941
ggggggaa	ggggggaa	4684	0	206.5	40	2.7e-24	1.8e-19	18.76	1942
aagagggc	aagagggc	4827	0	206.2	40	3.0e-24	2e-19	18.71	1943
ctggaggg	ctggaggg	7409	0	206.1	40	3.2e-24	2.1e-19	18.68	1944
gcgcggcg	gcgcggcg	5865	147	206.1	39	1.4e-24	9e-20	19.05	1945
ctctgtct	ctctgtct	9808	481	206.1	40	3.2e-24	2.1e-19	18.68	1946
tggtgagt	tggtgagt	3350	1	205.8	40	3.5e-24	2.3e-19	18.64	1947
aggtctta	aggtctta	2250	0	205.8	39	1.6e-24	1e-19	18.99	1948
tacgtgtg	tacgtgtg	1001	0	205.6	39	1.7e-24	1.1e-19	18.96	1949
tcttgggt	tcttgggt	3442	1	205.5	40	4.0e-24	2.6e-19	18.59	1950
gcctggcc	gcctggcc	8140	84	205.4	40	4.1e-24	2.7e-19	18.57	1951
acttggga	acttggga	5700	0	205.4	40	4.1e-24	2.7e-19	18.57	1952
tctgtgtt	tctgtgtt	5357	2	205.4	40	4.2e-24	2.7e-19	18.57	1953
ccccggag	ccccggag	4471	0	205.3	39	1.9e-24	1.2e-19	18.91	1954
caaaacac	caaaacac	4148	2	205.3	40	4.4e-24	2.9e-19	18.54	1955
accaacca	accaacca	3816	388	205.1	40	4.7e-24	3.1e-19	18.51	1956
aacaccca	aacaccca	3543	2	205.1	39	2.0e-24	1.3e-19	18.88	1957
cgggccgc	cgggccgc	4628	8	205.0	39	2.1e-24	1.4e-19	18.86	1958
atatcagg	atatcagg	1539	0	205.0	39	2.1e-24	1.4e-19	18.85	1959
acgggact	acgggact	1134	0	204.9	39	2.2e-24	1.4e-19	18.85	1960
ggctgccc	ggctgccc	6816	0	204.9	40	5.1e-24	3.3e-19	18.48	1961
cttctgtg	cttctgtg	6157	0	204.9	40	5.1e-24	3.3e-19	18.48	1962
tgcctggc	tgcctggc	7056	0	204.8	40	5.4e-24	3.5e-19	18.45	1963
gggcatca	gggcatca	3460	0	204.6	39	2.5e-24	1.6e-19	18.79	1964
cgcgggcc	cgcgggcc	4201	17	204.5	39	2.5e-24	1.7e-19	18.78	1965
accacatg	accacatg	3930	0	204.5	40	5.9e-24	3.9e-19	18.41	1966
ttaatccc	ttaatccc	5205	0	204.5	40	6.0e-24	3.9e-19	18.41	1967
gtttctct	gtttctct	8358	0	204.5	40	6.1e-24	4e-19	18.40	1968
cagatccc	cagatccc	4339	5	204.3	40	6.4e-24	4.2e-19	18.38	1969
agtgaggt	agtgaggt	3090	0	204.3	39	2.9e-24	1.9e-19	18.73	1970
tcattttt	tcattttt	5847	3	204.3	40	6.6e-24	4.4e-19	18.36	1971
tcactgat	tcactgat	2351	0	204.1	39	3.1e-24	2e-19	18.69	1972
cgcggaac	cgcggaac	969	0	204.0	39	3.2e-24	2.1e-19	18.68	1973
cccccaca	cccccaca	6680	0	203.9	40	7.7e-24	5e-19	18.30	1974
cgggccgg	cgggccgg	4778	157	203.8	39	3.5e-24	2.3e-19	18.64	1975
ctgggccc	ctgggccc	6645	10	203.8	40	8.2e-24	5.4e-19	18.27	1976
aaggatgg	aaggatgg	4580	0	203.6	40	8.6e-24	5.7e-19	18.25	1977
cggcgccg	cggcgccg	4388	23	203.2	39	4.5e-24	2.9e-19	18.53	1978
atccatta	atccatta	1299	0	203.2	39	4.5e-24	2.9e-19	18.53	1979
accaaaag	accaaaag	2932	0	202.9	39	5.1e-24	3.3e-19	18.48	1980
gcggccgg	gcggccgg	5433	10	202.8	39	5.2e-24	3.4e-19	18.46	1981
agccacca	agccacca	7139	6	202.8	40	1.2e-23	8e-19	18.10	1982
gggatctg	gggatctg	4452	0	202.8	40	1.2e-23	8e-19	18.10	1983
acaaaaaa	acaaaaaa	7400	255	202.7	40	1.3e-23	8.2e-19	18.08	1984
ctgggcta	ctgggcta	4888	0	202.6	40	1.3e-23	8.5e-19	18.07	1985
tgtgcgcg	tgtgcgcg	2437	0	202.3	39	6.3e-24	4.1e-19	18.38	1986
ggaagagc	ggaagagc	6605	0	202.3	40	1.5e-23	9.6e-19	18.02	1987
ggaggcgg	ggaggcgg	8684	113	202.1	40	1.6e-23	1.1e-18	17.98	1988
[truncated: 63,556 more rows]

## Sheet: significant 8nt
seq	cluster	chi2	df	chi2 rank	occ	over
GGGGGGGG	1	2869.6	40	11	13187	35305
AAATGTAA	1	1603.8	40	53	5352	6
AATGTAAA	1	1451.3	40	73	4853	6
GAAATGTA	1	1441.7	40	74	3975	0
TACCTAAT	1	1414.3	39	78	1831	0
TGGGGGGG	1	1413.1	40	79	11361	0
ATGTAAAT	1	1509	40	69	4416	5
AATACCTA	1	1291	39	98	2059	0
GGGAGGGA	2	2825.2	40	12	22079	6821
AGGGAGGG	2	2709.1	40	13	22024	6793
GAGGGAGG	2	2601.9	40	17	22778	7005
GGAGGGAG	2	2452.8	40	18	23158	7052
GGGGTGGG	2	1887.9	40	38	28257	4894
GGGTGGGG	2	1835.5	40	40	29196	4831
GGGGGTGG	2	1748.3	40	45	21298	2321
GGTGGGGG	2	1540.4	40	62	21953	2316
GGGGAGGG	2	1526.9	40	64	27814	2921
GGGTGGGT	2	1515.2	40	67	10242	1580
GGGAGGGG	2	1436.4	40	75	28213	2847
TGGGTGGG	2	1333.5	40	91	13382	1592
GGGGGAGG	2	1298.3	40	97	21128	982
GTGGGTGG	2	1283	40	100	12258	1620
GTGTGTGT	3	67958.6	40	2	57925	119220
TGTGTGTG	3	64651.2	40	4	60588	119391
TGTGTGTA	3	5187.1	40	5	12099	0
ATGTGTGT	3	3312.9	40	7	13002	0
GTGTGTAT	3	3002.7	40	10	9049	0
CGTGTGTG	3	2699.6	40	14	5734	0
TGTGTATG	3	2433.7	40	19	8692	182
TGTGTGTT	3	2310.1	40	22	9110	16
GTGTATGT	3	2310.1	40	23	7049	161
GTATGTGT	3	2171.6	40	27	7179	142
TATGTGTG	3	2025.8	40	32	9282	0
TGTATGTG	3	1923.4	40	35	8536	142
CTGTGTGT	3	1823.4	40	41	11247	0
GTGTGTGC	3	1639.6	40	48	11934	0
AGTGTGTG	3	1607.7	40	52	8880	0
GCGTGTGT	3	1581.8	40	57	3760	0
GGTGTGTG	3	1460.4	40	72	9874	27
GTGCGTGT	3	1407.3	39	81	3344	229
TGCGTGTG	3	1405.6	40	82	3951	236
TGTGCGTG	3	1369.2	40	86	4000	229
TGTGTGTC	3	1359.9	40	87	8098	0
GTGTGTGA	3	1352.5	40	88	7090	0
TTGTGTGT	3	1331.5	40	92	7918	4
GTGTGCGT	3	1302.2	39	95	3260	213
ACACACAC	4	70917.1	40	1	58130	119763
CACACACA	4	67142.9	40	3	61040	120155
TACACACA	4	4862.2	40	6	12279	0
ACACACAT	4	3149.6	40	8	13012	0
ATACACAC	4	3021.5	40	9	8567	0
CACACACG	4	2687.3	40	16	5552	0
ACATACAC	4	2397.9	40	20	7006	133
CATACACA	4	2372.3	40	21	8720	141
ACACATAC	4	2225.6	40	25	7335	146
AACACACA	4	2198.9	40	26	8825	10
CACACATA	4	2159.7	40	28	9114	0
GCACACAC	4	1953.2	40	34	12086	0
ACACACAG	4	1758.6	40	44	11441	0
CACGCACA	4	1614.4	40	50	4143	282
CACACGCA	4	1613.5	39	51	3984	278
ACACACGC	4	1571.7	39	58	3744	0
ACACACAA	4	1531.9	40	63	8071	6
ACGCACAC	4	1526.8	39	65	3343	258
ACACGCAC	4	1493.9	39	70	3292	284
TCACACAC	4	1425.1	40	77	7108	0
CACACACC	4	1393.9	40	83	9979	22
CGCACACA	4	1333.6	40	90	4575	0
CACATACA	4	1987	40	33	8662	154
CACACACT	4	1902	40	37	8669	0
GACACACA	4	1519	40	66	8126	0
TCCCTCCC	5	2269.8	40	24	21581	6396
CCCTCCCT	5	2145.9	40	29	21556	6296
CCTCCCTC	5	2077.1	40	30	22432	6535
CTCCCTCC	5	2058.3	40	31	23091	6669
CCCACCCC	5	1911.5	40	36	28706	4804
CCCTCCCC	5	1759.3	40	43	27944	3220
CCACCCCC	5	1586.8	40	56	21691	2341
CCCCACCC	5	1569.3	40	60	29352	4752
CCCCCACC	5	1432.1	40	76	21813	2241
CCTCCCCC	5	1284.1	40	99	21023	999
ACCCACCC	5	1632	40	49	9953	1641
CCCCTCCC	5	1591	40	54	28543	3059
CCCCCCCC	6	2696.2	40	15	13279	35032
TTTACATT	6	1851.1	40	39	5034	5
TTACATTT	6	1771.1	40	42	5380	9
ATTTACAT	6	1747.3	40	46	4390	4
ATTAGGTA	6	1650.9	39	47	1923	0
AATGCTAT	6	1589.5	40	55	2779	0
TTAGGTAT	6	1491.8	39	71	2137	0
TACATTTC	6	1410.3	40	80	4332	0
GGCTGGCC	6	1384.2	40	85	11294	0
GCATATAA	6	1340.6	39	89	2141	0
TAGCTCCT	6	1314.4	40	93	4535	3
CGACTAGG	6	1307.4	39	94	1256	0
CCCCCCCA	6	1299.9	40	96	11260	0
TAGGTATT	6	1546	39	61	2103	0
GGCCAGCC	6	1387	40	84	11332	0
TTTTTTTT	7	1571.4	40	59	25272	72112
AAAAAAAA	8	1510.9	40	68	25075	72522
